1 **A marmoset brain cell census reveals influence of developmental origin and functional class on**  
2 **neuronal identity**

3 Fenna M. Krienen<sup>1,2\*</sup>✉, Kirsten M. Levandowski<sup>2,3,4</sup>, Heather Zaniewski<sup>2,3,4</sup>, Ricardo C.H. del Rosario<sup>2</sup>,  
4 Margaret E. Schroeder<sup>2,3,4</sup>, Melissa Goldman<sup>2</sup>, Martin Wienisch<sup>2,3,4</sup>, Alyssa Lutservitz<sup>1</sup>, Victoria F. Beja-  
5 Glasser<sup>2,3,4</sup>, Cindy Chen<sup>2,3,4</sup>, Qiangge Zhang<sup>2,3,4</sup>, Ken Y. Chan<sup>2</sup>, Katelyn X. Li<sup>3,4</sup>, Jitendra Sharma<sup>3,4</sup>, Dana  
6 McCormack<sup>2,3,4</sup>, Tay Won Shin<sup>3,4,5</sup>, Andrew Harrahill<sup>3,4</sup>, Eric Nyase<sup>3,4</sup>, Gagandeep Mudhar<sup>6</sup>, Abigail  
7 Mauermann<sup>3,4,5</sup>, Alec Wysoker<sup>2</sup>, James Nemes<sup>2</sup>, Seva Kashin<sup>2</sup>, Josselyn Vergara<sup>2</sup>, Gabriele Chelini<sup>7</sup>,  
8 Jordane Dimidschstein<sup>2</sup>, Sabina Berretta<sup>8,9</sup>, Benjamin E. Deverman<sup>2</sup>, Ed Boyden<sup>3,4,5</sup>, Steven A.  
9 McCarroll<sup>1,2#\*</sup>, Guoping Feng<sup>2,3#\*</sup>

10

11

12 <sup>1</sup> Department of Genetics, Harvard Medical School; Boston, Massachusetts 02115, USA.

13 <sup>2</sup> Stanley Center for Psychiatric Research, Broad Institute of MIT and Harvard; Cambridge, Massachusetts  
14 02142, USA.

15 <sup>3</sup> McGovern Institute for Brain Research, Department of Brain and Cognitive Sciences, Massachusetts  
16 Institute of Technology; Cambridge, Massachusetts 02142, USA.

17 <sup>4</sup> Department of Brain and Cognitive Sciences, Massachusetts Institute of Technology; Cambridge,  
18 Massachusetts 02139, USA.

19 <sup>5</sup> HHMI, Cambridge, MA, USA.

20 <sup>6</sup> Princeton Neuroscience Institute, Princeton University. Princeton, NJ 08544, USA.

21 <sup>7</sup> Center for Mind/Brain Sciences, University of Trento. Piazza della Manifattura n.1, Rovereto (TN).  
22 38068, IT.

23 <sup>8</sup> Basic Neuroscience Division, McLean Hospital, Belmont MA USA.

24 <sup>9</sup> Dept. of Psychiatry, Harvard Medical School, Boston, MA USA.

25

26 #These authors contributed equally to this work

27 \*Corresponding authors. Email: [fkrienen@princeton.edu](mailto:fkrienen@princeton.edu), [mccarroll@genetics.med.harvard.edu](mailto:mccarroll@genetics.med.harvard.edu),  
28 [fengg@mit.edu](mailto:fengg@mit.edu)

29 ✉Present affiliation: Princeton Neuroscience Institute. Princeton NJ USA

30 **Abstract:**

31 The mammalian brain is composed of many brain structures, each with its own ontogenetic and  
32 developmental history. Transcriptionally-based cell type taxonomies reveal cell type composition and  
33 similarity relationships within and across brain structures. We sampled over 2.4 million brain cells across  
34 18 locations in the common marmoset, a New World monkey primed for genetic engineering, and used  
35 single-nucleus RNA sequencing to examine global gene expression patterns of cell types within and  
36 across brain structures. Our results indicate that there is generally a high degree of transcriptional  
37 similarity between GABAergic and glutamatergic neurons found in the same brain structure, and there are  
38 generally few shared molecular features between neurons that utilize the same neurotransmitter but reside  
39 in different brain structures. We also show that in many cases the transcriptional identities of cells are  
40 intrinsically retained from their birthplaces, even when they migrate beyond their cephalic compartments.  
41 Thus, the adult transcriptomic identity of most neuronal types appears to be shaped much more by their  
42 developmental identity than by their primary neurotransmitter signaling repertoire. Using quantitative

43 mapping of single molecule FISH (smFISH) for markers for GABAergic interneurons, we found that the  
44 similar types (e.g. *PVALB*+ interneurons) have distinct biodistributions in the striatum and neocortex.  
45 Interneuron types follow medio-lateral gradients in striatum but form complex distributions across the  
46 neocortex that are not described by simple gradients. Lateral prefrontal areas in marmoset are  
47 distinguished by high relative proportions of *VIP*+ neurons. We further used cell-type-specific enhancer  
48 driven AAV-GFP to visualize the morphology of molecularly-resolved interneuron classes in neocortex  
49 and striatum, including the previously discovered novel primate-specific *TAC3*+ striatal interneurons. Our  
50 comprehensive analyses highlight how lineage and functional class contribute to the transcriptional  
51 identity and biodistribution of primate brain cell types.

52

53 **One-Sentence Summary:** Adult primate neurons are imprinted by their region of origin, more so than by  
54 their functional identity.

55

### 56 **Main Text:**

57 The mammalian brain's complex functional diversity stems from its vast cellular and molecular  
58 repertoire. To provide a more complete understanding of the cell types across major cortical and  
59 subcortical structures in a non-human primate brain, we conducted a census of cell types of the adult  
60 marmoset brain based on their transcriptional profiles. Previous single cell sequencing studies of the  
61 marmoset brain focused on single brain regions (1, 2), or on specific cell classes across regions (3, 4).  
62 However, inclusion of both closely and distantly related brain structures and cell types can yield insights  
63 into the developmental and ontological relationships between them (5). Comprehensive transcriptomic  
64 cell type atlases have been produced for the mouse (6–9). Complementing these, recent transcriptomic  
65 datasets that sample many regions across humans and nonhuman primates brains (10–12) offer powerful  
66 resources for comparative analysis of brain cell type features. We generated single-nucleus RNA  
67 sequencing (snRNA-seq; 10x Genomics 3' v3.1) data from 2.4 million unsorted brain cell nuclei across 8  
68 neocortical and 10 subcortical locations from 10 young adult marmosets (4 M, 6 F), and resolved clusters  
69 from all major neuronal and non-neuronal cell classes. snRNA-seq data were generated as part of the  
70 Brain Initiative Cell Census Network (BICCN, RRID:SCR\_015820) and are available on the BICCN  
71 Data Center (RRID:SCR\_022815; <https://biccn.org/data>) as well as the NeMO archive  
72 ([RRID:SCR\\_016152; https://doi.org/10.1101/2022.10.18.512442](https://doi.org/10.1101/2022.10.18.512442)).

73 All neuron-containing brain structures in the central nervous system possess both excitatory and  
74 inhibitory neuronal populations, though the proportions and degree of developmental relatedness between  
75 these two populations varies by structure. In the neocortex and other telencephalic structures of  
76 vertebrates, distinct populations of neurons are typically categorized based on their neurotransmitter  
77 status as either inhibitory (GABAergic) or excitatory (glutamatergic). In other brain structures, primary  
78 neurotransmission appears less essential to a cell type's identity. We found that the transcriptional  
79 identities of excitatory and inhibitory neurons within telencephalic brain structures segregate strongly,  
80 consistent with previous studies in other mammalian species (2, 6, 7, 13). In contrast, there is much  
81 greater transcriptional similarity between GABAergic and glutamatergic neuronal types in non-  
82 telencephalic compartments. Moreover, few gene expression distinctions present in telencephalic  
83 glutamatergic neurons are shared with glutamatergic neurons in non-telencephalic brain regions. While  
84 primary neurotransmission did not drive transcriptional similarity between neurons, their brain structure

85 of origin did; the adult transcriptomic identity of most neuronal types appear to be shaped much more by  
86 their developmental identity than by their neurotransmitter signaling repertoire.

87 In the mouse, overall interneuron/excitatory neuron ratios are thought to be largely invariant across the  
88 neocortex (14). Even so, relative proportions of interneuron subtypes do vary and underlie principles of  
89 functional organization in the mouse neocortex (15). The small size of the marmoset brain and its near-  
90 lissencephalic neocortex enables quantitative, cell-type-resolved mapping in a primate. We used smFISH  
91 to spatially profile major interneuron types across marmoset striatum and neocortex. In the striatum,  
92 major interneuron types are distributed as medial-lateral gradients. In contrast, the marmoset neocortex  
93 has a much more complex topography of interneuron concentrations that is not explained by a single  
94 spatial axis. Lateral prefrontal areas in particular, which have undergone expansion in primate evolution  
95 (16) are typified by higher proportions of *VIP+* and *LAMP5/ID2+* interneurons and lower proportions of  
96 *SST+* interneurons relative to all other neocortical areas.

97 The development of viral tools to effectively deliver transgenes to specific primate brain cell types has  
98 many powerful applications (17–20). We used this approach to sparsely label and reconstruct the  
99 morphologies of selected types. We reconstructed a set of molecularly-characterized neurons that had  
100 received systemic delivery of an AAV carrying a reporter (AAV9-hDlx5/6-GFP-fGFP) under an  
101 interneuron-selective regulatory element(19). Reconstructions are available for download from the Brain  
102 Image Library (BIL; <https://doi.org/10.35077/g.609>). As AAV9-hDlx5/6-GFP-fGFP did not label a  
103 recently discovered, primate-specific striatal interneuron type (3) w(3)This enabled visualization(3).  
104 Together, our census of major transcriptomically-defined brain cell types and quantitative mapping of  
105 interneuron biodistributions provides a key resource for the primate neuroscience community and for  
106 comparative studies of cell type evolution.

### 107 *A transcriptomic census of marmoset brain cell types*

108 We acquired snRNA-seq data from 18 brain regions collected using 10x Genomics 3' 3.1 chemistry  
109 across 10 young adult marmosets (ages 1.5-4; 6 F) as well as a small dataset from PFC of two aged  
110 animals (**Fig. 1, Fig. S1, Table S1**). The number of donors per brain structure varied (min = 2, max = 10;  
111 **Fig. S1**), as did the cell sampling rate per brain structure (**Fig. 1A; Fig. S1A, Table S2**). Neocortex was  
112 the most comprehensively sampled in terms of total numbers, donors, and regional dissections. We  
113 acquired data from: cerebellum, brainstem, hypothalamus, thalamus, amygdala, striatum (separate  
114 dissections for caudate, putamen and nucleus accumbens), hippocampus, basal forebrain and neocortex.  
115 Within the neocortex, we separately sampled 8 neocortical locations (prefrontal, temporal pole, S1, M1,  
116 A1, V2, V1, lateral parietal association), and within PFC, from four prefrontal subdivisions (**Fig. S1B-C**).

117 Nuclei from each brain structure were pooled across donors and analyzed to identify major cell types and  
118 their proportions by brain structure (**Fig. 1B-D**). Using linear discriminant analysis (scPred;(21)) trained  
119 on a supervised set of cell class labels, we identified and discarded low quality cells and doublets, and  
120 assigned each nucleus to its probable major type – astrocyte, endothelia, ependyma,  
121 microglia/macrophage, neuron, oligodendrocyte, or oligodendrocyte precursor cell (OPC).

122 After major cell type assignment, nuclei were clustered by brain structure to reveal subtype diversity  
123 within each major class. We used a previously described clustering pipeline (6) based on independent  
124 components analysis (fastICA). Each clustering analysis involved additional curation of doublets and  
125 outlier cells, followed by a second round of sub-clustering of major clusters. At each of these curation

126 stages, independent components that loaded on individual donors or batches were excluded and  
127 reclustering was performed to attenuate donor and batch effects on clustering results. For each cluster, a  
128 “metacell” was generated by summing transcript counts of individual cells of each type together, followed  
129 by scaling and normalizing to 100,000 transcripts/nucleus. These regional and cell-type resolved  
130 metacells were the starting point for most cross-region analyses. The final snRNA-seq dataset size after  
131 curation contained 2.01 million cells (**Table S2**).

### 132 *Hierarchical clustering of neurons*

133 Cell types are identified based on factors including their function, developmental origin, lineage, and  
134 regional context (22–24). We studied how transcriptional profiles related to each other across 288  
135 neuronal cell types (metacells) sampled across all 18 marmoset brain structures. Individual replicates and  
136 other variables (age, sex) were generally proportionately represented across resolved cell types with  
137 several exceptions that were likely mainly to differences in dissection across donors (**Fig. S1B-E, Fig S2**).  
138 We used hierarchical clustering to situate the neuronal types on a dendrogram computed using distances  
139 calculated from the top 100 PC scores across neuron types (**Fig. 1C**). Most telencephalic types  
140 (neocortex, amygdala, hippocampus, striatum) clustered distinctly from diencephalic and hindbrain types,  
141 indicating that developmental lineage continues to shape the transcriptional identity of adult primate brain  
142 cell types. However, of the 7 major clades, 4 contained mixtures of cell types at the terminal (leaf level)  
143 originating from distinct cephalic compartments. For example, basal forebrain neuron types intermingled  
144 with hypothalamic types, suggesting closer transcriptional similarity of two structures that occupy distinct  
145 cephalic compartments. The overall dendrogram configuration was broadly conserved when recomputed  
146 using other distance functions (**Fig. S2A**).

147  
148 Transcription factors are master regulators that determine cell type identity in development through  
149 temporal patterning, suggesting that they may be a key class of genes that determine transcriptional  
150 identity in adults (8). Supporting this view, some transcription factors are associated with specific brain  
151 structures or cephalic compartments, such as *FOXG1* in the telencephalon (**Fig. 1D**) and *OTX2* in non-  
152 telencephalic structures (**Fig. 1D**), show expression restricted to specific clades in the dendrogram.  
153 Hierarchical clustering based only on transcription factor genes was highly similar to the original tree  
154 computed over all expressed genes. However, the tree ordering generated by transcription factors alone  
155 did not produce lower tree distances to the original tree than similarly sized sets of randomly selected  
156 expressed genes (**Fig. S2D**). This suggests that though transcription factors undoubtedly play central roles  
157 in determining cell identity in development, they do not determine global transcriptomic similarities  
158 across neuron types in adulthood.

159  
160 To determine whether a broadly similar transcriptomically-defined dendrogram is conserved across  
161 species, we repeated the analysis using a prior single cell RNA sequencing dataset of regions sampled  
162 across the mouse brain (6) (**Fig. S2C,D**). We found a conserved tree structure in the mouse data,  
163 suggesting broad conservation of the features that drive transcriptomic similarities in neurons across adult  
164 primates and rodents. The relative ordering of the major clades was strikingly similar across species: for  
165 example, in both species, telencephalic glutamatergic neurons are most similar to a clade of GABAergic  
166 neurons that includes striatal spiny projection neurons (SPNs) as well as transcriptionally similar types in  
167 amygdala and hypothalamus (**Fig. S2C**). In both species, all telencephalic GABAergic interneurons

168 formed a large single clade, and cerebellar types were most similar to a mixed clade containing thalamic  
169 and brainstem types.

170  
171 Borrowing from ancestral state reconstruction methods typically used to estimate evolutionary  
172 divergences between genetic sequences or species (25), we applied a maximum likelihood-based  
173 approach (fastAnc) to the expression of all genes at each leaf (observed cell type), along with the branch  
174 lengths between adjacent leaves, in order to reconstruct the transcriptomic state (inferred expression  
175 values of genes) at internal nodes of the marmoset dendrogram. We then compared pairwise “ancestral”  
176 expression values of all genes in the parent nodes for each of the 7 major clades depicted in **Fig. 1C**, **Fig.**  
177 **S2E-F**). Transcription factors (TFs) were overrepresented in comparisons of internal nodes that contained  
178 cell types stemming from developmentally related brain regions, but were not overrepresented when the  
179 leaf cell types stemmed from multiple regions (**Fig. S2E-F**). While transcription factor expression reflects  
180 the developmental origins of cell types, and while their expression alone recapitulates the tree structure  
181 seen by including all genes (**Fig. S2D** and (8)), some cell types are transcriptionally similar despite having  
182 distinct developmental origins. This may reflect convergence in adult transcriptional profiles (5, 26).

### 183 *Many adult neuronal types are imprinted by their developmental origin*

184 We next inspected RNA expression patterns along with details about each cell type’s dissection region-of-  
185 origin to assess which brain structures tended to contain highly similar cell types and which had more  
186 dispersed transcriptional profiles. Some tissues, such as the neocortex, gave rise to cell types that  
187 exclusively clustered within their cephalic domain (**Fig. 1C**), a result unlikely to be driven by ambient  
188 RNA contamination since regionally variable genes were not over-enriched in ambient RNA estimates  
189 (**Fig. S5A**). However, within a given cephalic domain, cell types from distinct brain structures were often  
190 more similar to types sampled from other brain structures. For example, while hippocampal cell types  
191 were all found in telencephalic clades in the dendrogram, many individual hippocampal types were more  
192 similar to types in the amygdala or neocortex than they were to other hippocampal types (**Fig. 1C**).

193  
194 Out of 62 neocortical neuron types, only two types joined clades outside of the major GABAergic and  
195 glutamatergic telencephalic branches: (1) the *MEIS2*+ prefrontal GABAergic types (**Fig. S1C**; **Fig. 1D**;  
196 **Fig. S3**), which formed a clade most similar to diencephalic and midbrain *OTX2*+ types, and (2)  
197 Neocortical Cajal-Retzius (C-R) neurons, which were more similar to a clade of *LHX9*+ thalamic neurons  
198 despite indications that they predominantly originate from the cortical hem in primates (27) (**Fig. 1D**). As  
199 with hippocampal neurons, neocortical GABAergic neurons neighbored other GABAergic neurons from  
200 the striatum, amygdala and hippocampus that tended to express the same marker. For example, all  
201 *PVALB*+ types sampled across these telencephalic structures grouped together (**Fig. S3**). Unlike  
202 neocortical GABAergic interneurons, glutamatergic neocortical neurons were broadly most similar to  
203 other telencephalic glutamatergic types, but showed almost no mixing at the terminal leaf level (**Fig. 1C**).  
204 Cerebellar neuron types were entirely restricted to a single, unmixed clade in both mouse and marmoset  
205 (**Fig. S2C**), though this relative isolation could be due to the lack of other hindbrain structures in our  
206 datasets (**Fig. 1C**).

207  
208 Consistent with previous work suggesting that mammalian thalamus contains both midbrain-derived and  
209 forebrain-derived GABAergic interneurons (28), we observed distinct clades of thalamic neurons that  
210 were most similar to diencephalic or midbrain populations. Interestingly, thalamic GABAergic neurons



211 that were *OTX2*<sup>+</sup> were distinct from other thalamic populations (**Fig. 1D**, **Fig. S3**), and formed a clade  
212 with other *OTX2*<sup>+</sup> neurons sampled from brainstem, hypothalamus, and basal forebrain. These  
213 populations were *SOX14*<sup>+</sup>, while thalamic *SOX14*<sup>-</sup> populations joined mixed diencephalic-telencephalic  
214 clades (**Fig. 1D**; **Fig. S3**). The dispersion of thalamic neurons to distinct diencephalic and midbrain-  
215 dominated clades supports recent work suggesting multiple developmental origins for primate thalamic  
216 GABAergic neurons (28). We did not find thalamic GABAergic populations that were transcriptionally  
217 similar to telencephalic types (29), though we note that the next most proximal clade to the thalamic  
218 *OTX2*<sup>+</sup> types were *MEIS2*<sup>+</sup> GABAergic neocortical neurons (**Fig. 1D**).

219  
220 Amygdala neuron types were distributed to 5 of the 7 major clades (**Fig. 1C**). Consistent with this widely  
221 dispersed cellular profile, the amygdala is composed of loosely associated nuclei with diverse  
222 phylogenetic and developmental origins, as documented by previous studies (30, 31). Specifically, the  
223 basolateral amygdala, which has a high proportion of excitatory neurons, shares properties with cortical  
224 and claustrum neurons, whereas the intercalated nuclei of the amygdala contain inhibitory *FOXP2*<sup>+</sup>  
225 projection neurons that share developmental origins with some striatal GABAergic populations such as  
226 striatal spiny projection neurons, SPNs (5, 32, 33). In our dataset, glutamatergic amygdalar neurons were  
227 most similar to neocortical and hippocampal glutamatergic neurons, while *FOXP2*<sup>+</sup> GABAergic  
228 amygdalar neurons clustered with SPN types (**Fig. S3**), in line with recent lineage tracing studies in mice  
229 (5) and with analysis of fetal macaque types (33). Amygdala GABAergic interneuron types had highly  
230 divergent transcriptomic profiles; while some were most similar to telencephalic GABAergic neurons,  
231 others clustered with hypothalamic GABAergic neurons. These results underscore the diversity and  
232 developmental complexity of cell types comprising the amygdala nuclei.

### 233 *Neurotransmitter usage is not strongly associated with transcriptomic identity*

234 The neurotransmitters used by neurons are central to their function, and neurons are often classified by  
235 their primary neurotransmitter. However, synthesis of the major neurotransmitters – glutamate (in  
236 mammals, excitatory) and GABA or glycine (inhibitory) – requires only a modest number of genes, and  
237 GABA itself is synthesized from glutamate (34). It is unclear whether many or few other genes are  
238 correlated with GABAergic (or glutamatergic) identity. For instance, whether neurotransmitter utilization  
239 is strongly associated to the identity of neuron types may differ by brain structure: transcriptomically-  
240 defined neuron types in the neocortex and other telencephalic structures are hierarchically grouped into  
241 GABAergic and glutamatergic types (2, 7, 26), which reflects both their distinct developmental origins  
242 and their distinct neurotransmitter repertoire. In other brain structures such as the hypothalamus, the  
243 distinction between neurons utilizing GABA or glutamate is much less clear at the transcriptional level (8,  
244 35) (**Fig. 1C,E,F**, **Fig. S3**).

245  
246 To determine whether neurotransmitter identity was associated with a general transcriptional identity  
247 across all neurons expressing the same neurotransmitter, we examined expression of genes encoding the  
248 most prevalent vesicular glutamate transporters (*SLC17A6*, *SLC17A7*) and GABA synthesis enzymes  
249 (*GAD1*, *GAD2*) (**Fig. 1C-F**; **Fig. S3**). If primary neurotransmitter usage was strongly associated with the  
250 expression of many other genes, we would expect that neurons belonging to the same neurotransmitter set  
251 (GABAergic or glutamatergic) would preferentially group together regardless of other factors (such as  
252 developmental origin). However, we did not find evidence for strong global transcriptomic identities of  
253 GABAergic and glutamatergic neurons. Neuronal types from each set were distributed across the tree,

254 suggesting divergent transcriptomic identities of cell types that share a common neurotransmitter (**Fig.**  
255 **1C**).

256  
257 In telencephalic structures such as neocortex, hippocampus, and amygdala, glutamatergic neurons all  
258 express *SLC17A7* and segregate from GABAergic telencephalic neurons (**Fig 1C,D**). Telencephalic  
259 GABAergic neurons separated into distinct clades: one for GABAergic interneurons, and another for  
260 GABAergic projection neurons such as SPNs of the striatum (**Fig 1C, Fig S2**). In non-telencephalic  
261 structures such as the hypothalamus, basal forebrain, thalamus, brainstem, and cerebellum, GABAergic  
262 and glutamatergic types were highly intermixed. This pattern held in a mouse scRNA-seq dataset, and  
263 when using different approaches for hierarchical clustering (**Fig. S2**). Even within the telencephalon,  
264 neurotransmitter identity did not drive global transcriptional similarity between major clades. For  
265 instance, GABAergic projection neurons, such as SPNs of the striatum, were transcriptionally closer to  
266 glutamatergic neurons in the neocortex, amygdala, and hippocampus than they were to telencephalic  
267 GABAergic interneurons (**Fig. 1C; Fig. S3**).

268  
269 Although glutamatergic neurons from distinct cephalic origins do not cluster together, maintaining  
270 glutamatergic neurotransmission or associated function could require a common, core set of genes. To  
271 assess how neurotransmitter utilization relates to genome-wide RNA expression patterns, we examined  
272 distributions of gene-gene correlations across cell types (**Fig. 1E**). Surprisingly few genes are strongly  
273 positively correlated with both *SLC17A6* (VGLUT2) and *SLC17A7* (VGLUT1) expression, even those  
274 associated with glutamate synthesis and packaging (**Fig. S3**). 116 genes had correlated expression to  
275 *SLC17A7* (Spearman's tau > 0.5). The median correlation of *SLC17A6* to those 116 genes was centered at  
276 tau = 0.05 (**Fig. 1F**). Only a few genes correlated above 0.5 to both *SLC17A6* and *SLC17A7*, including  
277 *BDNF*, *NRN1*, and *TAFAI*. Moreover, only 10 genes (*ARPP21*, *BDNF*, *CACNA2D1*, *CHN1*, *CHST8*,  
278 *CPNE4*, *LDB2*, *NRN1*, *PTPRK*, *TAFAI*) are differentially expressed (> 2.5 fold change) in both  
279 *SLC17A6*+ glutamatergic neurons and *SLC17A7*+ glutamatergic neurons relative to *GAD1*+ neurons. We  
280 examined the principal component loadings to see if any were associated with primary neurotransmission.  
281 While individual PCs loaded strongly on specific parts of the tree (**Fig. S2B**), none of the top 20 PCs  
282 (accounting for 92% variance) distinguished cell types by their neurotransmission. The bulk of gene  
283 expression that distinguishes neuronal types from each other appears incidental to neurotransmission.  
284

### 285 *Neocortical expression fingerprints differ between neurons and glia*

286 The mammalian neocortex is partitioned into functionally, connectionally, and cytoarchitectonically  
287 distinct regions, called areas. We examined regional distinctions in proportions and gene expression of  
288 cell types from 8 cortical locations (**Fig. 2A**). Consistent with prior reports (3, 6, 13, 36), cell subtypes  
289 identified in one cortical region were generally present in all other cortical regions, though in different  
290 proportions (**Fig. 2B**). There were two main exceptions in neurons. GABAergic *MEIS2*+ cells  
291 (GABAergic cluster 6, **Fig. 2B**) were far overrepresented in PFC samples (specifically in dissections of  
292 medial and medio-orbital PFC, **Fig. S1C**), a compositional distinction not observed in mouse (6, 36). The  
293 second exception was a cluster of *RORB*+, *KCNH8*+ glutamatergic neurons in V1 (and to a lesser extent  
294 V2) that diverged from *RORB*+ populations found in the other cortical regions (Glutamatergic cluster 2,  
295 **Fig. 2B-D**). The expansion and divergence of *RORB*+ populations in visual cortex is consistent with the  
296 elaboration and sub-specialization of primary V1 layer IV in primates (37). One astrocyte type, marked

297 by high expression of *VCAN*, was highly enriched in V1 and V2 (Astrocyte cluster 3, **Fig. 2D**). Using  
298 smFISH, we validated higher co-localization of *VCAN* and *GFAP* in V1-adjacent white matter compared  
299 with PFC and V1 gray matter (**Fig. S4I**). *VCAN* is also expressed in OPCs. We did not observe higher  
300 *VCAN* expression in V1 OPCs, suggesting that the regional variation in *VCAN* expression is specific to  
301 astrocytes (**Fig. 2E**).

302

303 Glutamatergic neurons sampled from different neocortical locations show regionally distinct gene  
304 expression (36). In primates, this is also true of neocortical GABAergic neurons (3). Astrocytes in mouse  
305 and primate brains are heterogeneous across major subdivisions (**Fig. S4D-H**), but the extent to which  
306 they are locally customized in distinct regions of neocortex is less well understood (2, 7, 26, 38)(4).  
307 Studies in mice have revealed layer-specific astrocyte subpopulations in the cortex (39) and variation  
308 between neocortical and hippocampal astrocytes (40).

309

310 To address whether cortical regional variation in gene expression is shared across cell types, we  
311 performed pairwise comparisons between major clusters of cortical excitatory neurons, inhibitory  
312 neurons, astrocytes and oligodendrocyte lineage types across all eight neocortical locations (**Fig. 2F**,  
313 **Table S3**). Each of these cell classes displayed regionally differentially expressed genes (rDEGs) across  
314 neocortical regions (**Fig. 2F**), an effect that could not be attributed to ambient RNA contamination (**Fig.**  
315 **S5A**). Similar to what has been described in the mouse cortex (39, 40), astrocytes within the marmoset  
316 cortex exhibited regional transcriptional variation, but overall neurons had more rDEGs than macroglia  
317 (**Fig. 2F**; **Fig. S5B**). 62% of rDEGs in interneurons were also rDEGs in excitatory neurons. Interestingly,  
318 though cortical astrocytes and oligodendrocytes arise from a common lineage with cortical excitatory  
319 neurons (41), they shared a lower percentage of rDEGs in common with excitatory neurons as compared  
320 with interneurons (25% astrocytes, 25% oligodendrocyte lineage). Regionally differentially expressed  
321 genes within a cell class (glutamatergic, GABAergic, astrocyte, oligodendrocyte lineage) tend to be  
322 biased in the same regions across subtypes within that class. However, certain subtypes and regions  
323 accumulated more rDEGs than others. For example, across all cell types and particularly within neurons,  
324 higher-order temporal association cortex and prefrontal cortex tended to be most distinct from V1 and V2  
325 (**Fig. S5B**). To determine the extent to which rDEGs are private to individual donors or represent shared  
326 features of variability within conserved cell types, we analyzed the consistency of neocortical rDEGs  
327 across the three donors that had been sampled at all eight neocortical locations (**Table S3**). Our findings  
328 revealed that 55% and 39% of glutamatergic and GABAergic rDEGs, respectively, were consistent  
329 among donors, while only 24% and 14% of astrocyte and oligodendrocyte rDEGs, respectively, were  
330 shared between donors. These results indicate lower inter-individual consistency in regional gene  
331 expression signatures in non-neuronal cells.

### 332 *A hypothalamic-origin neuron type in medial amygdala*

333 In mammalian CNS, some cell types migrate long distances from proliferative zones to their mature  
334 destinations (42, 43). However, neurons generally tend to respect cephalic boundaries and remain within  
335 the same subdivision as their progenitors (44). This tight control over migration potential makes it  
336 difficult to disentangle the persistent influence of developmental origin from potential later influences  
337 arising from shared tissue context that might affect all neurons similarly in a given brain structure.  
338 However, cephalic boundary crossings do exist (28, 29, 45). Though rare, such boundary crossing events



339 can reveal whether cell types that embarked on cross-cephalic migration retain transcriptomic profiles  
340 more in common with their tissues of origin, or more in common with their final destinations.

341  
342 We found a striking example of cross-cephalic migration in the amygdala. First, we observed an  
343 unexpected clustering pattern in our analysis, wherein three amygdala neuron types joined a clade not  
344 with other telencephalic neurons, but instead with *SLC17A6*+ hypothalamic and basal forebrain types  
345 (**Fig. 3A**). Moreover, despite expressing *SLC17A6* and lacking expression of *GAD1* and *GAD2*, these  
346 cells showed a closer association with GABAergic rather than glutamatergic types (**Fig. 3B**). They did not  
347 express other genes required for GABAergic transmission such as *SLC32A1* (VGAT) and also lacked the  
348 molecular machinery for non-canonical GABA reuptake or release observed in other cell populations  
349 (**Fig. S3**)(46, 47). These findings suggest that these particular amygdalar neurons exhibit a "cryptic"  
350 transcriptomic identity, in which they are glutamatergic but have transcriptomic profiles that are much  
351 more similar to GABAergic types, relative to other telencephalic neurons.

352  
353 The "cryptic" amygdalar subtypes display additional atypical gene expression features compared to other  
354 amygdala neuronal types, including expression of *OTP* and *SIMI* (**Fig. 3B**). These transcription factors  
355 are typically expressed in neuronal lineages originating from proliferative zones around the third  
356 ventricle. In mice, there is a migratory stream of diencephalic neurons into the telencephalon (45, 48) into  
357 the medial amygdala, and this migration is dependent on *Otp* expression (45) (**Fig. 3D**). We generated  
358 mouse amygdala snRNA-seq data from 53,745 nuclei and verified the presence of a *Sim1*+ neuron type in  
359 mice that also clusters with GABAergic neurons and expresses *Slc17a6* but not *Gad1* or *Gad2* (**Fig. 3C**).  
360 In mice, these neurons constitute the majority population in the amygdala that express *Adcyap1* (encoding  
361 the protein PACAP) (**Fig. 3C**), a neuropeptide that is extensively (but not exclusively) expressed in  
362 hypothalamic populations (49) and associated with energy homeostasis (50), stress, anxiety (51), and  
363 immune responses (52). (In marmosets, *ADCYAPI* is additionally expressed in subsets of *SLC17A7*+  
364 neurons that do not share the "cryptic" phenotype, indicating that *ADCYAPI* has a distinct distribution of  
365 expression in amygdala neurons between mice and marmosets.)

366  
367 We further confirmed the expression of *Sim1*+ cells in the medial amygdala in mice using the Allen  
368 Institute ISH atlas (**Fig. 3E**). To precisely locate the specific amygdalar nuclei housing the cryptic  
369 population, we investigated the expression of *SIMI* in neonatal marmosets (53, 54). *SIMI* expression was  
370 highly enriched in the neonatal marmoset medial amygdala (MeA) (<https://gene-atlas.brainminds.jp>; **Fig.**  
371 **3F**), which mirrors the migration of *Sim1*+ neurons from the diencephalon in mice (28). We verified  
372 *SIMI* and *SLC17A6* but not *SIMI* and *GAD1* colocalization in adult marmoset medial amygdala using  
373 single-molecule fluorescence *in situ* hybridization (smFISH) (**Fig. 3G**). These results suggest that the  
374 cryptic amygdala neurons are a conserved population in both mice and primates that likely have  
375 diencephalic origins. Consistent with a "birthplace imprinting" effect, they retain transcriptional identities  
376 more similar to diencephalic types than to the telencephalic types with which they ultimately reside (**Fig.**  
377 **3A**).

### 378 *Primate-specific striatal TAC3+ interneurons are similar to specific TAC3+ diencephalic types*

379 Previously, we discovered a *TAC3*+, *LHX6*+ interneuron subtype in the striatum of humans, macaques,  
380 and marmosets that was absent in mice and ferrets (3). Compared with other striatal types, they are  
381 transcriptionally most similar to *PVALB*+ interneurons and, because they expressed transcription factor

382 *LHX6*, we surmised that they likely also arose from the medial ganglion eminences (MGE) (3). Consistent  
383 with this inference, a recent study of fetal macaque single nucleus RNA-seq data from ventral  
384 telencephalic progenitor domains found that *TAC3*<sup>+</sup> striatal interneurons likely arise from progenitors in  
385 the MGE, and diverge from an ancestral progenitor class that also gives rise to conserved *MAF*<sup>+</sup>  
386 progenitors that produce *PVALB*<sup>+</sup> and *TH*<sup>+</sup> striatal interneurons (33).

387  
388 The broader census of brain structures in the current dataset allowed us to compare the transcriptional  
389 identity of the striatal *TAC3*<sup>+</sup> type to cell types outside of the striatum. Beyond expression in the striatal  
390 type, *TAC3* is expressed in 20 different neuron types in our dataset, including expression in cortical  
391 GABAergic neurons as well as several amygdala, basal forebrain, thalamic, and hippocampal types (**Fig.**  
392 **3H**; **Fig. S3**, **Fig. 6A,B**). *TAC3*<sup>+</sup> types did not form a single clade in the dendrogram, and their  
393 transcriptional resemblance to other neuron types largely reflected their tissue or cephalic origin. For  
394 example, thalamic *TAC3*<sup>+</sup> subtypes were found in a thalamic-only clade, while hippocampal *TAC3*<sup>+</sup>  
395 neurons were most similar to other hippocampal and amygdala types. The thalamic types were *SLC17A6*<sup>+</sup>  
396 while all other *TAC3*<sup>+</sup> types were GABAergic.

397  
398 Unexpectedly, the striatal *TAC3*<sup>+</sup> type was most similar not to other striatal interneuron types as we  
399 previously concluded (3), but rather to two other *TAC3*<sup>+</sup> GABAergic types found in basal forebrain and  
400 hypothalamus (**Fig. 3H**, tissue validation in **Fig. S6A**, **Data S2**). The broader clade containing these three  
401 types (depicted by green arrowhead in **Fig. 3H**) consisted entirely of basal forebrain and hypothalamic  
402 types, with the exception of the striatal *TAC3*<sup>+</sup> type. Each of the similar *TAC3*<sup>+</sup> populations had distinct  
403 gene expression (such as high expression of *OXT* and *AVP* in the hypothalamic type, and *DRD2*  
404 expression exclusively in the striatal type), ruling out dissection contamination (**Fig. 3I**). The 3 types  
405 remained direct neighbors when the dendrogram was recomputed using other distance metrics (e.g.  
406 correlation-based or PCA scores using transcription factor expression, see **Fig. S2**). As this clade  
407 assignment was unexpected, we omitted the basal forebrain and hypothalamic *TAC3*<sup>+</sup> types and  
408 recomputed the dendrogram (retaining 286 of the original 288 neuronal types) to determine whether the  
409 striatal *TAC3*<sup>+</sup> was broadly more similar to hypothalamic types than to telencephalic types (**Fig. 6C**). As  
410 striatal interneurons are generally divergent from hypothalamic/basal forebrain types, omitting these two  
411 cell types enabled us to test whether the *TAC3*<sup>+</sup> striatal type is broadly more similar to hypothalamic  
412 neurons or to striatal neurons. The global structure of the dendrogram was essentially the same as the  
413 original, except that the striatal *TAC3*<sup>+</sup> type now joined the major telencephalic GABAergic clade with  
414 other striatal interneurons (neighboring the striatal *PVALB*<sup>+</sup> subtype) (**Fig. 6C**), recapitulating our  
415 original similarity assignment (3).

416  
417 Considering their unexpected transcriptional similarity to both a telencephalic (basal forebrain) and a  
418 diencephalic (hypothalamus) type, the *TAC3*<sup>+</sup> striatal type may either arise from a telencephalic  
419 progenitor (33) that also gives rise to sister diencephalic (hypothalamic) types, or else shows striking  
420 transcriptional convergence with diencephalic types that have distinct developmental origins. Favoring a  
421 telencephalic origin as suggested by previous report (33), the hypothalamic, basal forebrain and striatal  
422 *TAC3*<sup>+</sup> types are all *FOXG1*<sup>+</sup>, a transcription factor associated with telencephalic origin (**Fig. 3I**). They  
423 also express *LHX6*<sup>+</sup> and *NKX2-1*<sup>+</sup> (**Fig. S3**), consistent with a medial ganglionic eminence origin,  
424 however we note that in mice some hypothalamic types also express *Nkx2-1* and *Lhx6* (9, 55, 56).

425 Ultimately, lineage tracing of the striatal *TAC3+* type in a primate would resolve whether a shared  
426 progenitor gives rise to both telencephalic and diencephalic types.

#### 427 *Quantitative maps of interneuron distribution across primate neocortex and striatum*

428 Our analysis of RNA expression in the single nucleus dataset indicates that developmentally-linked  
429 telencephalic GABAergic populations (42, 43) retain globally similar identities in adulthood. For  
430 example, *SST+* striatal interneurons are more similar to *SST+* hippocampal and neocortical interneurons  
431 than they are to other striatal types (**Fig. S3**). Within each brain structure, developmentally linked  
432 populations become functionally specialized and follow distinct spatial rules for their allocation. In the  
433 mouse, quantitative imaging of molecularly identified interneuron types has revealed that densities of  
434 *Sst+*, *Vip+*, and *Pvalb+* cortical interneurons vary across the cortical mantle; their relative proportions  
435 relate to unique functional and microcircuit properties of different cortical areas (15). In primates, overall  
436 neuron densities are more variable by cortical location than in mice: they vary by as much as 5 fold across  
437 the cortical sheet, with highest neuron proportions and densities found in occipital cortex and particularly  
438 in V1 (57). However, quantitative mapping of molecularly-defined subtypes of neurons have not been  
439 performed in a primate, and it is not known if they have conserved or distinct spatial distributions  
440 compared to mice.

441  
442 We used smFISH to image the major cortical and striatal interneuron types across sagittal sections in  
443 marmoset (**Fig. 4** and **Fig. S7-9**). We quantified proportions and densities of each type relative to all cells  
444 (DAPI; **Fig. S7**). In the neocortex, we binned these using an areal parcellation of marmoset neocortex  
445 (<https://doi.org/10.24475/bma.4520>) to determine whether interneuron proportions varied systematically  
446 by brain area. In total, we quantified 377,554 neocortical interneurons across 30 sections by smFISH. In  
447 striatum, we quantified 6,848 interneurons across 32 sections. Each series sampled sagittal sections ~160  
448  $\mu\text{m}$  apart, beginning 1,184-1,584  $\mu\text{m}$  from the midline up to 6,384  $\mu\text{m}$  laterally, including the majority of  
449 the striatum with the exception of the most-lateral portion of the putamen. We used a cell segmentation  
450 algorithm to count positive cells across sagittal sections and expressed interneuron proportions as a  
451 percent of all cells (DAPI+).

452  
453 Neocortical types were identified with probes for *SST*, *PVALB*, *CXCL14*, *VIP*, and *LAMP5* (**Table S4**),  
454 which collectively account for all major cortical interneuron populations (**Fig. 4A**). *CXCL14* is a marker  
455 for caudal ganglionic eminence derived cortical interneurons. It is expressed in most *VIP+* and *LAMP5+*  
456 cortical neurons, as well as a smaller population of *VIP-*, *LAMP5-* types, some of which are *PAX6+* (and  
457 which correspond to the *SNCG+* population in humans and mice (2, 3)). *VIP+* and *LAMP5+*  
458 interneurons are the two other major CGE-derived populations present in primates and mice. As *LAMP5*  
459 is also expressed in subsets of excitatory neurons, we performed dual labeling smFISH with *GAD1* to  
460 avoid counting glutamatergic types. Major striatal interneuron types were identified with probes for *SST*,  
461 *PVALB*, *CHAT/SLC5A7*, *TH*, *CCK*, and *TAC3* (**Table S4**). These together account for most major  
462 populations of non-SPN neurons in the striatum, with the exception of a population of *MEIS2+*  
463 GABAergic striatal neurons that cluster together with non-SPN GABAergic neurons (**Fig. 1C**, **Fig. S3**)  
464 but are difficult to distinguish uniquely as several other markers are also expressed at variable levels in  
465 other striatal cell types.

#### 466 *Neocortical interneuron types have highly focal biodistributions*

467 Quantitative analysis of smFISH revealed highly focal and variable distributions of interneuron subtypes  
468 across marmoset neocortex (**Fig. 4B-E, Fig. S8A-D**). In both absolute numbers and relative proportions,  
469 *PVALB*<sup>+</sup> interneurons were strongly enriched in the occipital lobe, particularly along the calcarine sulcus  
470 in the medial sections, as well as the occipital pole more laterally (**Fig. 4B-C; Fig. S8A, Data S1**). *SST*<sup>+</sup>  
471 interneurons in the neocortex increase medio-laterally (**Fig. 4B-C, Fig. S8A, Data S1**), but closer  
472 inspection revealed this is driven not by a spatial gradient so much as by highly focal enrichments around  
473 primary motor area (M1) and primary somatosensory cortex (S3, S1/2), the cingulate cortex, entorhinal  
474 cortex and medial prefrontal cortex (**Fig. 4C**). *CXCL14*<sup>+</sup> neurons are enriched along the calcarine sulcus  
475 medially, as well as in ventral aspects of the occipital cortex more laterally. There are higher proportions  
476 dorsomedially in the parietal cortex (**Fig. 4C**). *VIP*<sup>+</sup> neurons were enriched in PFC and also increased  
477 laterally at or near somatosensory cortex and posterior parietal cortex (**Fig. 4C**). *LAMP5*<sup>+</sup> interneurons  
478 showed a bias to the top of the cortical layers, consistent with dominant composition of this class as  
479 neurogliaform Layer 1 types (3, 58, 59), though this class also contains the *LAMP5/LHX6* type that is  
480 found in deeper layers (3, 13) (**Fig. 4C**).

481  
482 To better appreciate how these distributions relate to neocortical areas, we used a histologically-based  
483 marmoset neocortical parcellation (<https://doi.org/10.24475/bma.4520>; **Fig. S8B-C**) to bin smFISH  
484 interneuron proportions by cortical area (**Fig. 4D-E; Fig. S8B**). Small adjacent areas were merged,  
485 resulting in 26 areal groupings (**Fig. S8C**). Overall interneuron proportions relative to all cells varied by  
486 4.5-fold across areal groupings (**Fig. 4D-E, Fig. S8B-C**). As a fraction of all cells, A31 (dorsal posterior  
487 cingulate) had the lowest overall proportion of interneurons (3%), while insular cortex (In) had the  
488 highest (17%) (**Fig. 4D**).

489  
490 In mice, quantitative mapping of interneuron densities showed higher *Sst*<sup>+</sup> densities and lower *Pvalb*<sup>+</sup>  
491 densities in neocortical areas involved in higher cognitive functions, such as medial frontal and lateral  
492 association areas (15). This local circuit feature follows cortico-cortical connectivity network topography  
493 in mouse (60). In contrast, lower *Sst/Pvalb* ratios were associated with mouse primary motor and sensory  
494 areas, which are associated with less distributed (and more local) cortical connectivity (15). To determine  
495 whether primate neocortex followed similar rules as mouse neocortex of interneuron allocation, we  
496 examined normalized proportions of the four largely mutually exclusive interneuron classes (*PVALB*<sup>+</sup>,  
497 *SST*<sup>+</sup>, *LAMP5*<sup>+</sup>, *VIP*<sup>+</sup>) within our marmoset areal groupings (**Fig. 4D-E; Fig. S8B**). Lateral temporal  
498 cortex, including A36, had the highest *SST/PVALB* ratio. Other areas with high *SST/PVALB* ratios  
499 included piriform cortex (Pir), M1 and several medial/orbitofrontal areas (A25, A13, A32). This suggests  
500 that some marmoset association areas, notably medial frontal area and lateral temporal cortex, have high  
501 *SST/PVALB* ratio composition consistent with high *Sst/Pvalb* ratios in higher order association network in  
502 mice (15) (**Fig S8B**).

503  
504 Strikingly, polar and lateral prefrontal areas (including A8, A46, A10, A47, A45), which are thought to be  
505 the most divergent relative to prefrontal areas in rodents (61), and which in primates are characterized by  
506 long-range cortico-cortical connectivity to other association areas (62–64), do not exhibit high  
507 *SST/PVALB* ratios (**Fig. 4D-E; Fig. S8B**). Of all cortical areal groupings we measured, the lowest  
508 *SST/PVALB* ratio was found in A45, a higher-order lateral prefrontal area with extensive projections to all  
509 lobes of the neocortex (64); <http://analysis.marmosetbrain.org/>). Thus, unlike the high *Sst/Pvalb* ratios  
510 observed in frontal areas in mouse (15), primate lateral prefrontal areas are characterized not by



511 exceptional *SST/PVALB* ratios but rather as having some of the highest *VIP+* interneuron proportions  
512 (**Fig. 4D-E; Fig. S8B**). Lateral prefrontal areas also have the highest total fraction of *VIP+* and  
513 *LAMP5/GAD1+* interneurons (all above 50% of all interneurons); both of these populations  
514 predominately arise from the caudal ganglionic eminence, a progenitor zone that has expanded in primate  
515 evolution (65). These results suggest that primate lateral prefrontal areas do not follow the same local  
516 cortical circuit organizing principles that typify frontal areas in the mouse (15), or medial frontal areas in  
517 marmoset (**Fig. 4D-E; Fig. S8B**).

#### 518 *Interneuron proportions in marmoset striatum follow medio-lateral gradients*

519 The striatum, a crucial brain region involved in motor control, reward, and decision-making, displays  
520 complex functional topography and connectivity. In humans, antero-medial portions containing nucleus  
521 accumbens/ventral striatum are functionally coupled to limbic and higher order cognitive networks, while  
522 lateral subdivisions are more coupled to sensory and motor networks (66). Prior work relating bulk gene  
523 expression measurements in human and macaque striatum to cortico-striatal network organization found a  
524 relationship between functional domain (e.g. somato/motor vs limbic network) and gene expression,  
525 including enrichment of *PVALB* in lateral portions of the striatum that are coupled to somatosensory and  
526 motor cortex (67). These results suggest that differences in local cell type composition across striatum  
527 may underlie aspects of its functional topography.

528  
529 In mice, striatal interneuron subtypes have different spatial distributions: cholinergic (*Chat+*) neuron  
530 proportions increase dorsally and anteriorly (68), *Pvalb+* interneurons are more abundant in dorsolateral  
531 striatum than in dorsomedial striatum, and *Sst+* interneurons are spatially homogeneous (69) (**Fig. S9A**).  
532 Primates retain the major populations of striatal interneurons found in mice (6, 70), and additionally have  
533 gained the novel type distinguished by *TAC3* expression (3, 33) described in previous sections (**Fig. 3H,**  
534 **4F**). A systematic quantification of striatal interneuron types has not been performed comprehensively in  
535 a primate, and it is unknown if they follow similar or distinct spatial distributions observed in mice. We  
536 used single-molecule FISH (smFISH) to investigate distributions of the major types of conserved striatal  
537 interneurons (*SST+*, *PVALB+*, *SLC5A7+/CHAT+*, *TH+*, *CCK+*, *TAC3+*, probes in **Table S4**) in serial  
538 sagittal sections of marmoset striatum (**Fig. 4G-H**).

539  
540 Each striatal interneuron population exhibited a non-uniform distribution across the marmoset striatum,  
541 particularly in the medial-lateral axis. Similar to mice, the proportion of striatal *PVALB+* interneurons  
542 increases in lateral sections, from ~0% to 0.8% of all cells (**Fig. 4G, Data S1**). Unlike mice, marmoset  
543 *SST+* interneuron distribution is non-uniform, appearing sparse near the midline and increasing in  
544 proportion (0.1-0.7%; **Fig. 4G, Data S1**). Cholinergic neurons (*CHAT+*) show the opposite medial-lateral  
545 gradient (0.45%-0.1%; **Fig. 4G, Data S1**). Similar to *CHAT+* neurons, *TH+* striatal interneurons, which  
546 are transcriptionally similar to the *PVALB+* type, exhibited a decreasing medial-lateral gradient (**Fig. 4G,**  
547 **Data S1**). *CCK+* striatal interneurons, which are a minority population in marmoset (3) and mouse (70)  
548 are enriched close to the midline and become much sparser laterally (**Fig. 4G, Data S1**). The *TAC3+*  
549 interneurons showed an increasing medial-lateral gradient, similar to *CHAT+* neurons (2%-0.5%; **Fig.**  
550 **4G, Data S1**). No striatal population exhibited anterior-posterior or dorsal-ventral gradients with the  
551 exception of *PVALB* interneurons, which showed a modest dorsal-ventral gradient. Unlike striatal  
552 interneurons, MSNs proportions were largely uniform across the major axes: *DRD1* and *DRD2*, which  
553 distinguish direct and indirect MSNs, respectively, were slightly enriched medially but otherwise



554 exhibited largely uniform distributions across the striatum (**Fig. S9B**). Overall, these findings suggest that  
555 the spatial distribution of interneuron subtypes within the primate striatum may play a role in shaping its  
556 functional topography and connectivity. While mice and primates share similar striatal interneuron  
557 populations, there are also differences in their spatial distributions.

### 558 *Morphology of conserved neocortical and striatal interneuron types*

559 The morphology of interneuron types relates essentially to their function and contributions to neural  
560 circuits. While methods such as biocytin filling and Golgi staining are the gold standard for  
561 morphological reconstructions, the administration of low-titer AAVs carrying membrane-bound  
562 fluorescent reporters can be used to sparsely label cells for morphological reconstruction. We utilized a  
563 reporter AAV under the control of the forebrain interneuron-specific mDlx enhancer (19) to label  
564 neocortical and striatal interneurons, and then performed smFISH (probes in **Table S4**) on thick sections  
565 (120  $\mu\text{m}$ ) to confirm the molecular identity of GFP+ cells. Reconstructions using viral labeling are more  
566 challenging than with single cell filling methods, because GFP expression from neighboring cells and  
567 passing fibers have to be distinguished from signal attributable to the target cell. In some cases, the GFP  
568 signal appears punctate, making it challenging to follow discontinuous processes. For these reasons, our  
569 reconstructions are conservative: as we aimed to avoid reconstructing false positive fibers (fibers  
570 originating from other cells), we may in some cases under-ascertain the full dendritic arborization of  
571 target cells.

572  
573 We imaged 1,203 GFP+ neurons in the striatum and 4,374 GFP+ neurons in the neocortex. We used  
574 NeuTube to reconstruct the top 216 telencephalic neurons that had the best GFP signal, did not have other  
575 cells labeled in the field of view, and were positive for at least one smFISH probe (**Table S5; examples**  
576 **in Fig. S10**). Raw image stacks and NeuTube reconstructions are available at  
577 <https://doi.org/10.35077/g.609>. Using combinations of 1-2 probes for marker genes of different types, we  
578 identified GFP+ neocortical and striatal interneurons, respectively, with smFISH based on their type  
579 markers (neocortex: *SST*, *PVALB*, *CXCL14*, *VIP*, *LAMP5*; striatum: *SST*, *PVALB*, *SLC5A7*, *TH*, *CCK*,  
580 **Table S4**) (**Fig. 5A-B, top rows**). We used a second tracing and reconstruction method (Imaris) on the 41  
581 most complete GFP+ cells. Of these, we discarded 5 due to incomplete soma or highly discontinuous  
582 processes in the image stack, retaining 36 cells (**Fig. 5A-B, bottom rows; Table S6**). Morphological  
583 parameters were measured using the Surface function, which detects surface area and volume based on  
584 the fluorescence of the mDlx-AAV-GFP expression, and the Filament Tracer function, which traces  
585 structural features starting from the soma to the terminal processes based on the diameter of the soma and  
586 the thinnest projection of the cell (**Table S6**). To assess whether there are region-dependent  
587 morphological differences within molecularly similar types, we compared several parameters between a  
588 collection of neocortical and striatal *PVALB*+ GFP+ cells that were reconstructed from the same  
589 marmoset (Cj 17-154; **Fig. 5C-D**) to avoid variable tissue shrinkage arising from different tissue storage  
590 conditions across the animals (see *Methods*). Striatal *PVALB*+ GFP+ cells were larger than cortical  
591 *PVALB*+ GFP+ cells in terms of length, area, but not soma diameter or the volume of GFP+ fluorescence  
592 (**Fig. 5D**). While the number of branches issued by their somas also did not differ, the striatal *PVALB*+  
593 GFP+ interneurons exhibited more dendritic branch points than their cortical counterparts (**Fig. 5D**),  
594 suggesting that striatal *PVALB*+ interneurons have greater arborization than *PVALB*+ cortical  
595 interneurons.

596 *Development of a novel TAC3-rAAV-GFP reporter*

597 Given that the *TAC3*<sup>+</sup> type comprises almost 30% of striatal interneurons in marmoset, we expected a  
598 sizable proportion of striatal GFP<sup>+</sup> cells labeled by AAV9-hDlx5/6-GFP-fGFP (**Fig. 5**) to be *TAC3*<sup>+</sup>.  
599 However, while 55 GFP<sup>+</sup> striatal cells were imaged across all smFISH *TAC3*-probe treated sections, we  
600 failed to find any colocalization with *TAC3* transcripts. In these experiments, which were double-labeled  
601 with *TAC3* and *PVALB* probes, 9/55 were *PVALB*<sup>+</sup> (16% *PVALB*<sup>+</sup>, vs expected 21% of interneurons  
602 expected from snRNA-seq proportions), while 0/55 were *TAC3*<sup>+</sup> (0% vs 28% expected from snRNA-  
603 seq).

604

605 The mDlx enhancer is a regulatory element specific to forebrain interneurons (71). Though the regulatory  
606 element, and the forebrain-interneuron expressed genes flanking it, *Dlx5* and *Dlx6*, are highly conserved  
607 in vertebrates, we wondered whether the lack of accessibility of the mDlx locus in the *TAC3* interneurons  
608 could explain our inability to find colocalization of *TAC3* expression and GFP. To assess this, we  
609 generated single nucleus ATAC-seq (snATAC-seq) data (69,808 nuclei) from fresh marmoset striatum  
610 (**Fig. 6A**). We used Signac (72) to integrate our previously annotated striatal snRNA-seq data and identify  
611 major striatal types. We then examined accessibility of the marmoset sequence homologous to the mDlx  
612 locus across interneuron types. While other striatal interneuron types (particularly the *SST*<sup>+</sup> and *PVALB*<sup>+</sup>  
613 types) showed accessibility (ATAC-seq peaks, reflecting chromatin accessibility) at the mDlx locus, the  
614 *TAC3*<sup>+</sup> type did not (**Fig. 6B**).

615

616 To develop a viral tool that could transduce the striatal *TAC3*<sup>+</sup> cell type, we next nominated new  
617 candidate regulatory elements specific to the *TAC3*<sup>+</sup> interneuron type. We used Signac to identify  
618 differentially accessible peaks in the *TAC3*<sup>+</sup> cluster relative to all others, and filtered the set by fold  
619 change, percent accessibility across the target cell type population, and peak size (**Fig. 6C**). To maximize  
620 the likelihood of obtaining a functional reporter while minimizing the number of marmosets used, and  
621 because several of our top candidates were very short, we selected four top regulatory element candidates  
622 for the *TAC3*<sup>+</sup> type for tandem packaging (see *Methods*). The four candidates were on four different  
623 chromosomes and spanned between 94-215 bp. One site was in an exon of *CDH13*, one was in the first  
624 exon of *TAC3*, one was in an exon of *LOC108592287*, and one was intergenic (closest gene 200kb  
625 distance). These four elements were packaged in tandem in an AAV9 vector (AAV9-tandemE-TAC3-  
626 EGFP) containing a cytoplasmic GFP reporter (**Fig. 6D**). We delivered the virus via MRI-guided local  
627 injection into the anterior striatum of two marmosets (Cj 19-207 and 17-B111, **Fig. 6E and Fig. S11A**,  
628 **Table S1**), and imaged coronal sections of striatum for GFP positive cells after 6 & 10 weeks' incubation  
629 time (**Fig. 6F and S11C**). smFISH confirmed colocalization of *TAC3* transcripts in GFP<sup>+</sup> neurons in  
630 striatum (**Fig. 6G and Fig. S11B,D**). In one animal the virus diffused beyond the boundary of the  
631 striatum. In this animal we also detected strongly labeled GFP<sup>+</sup> cells in a border zone between striatum,  
632 BNST, and the globus pallidus where the viral injection had diffused beyond striatum (**Fig. S11B-E**), and  
633 smFISH confirmed that these too were *TAC3*<sup>+</sup>.

634

635 To determine the broader biodistribution of cells transduced by the tandemE-TAC3 enhancer, we next  
636 packaged the same enhancers in a novel AAV capsid (BI103) capable of efficient transduction of brain  
637 cell types after systemic IV delivery in marmosets (Chan et al, in prep). We delivered this AAV (AAV-  
638 BI103-tandemE-TAC3-EGFP) to one marmoset (Cj 20-214, **Table S1**). After a 4 week incubation, the  
639 brain was perfused, sliced and stained with anti-GFP antibody to amplify GFP signal, and smFISH probes

640 against *TAC3*<sup>+</sup> to confirm colocalization. We found GFP<sup>+</sup>/*TAC3*<sup>+</sup> colocalized cells in striatum as well as  
641 several extra-striatal locations including hypothalamus, substantia nigra, superior colliculus, brainstem,  
642 and neocortex (**Fig. 6I**). To assess the morphology of *TAC3*<sup>+</sup> striatal interneurons produced by viral  
643 labeling, we reconstructed several of the most complete cells from both the local injections (AAV9-  
644 tandemE-*TAC3*-EGFP) and from the systemic injection (AAV-BI103-tandemE-*TAC3*-EGFP) using  
645 Imaris (**Figs. 6H,J,K** and **Table S6**). The cells tended to have 2-3 thick branches that extended from the  
646 soma, and which bifurcated close to the soma and became thinner thereafter. Reconstructed cells had  
647 median 13.1  $\mu\text{m}$  (+/- 5.1 s.t.d) soma diameter, 2221.3 volume ( $\mu\text{m}^3$ ; +/- 1192.8 s.t.d) and 16.5 (+/- 6.11)  
648 total dendritic branch points. These experiments show that whereas systemic injections of AAV9 under  
649 the mDlx enhancer could not transduce the striatal *TAC3*<sup>+</sup> type, presumably due to loss of accessibility at  
650 the mDlx locus (**Fig. 6B**), local injections of AAV9 as well as systemic injections with alternative capsid  
651 with the cell type targeted enhancers were successful. Broadly, the use of cell type specific regulatory  
652 elements, coupled with viral engineering, enables a new horizon for the study of primate brain cell types.

## 653 Discussion

654 In this study, we generated a molecular and cellular census of the adult marmoset brain using single-  
655 nucleus RNA sequencing, quantitative smFISH, and cell type specific AAV labeling. Our study reveals  
656 the complex repertoire of cell types in the marmoset brain. Our snRNA-seq dataset of over 2.4 million  
657 brain cells across 18 brain regions in the marmoset indicates that lineage is an important factor shaping  
658 adult transcriptomic identity of neuronal types, apparently more so than neurotransmitter utilization.  
659 Using quantitative smFISH we revealed, for the first time in a primate, the spatial distributions of  
660 molecularly-resolved GABAergic interneuron types. Using GFP delivered by interneuron-specific AAVs,  
661 we generated morphological reconstructions of all major interneuron types in the neocortex and striatum.  
662 We generated a novel viral genetic tool under the control of cell type specific regulatory elements to  
663 transduce a previously described putative primate-specific striatal interneuron type. These datasets,  
664 generated as part of the BRAIN Initiative Cell Census Network, complement other recent and extensive  
665 cellular profiling studies in other species (8–11, 73) and will enable insights in cell type innovations and  
666 modifications in future comparative studies.

667 Telencephalic glutamatergic and GABAergic neurons strongly segregate in mammals as well as in  
668 homologous structures in amphibians (26), suggesting an evolutionarily conserved distinction. An initial  
669 atlas in mouse indicated that glutamatergic and GABAergic neurons from diencephalic and midbrain  
670 structures also partition almost perfectly by neurotransmitter usage (7), suggesting this could be a general  
671 rule. However, more recent transcriptomic censuses in mouse (8, 9) and human (11) indicate that across  
672 mammalian species, many non-telencephalic glutamatergic and GABAergic types tend to form highly  
673 intermixed clades that do not separate clearly by neurotransmitter identity. Our results in the adult  
674 marmoset (and mouse, **Fig S2**) concord with the notion that gene expression distinctions between  
675 telencephalic glutamatergic and GABAergic neurons do not hold for neurons in other brain structures  
676 (**Fig. 1; Fig. S2**). This has implications for generalizing transcriptomic associations to other phenotypes.  
677 For example, transcriptomic changes in glutamatergic or GABAergic neurons have been associated to  
678 diseases such as autism and schizophrenia (74–76). Such associations may not generalize to GABAergic  
679 or glutamatergic types outside of the sampled brain region (usually neocortex), consistent with  
680 observations that “global” changes to glutamatergic or GABAergic neurons in relation to disease actually  
681 often only surface in a few brain regions (77).

682 A previous analysis, based on shared patterns of several key transcription factors, proposed that  
683 telencephalic GABAergic neurons are developmentally and evolutionarily related to diencephalic  
684 GABAergic neurons (78). Our results indicate that when profiled at adulthood, only a limited number of  
685 telencephalic GABAergic types are transcriptionally similar to diencephalic types, some of which may  
686 arise from cephalic boundary crossings. Most neocortical, hippocampal, and some amygdalar and striatal  
687 GABAergic types are so distinct from diencephalic GABAergic types that they share more gene  
688 expression in common with telencephalic glutamatergic types (**Fig. 1C**).

689 Developmental origin or shared lineage plays a strong role in shaping the adult transcriptomic identity of  
690 neurons, but phenotypic convergence, whereby adult cell types converge on similar transcriptomic  
691 identities despite a non-shared developmental origin, may also drive apparent similarities amongst cell  
692 types. Recent advances in lineage tracing coupled with single cell RNA sequencing demonstrates that  
693 phenotypic convergence is surprisingly common between transcriptomically defined types (5, 79). As  
694 such, it is difficult to disambiguate between these possibilities in absence of data that confirm lineage  
695 directly (5, 26). For example, in our data the clade of GABAergic projection neurons that contains striatal  
696 SPNs and amygdala and basal forebrain *GAD1+*, *FOXP2+* neurons also contained several subtypes of  
697 hypothalamic *GAD1+*, *FOXP2+* neurons (**Fig. 1C**; **Fig. S2E**, **Fig. S3**). Either these hypothalamic  
698 *FOXP2+* subtypes have a convergent expression identity with long-range GABAergic projection neurons  
699 of the telencephalon, or else they arise from a common lineage.

700 Our data support known instances of cross-cephalic migrations in thalamus and amygdala, and also  
701 suggest new ones (**Fig. 3**). The similarity of the primate-specific *TAC3+* striatal type to hypothalamic and  
702 basal forebrain *TAC3+* types in particular is unexpected (**Fig. 3H**) and suggests a potential example of  
703 cross-cephalic vesicle migration. Recent work (33) proposes that the striatal *TAC3+* type has a ventral  
704 ventricular telencephalic origin, similar to most other GABAergic interneuron types destined for striatum.  
705 While phenotypic convergence remains possible, another possibility is that a ventral telencephalic  
706 progenitor gives rise to both telencephalic and diencephalic types. This is supported by the expression of  
707 *FOXG1*, a transcription factor necessary for ventral telencephalic fate (80), in all three transcriptionally  
708 similar *TAC3+* populations.

709 Developmentally linked interneuron populations in striatum and neocortex (e.g *PVALB+* types in both  
710 structures) displayed distinct spatial distributions measured by cell counting of smFISH (**Fig. 4**). While  
711 all interneuron subtype distributions in the striatum followed a gradient along a medial-lateral axis, the  
712 interneurons in the neocortex followed much more complex distributions that for the most part were not  
713 captured by simple gradients. While in the mouse, *Sst+/Pvalb+* ratios are a hallmark of higher order  
714 cortex (15), we found a different pattern of relative interneuron proportions across much of the higher-  
715 order association cortex in marmosets. Areas in the lateral prefrontal cortex were unique in their relatively  
716 high proportions of *VIP+* neurons (and had unexceptional or even low ratios of *SST+/PVALB+* neurons).  
717 These results suggest that primate lateral prefrontal areas may not follow the same local cortical circuit  
718 organizing principles of association cortex in the mouse.

719 Morphological characterization of the striatal and neocortical interneuron populations suggests variation  
720 in overall size and dendritic arborization amongst subtypes. To avoid interindividual and technical  
721 variability arising from different sample storage conditions (see Methods), we analyzed several  
722 morphological parameters in a subset of cortical and striatal *PVALB+* interneurons reconstructed from a  
723 single marmoset (**Figs. 5C-D**). Striatal *PVALB+* cells were found to be larger in length, volume, and  
724 surface area and consisted of more dendritic branch points than the cortical cells. Our data altogether



725 suggest that the striatal *PVALB*<sup>+</sup> interneurons exhibit higher dendritic complexity compared to their  
726 respective counterparts in the neocortex. These morphological differences could result in differing  
727 electrophysiological properties. For example, it is possible that *PVALB*<sup>+</sup> cells in the striatum have higher  
728 capacitance and receive more synaptic inputs onto them, thereby impacting local signal integration and  
729 computation, than cortical *PVALB*<sup>+</sup> interneurons. The functional significance of morphological  
730 differences across the interneuron subtypes identified in our study will ultimately require studying how  
731 these cells affect the circuits in which they reside (i.e., cellular/subcellular targeting biases and functional  
732 properties)(81–83).

733 The development of virally-based tools enables cell-type-specific access in nonhuman primates (2, 18–  
734 20). To maximize translatability across species, most approaches nominate candidates using evolutionary  
735 conservation (usually between mice and humans) as a selection criterion. However, the evolutionarily  
736 conserved mDlx enhancer did not drive expression in the novel striatal *TAC3*<sup>+</sup> type (**Fig. 6B**). In general,  
737 we observed that the mDlx enhancer selectively under-ascertained several interneuron populations in  
738 marmoset in these experiments. For example, it systematically under-labeled *VIP*<sup>+</sup> and *SST*<sup>+</sup> types in the  
739 neocortex (expected 22% and 26% of interneurons, obtained 2% and 3%, respectively), as well as *SST*<sup>+</sup>  
740 interneurons in the striatum (14%, obtained 1.8%). This underlabeling could in part be due to the titer and  
741 systemic delivery approach we adopted, which was necessary in order to achieve sparse labeling for  
742 morphology. The overall low efficiency in our ability to molecularly characterize GFP positive cells  
743 suggests a need for further optimization for this species and application.

744 The lack of transduction of *TAC3*<sup>+</sup> striatal interneurons using the AAV-mDlx virus prompted us to  
745 develop a novel AAV under the control of *TAC3*<sup>+</sup> interneuron striatal regulatory elements (**Fig. 6D-H**).  
746 The novel reporter virus (AAV9-tandemE-TAC3-EGFP) that we developed to study the striatal *TAC3*<sup>+</sup>  
747 type was driven by striatal *TAC3*<sup>+</sup> enhancer elements. When delivered systemically, the virus also labeled  
748 *TAC3*<sup>+</sup> neurons elsewhere in the brain, including in the hypothalamus, neocortex, substantia nigra. As  
749 neocortical *TAC3*<sup>+</sup> cells bear little resemblance to *TAC3*<sup>+</sup> striatal interneurons in terms of their global  
750 gene expression profiles (**Fig. 3H**), the widespread transduction of *TAC3*<sup>+</sup> neurons suggests that the  
751 regulatory elements that we identified in the *TAC3*<sup>+</sup> striatal type (defined only relative to other striatal  
752 cell types) may endogenously regulate the *TAC3* gene itself, or else a gene whose expression is highly  
753 correlated to *TAC3*.

754 Our study reveals the complex landscape of transcriptionally-defined cell types in the marmoset brain.  
755 Compared to mouse or other outgroup species, few primate lineage-gained cell types have emerged;  
756 likely more common is the redirection, repurposing, or elaboration of conserved types (2, 13, 33, 84, 85).  
757 The persistent fingerprint of developmental origin present in neuronal gene expression underscores  
758 important roles for novel neurogenic niches, developmental patterning and altered mechanisms guiding  
759 proliferation and cell migration in primate brain evolution that could be the subject of future study. For  
760 example, *in vivo* lineage tracing in primates could reveal the developmental origin of the striatal *TAC3*<sup>+</sup>  
761 type and its relationship to other *TAC3*<sup>+</sup> populations in other brain structures. We report the largest  
762 transcriptomic cell census of the marmoset brain and uncover the complex biodistribution of telencephalic  
763 interneurons by quantitative smFISH mapping. We present a compendium of morphological  
764 reconstructions of marmoset telencephalic interneurons, and describe new viral reagents for targeting and  
765 visualizing a primate-specific striatal interneuron type. Together, these resources will enable further  
766 comparative studies of the evolution and development of brain cell types.

767



768 METHODS

769 **Animals used for study**

770 *Marmosets*. Marmosets were pair-housed in spacious holding rooms with environmental control of  
771 temperature (23–28°C), humidity (40–72%), and 12 hr light/dark cycle. Their cages were equipped with a  
772 variety of perches and enrichment devices, and they received regular health checks and behavioral  
773 assessment from MIT DCM veterinary staff and researchers. All animal procedures were conducted with  
774 prior approval by the MIT Committee for Animal Care (CAC) and following veterinary guidelines.

775 *Mice*. Experimental mice were purchased from The Jackson Laboratory company and housed at the  
776 McLean hospital animal facility (3–5 mice per cage) on a 12:12 hr light-dark cycle in a temperature-  
777 controlled colony room with unrestricted access to food and water. All procedures were conducted in  
778 accordance with policy guidelines set by the National Institutes of Health and were approved by the  
779 McLean Institutional Animal Care and Use Committee (IACUC).

780 **Tissue processing for single nucleus sequencing and smFISH**

781 *Marmoset specimens for snRNA-seq*. Marmoset experiments were approved by and in accordance with  
782 Massachusetts Institute of Technology CAC protocol number 051705020. Adult marmosets (1.5–14.5  
783 years old, 12 individuals; **Table S1**) were deeply sedated by intramuscular injection of ketamine (20–40  
784 mg kg<sup>-1</sup>) or alfaxalone (5–10 mg kg<sup>-1</sup>), followed by intravenous injection of sodium pentobarbital (10–  
785 30 mg kg<sup>-1</sup>). When the pedal with-drawal reflex was eliminated and/or the respiratory rate was  
786 diminished, animals were trans-cardially perfused with ice-cold sucrose-HEPES buffer (3, 6). Whole  
787 brains were rapidly extracted into fresh buffer on ice. Sixteen 2-mm coronal blocking cuts were rapidly  
788 made using a custom-designed marmoset brain matrix. Slabs were transferred to a dish with ice-cold  
789 dissection buffer (3, 6). All regions were dissected using a marmoset atlas as reference(86), and were  
790 snap-frozen in liquid nitrogen or dry ice-cooled isopentane, and stored in individual microcentrifuge tubes  
791 at –80 °C.

792  
793 *Marmoset specimens for snATAC-seq*. Tissue from 1 marmoset (female, 1.5 y.o., **Table S1**) was used for  
794 both snRNA-seq and snATAC-seq (**Table S1**). Fresh tissue was dissected from anterior striatum  
795 (including caudate and putamen) and used immediately for snATAC-seq.

796  
797 *Mouse specimens for snRNA-seq*. Three adult (P80-90) male wild-type mice were deeply anesthetized  
798 with isoflurane and sacrificed by decapitation. Brains were quickly excised, washed in ice-cold sterile  
799 0.1M phosphate buffer saline (PBS) and dissected onto an ice-cold glass surface. Amygdala nuclei were  
800 identified and isolated using “The Allen mouse brain atlas” (<https://mouse.brain-map.org/static/atlas>,  
801 **Table S7**) as a reference for anatomical landmarks. The basolateral amygdaloid nucleus was exposed by  
802 performing two coronal cuts using the borders of *primary somatosensory cortex* and *primary visual*  
803 *cortex* as landmarks. Dissected specimens were collected in 1.5ml micro-centrifuge tubes, snap-frozen on  
804 dry ice, and stored at -80 °C until used.

805  
806 *Marmoset specimens for smFISH*. Two marmosets were deeply sedated by intramuscular injection of  
807 alfaxalone (5–10 mg kg<sup>-1</sup>) (**Table S1**), followed by intravenous overdose of sodium pentobarbital (10–  
808 30 mg kg<sup>-1</sup>). When the pedal with-drawal reflex was eliminated and/or the respiratory rate was

809 diminished, animals were trans-cardially perfused with ice-cold saline. The brain was immediately  
810 removed, embedded in Optimal Cutting Temperature (OCT) freezing medium, and flash frozen in an  
811 isopropyl ethanol-dry ice bath. Samples were cut on a cryostat (Leica CM 1850) at a thickness of 16 $\mu$ m,  
812 adhered to SuperFrost Plus microscope slides (VWR, 48311-703), and stored at -80 °C until use. Portions  
813 of the brain that were not cut were recoated in OCT and stored again for future use. Samples were  
814 immediately fixed in 4% paraformaldehyde and stained on the slide according to the Molecular  
815 Instruments HCR generic sample in solution RNA-FISH protocol (Molecular Instruments,  
816 <https://files.molecularinstruments.com/MI-Protocol-RNAFISH-GenericSolution-Rev7.pdf>) or the  
817 Advanced Cell Diagnostics RNAscope Multiplex Fluorescent Reagent Kit v2 Assay (ACD, 323100,  
818 [https://acdbio.com/sites/default/files/USM-  
819 323100%20Multiplex%20Fluorescent%20v2%20User%20Manual\\_10282019\\_0.pdf](https://acdbio.com/sites/default/files/USM-323100%20Multiplex%20Fluorescent%20v2%20User%20Manual_10282019_0.pdf)) protocol (**Table  
820 S7**).

821

### 822 **Single nucleus RNA-seq, library preparation, sequencing**

823 *10x RNA-seq*. Unsorted single-nucleus suspensions from frozen marmoset and mouse samples were  
824 generated as in (87). GEM generation and library preparation followed the manufacturer's protocol (10X  
825 Chromium single-cell 3' v.3, protocol version #CG000183\_ChromiumSingleCell3'\_v3\_UG\_Rev-A).  
826 Raw sequencing reads were aligned to the NCBI CJ1700 reference (marmoset) or GRCm38 (mouse).  
827 Reads that mapped to exons or introns were assigned to annotated genes. Libraries were sequenced to a  
828 median read depth of 8 reads per Unique Molecular Identifier (UMI, or transcript), obtaining a median  
829 7,262 UMIs per cell.

830

### 831 **RNA sequencing data processing, curation, clustering**

832 Processing and alignment steps follow those outlined in: <https://github.com/broadinstitute/Drop-seq/>  
833 (**Table S7**). Raw BCL files were processed using IlluminaBasecallsToSam, and reads with a barcode  
834 quality score below Q10 were discarded. Cell barcodes (CBCs) were filtered using the 10X CBC  
835 whitelist, followed by TSO and polyA trimming. Reads were aligned using STAR, and tagged with their  
836 gene mapping (exonic, intronic, or UTR) and function (strand). The reads were then processed through  
837 GATK BQSR, and tabulated in a digital gene expression matrix (DGE) containing all CBCs with at least  
838 20 transcripts aligning to coding, UTR, or intronic regions. Cell selection was performed based on  
839 CellBender remove-background non-empties (88), % intronic (% of a CBC's reads that are intronic), and  
840 number of UMIs for a CBC. A new filtered DGE containing only these selected CBCs was then  
841 generated. Finally, a gene-metagene DGE was created by merging the selected CBCs DGE with a  
842 metagene DGE (made by identifying reads from the selected CBCs that have a secondary alignment  
843 mapping to a different gene than its primary alignment).

844

845 Cell type classification models were trained using our annotations and scPred R package version 1.9.2  
846 (21). Detection of cell-cell doublets was performed using a two-step process based on the R package  
847 DoubletFinder (89). DoubletFinder implements a nearest-neighbors approach to doublet detection. First,  
848 artificial doublets are simulated from input single-cell data and are co-clustered with true libraries. True  
849 doublet libraries are identified by their relative fraction of artificial doublet nearest-neighbors in gene  
850 expression space. In our workflow this process is run twice, once with high stringency to identify and  
851 remove clear doublets, and again with a lower threshold to identify remaining, subtler doublet libraries.  
852 We used the following parameters for round 1: PN = 0.4, PK = 10 ^ seq(-4, -1, length.out=50),

853 NUM\_PCS = 5. For the second round: PN = 0.45, NUM\_PCS = 10, PK = 10 ^ seq(-4, -1, length.out=50).  
854 Because doublet libraries are initially categorized as true libraries in the nearest-neighbor search, we find  
855 this two-step process improves the sensitivity and accuracy of doublet detection.

856  
857 Clustering was performed using independent component analysis (ICA; R package fastICA)  
858 dimensionality reduction followed by Louvain. Cells assigned to one of the major glial types  
859 (oligodendrocyte lineage, astrocytes, vascular/endothelia, microglia/macrophages) by scPred were  
860 collected across all brain regions and clustered together. Neurons from most telencephalic structures  
861 (neocortex, hippocampus, striatum, amygdala) confidently assigned to the categories “GABAergic” and  
862 “glutamatergic” and so were clustered separately by neurotransmitter usage for each brain structure.  
863 Striatal neuron categories were “SPN” and “GABAergic interneuron”. Neurons in non-telencephalic brain  
864 structures were clustered separately by brain structure. All clusterings were performed in two stages: first-  
865 round clustering was based on the top 60 independent components (ICs) and a default resolution (res) of  
866 0.1, nearest neighbors (nn) = 25. Following the process outlined in(6), each was manually reviewed for  
867 skew and kurtosis of gene loadings on factors and cells to identify ICs that loaded on outliers, doublets, or  
868 artifactual signals. These were discarded and reclustering was performed on the remaining ICs. Each  
869 resulting cluster was then subjected to second-round clustering, during which ICs were again curated.  
870 Second-round clustering explored a range of parameters: nn=10,20,30;  
871 res=0.01,0.05,0.1,0.2,0.3,0.4,0.5,1.0. Final parameter values were chosen to optimize concordance, when  
872 possible, between the final number of clusters and the number of included ICs, such that each cluster was  
873 defined by one primary IC. Metacells for each cluster are generated by summing transcript counts for  
874 each cell across all cells in the cluster, normalizing by total number of transcripts, and scaling to counts  
875 per 100,000.

876

### 877 **Identification of regionally differentially expressed genes (rDEGs)**

878 We computed rDEGs for neocortical glutamatergic neurons, GABAergic neurons, astrocytes, and  
879 oligodendrocyte lineage types. We used individual cell level cluster assignments from the initial  
880 neocortical clustering (which contained all regions together) to create per-region metacells for each  
881 cluster. Normalized metacells were log10 transformed and pairwise differences across regions within the  
882 same cluster (cell type) were examined. Genes with > 3 fold difference in the same cluster between two  
883 regions were considered rDEGs. For this analysis we omitted from comparisons any region-cluster  
884 metacell generated from fewer than 50 cells, but retain comparisons between regions that had > 50 cells  
885 in that cluster. Genes that were consistently rDEGs in at least 3 individuals for each cluster-region pair are  
886 reported in **Table S3**.

887

### 888 **Ancestral State Reconstruction**

889 Ancestral state reconstruction (ASR) is a method to infer hidden ancestral traits from extant observations.  
890 For example, given a phylogenetic tree of species and genomic sequences thought to be homologous  
891 across those species, the reconstruction takes into account branch lengths to reconstruct the most likely  
892 ancestral sequence. We applied a maximum likelihood-based ASR approach (R package: fastAnc) to the  
893 scaled, normalized metacells of cell types and the dendrogram of their similarity to produce estimates of  
894 expression of each gene at the internal nodes of the tree. This enabled comparisons of leaf nodes to  
895 internal nodes as well as internal nodes to each other. For example, compared to the parent node of

896 amygdala, basal forebrain, and hypothalamic SPN-like GABAergic projection neurons, the reconstructed  
897 parent node of striatal SPNs had higher expression of known markers of striatal projection neurons such  
898 as *DACHI*. We used these reconstructions of internal node gene expression to compare major clades of  
899 the tree, and used a Chi-square test to determine whether transcription factors were overrepresented  
900 among differentially expressed genes (threshold: 3-fold difference) between pairs of internal nodes.

901

### 902 **Spatial smFISH experiments**

903 All probes are listed in **Table S4**. All smFISH validation experiments were carried out on distinct  
904 biological replicates from those used for snRNA-seq or single-cell ATAC-seq experiments.

905

906 *smFISH tissue processing and quantification*. Two marmosets (Cj 18-134 and 19-212) were euthanized  
907 and perfused with PBS (**Table S1**). The brain was removed, embedded rapidly in OCT, and stored in the -  
908 80C freezer. Tissue was then cut to 16 $\mu$ m on a cryostat and stored in the -80C until needed. *In situ*  
909 hybridization was performed for genes of interest (see **Table S4**) with HCR or ACD antisense probes,  
910 incubated with TrueBlack Lipofuscin Autofluorescence Quencher (Biotium, 23007) for 10 seconds at  
911 room temperature to eliminate confounding lipofuscin autofluorescence present in the tissue. Samples  
912 were then coverslipped with ProLong Diamond Antifade Mountant (Invitrogen, P36970). Z-stack serial  
913 images were taken through the whole depth across striatum, hypothalamus and basal forebrain regions,  
914 and several regions of neocortex, on the TissueGnostic TissueFAXS SL slide-scanning, spinning disk  
915 confocal microscope (Hamamatsu Orca Flash 4.0 v3) using a 20 $\times$ /0.8 NA air objective for ACD stains or  
916 a 40 $\times$ /1.2 NA water-immersion objective for HCR stains.

917

918 Series images were segmented using StrataQuest, a software package from TissueGnostics, which enables  
919 the quantification of signals within segmented images (similar to CellProfiler). Nuclei objects were  
920 generated using the DAPI channel, and artifacts were removed based on size and intensity. Exclusion  
921 ROIs were manually drawn to avoid areas of white matter, large artifacts, and autofluorescence before  
922 computing intensity and other statistical and morphological measurements (20 parameters) for each  
923 channel. Specifically, 50 cells were hand-labeled as positive or negative for the markers of interest in  
924 order to identify the appropriate threshold for feature selection using the parameters that best  
925 discriminated this binary. Parameters included mean intensity, maximum intensity, standard deviation of  
926 intensity, and range of intensity, and equivalent diameter. These filters were then applied to the unlabeled  
927 data to identify positive cells.

928

929 Segmented cells were further analyzed using in-house code ([https://github.com/klevando/BICCN-](https://github.com/klevando/BICCN-StrataQuest-Script)  
930 [StrataQuest-Script](https://github.com/klevando/BICCN-StrataQuest-Script), **Table S7**). Spatial locations of the cells were visualized by plotting the x-y  
931 coordinates associated with each nuclei. These were then binned into 2-D histograms across the x and y  
932 axis (corresponding to the rostrocaudal plane and to the dorsoventral plane respectively). A size of 100  
933 bins was chosen for the first (medial-most) slice of a series across the x axis and the calculated bin size  
934 was then used across the y axis of the first slice and across other slices in the series. Positive events for a  
935 gene in a given bin were either normalized to the number of detected nuclei in that bin (DAPI) and plotted  
936 in 2-D as a relative heatmap, or simply plotted as a density heatmap without being normalized to DAPI.  
937 Whole slice normalizations across the mediolateral axis (all positive events for a gene in a given slice  
938 relative to DAPI) were plotted as bar graphs. DAPI and marker of interest counts are available in **Data**  
939 **S1-S2**.

940

### 941 **Neocortical Areal Proportions**

942 In addition to the mediolateral subdivisions of marmoset neocortex, we further parcellated the neocortex  
943 into subregions referencing the Brain/MINDS 3D Digital Marmoset Atlas  
944 (<https://doi.org/10.24475/bma.4520>). Slice selection was based upon visual recognition of prominent  
945 landmarks (white matter, striatal boundary as well as DAPI nuclei staining) within our tissue and matched  
946 with the nearest atlas slice. ROIs for each parcellated region were created using the StrataQuest software  
947 in the anterior-posterior and dorsal-ventral axes (**Fig. S8C**). The corresponding feature selection that was  
948 previously set within the full neocortical sections was carried across gene and slice. The parameters used  
949 were mean intensity, maximum intensity, standard deviation of intensity, and range of intensity, and  
950 equivalent diameter. These filters were then applied to the unlabeled data to identify positive cells within  
951 each individual ROI. The parcellated neocortical areas were then analyzed using in-house code  
952 (<https://github.com/klevando/BICCN-StrataQuest-Script>, **Table S7**). As above, positive events for a gene  
953 in a given ROI were normalized to DAPI and plotted in a (stacked) bar graph. Relative percentages  
954 between genes were calculated and plotted stacked.

### 955 **Morphology and smFISH experiments**

956 AAV9-hDlx5/6-GFP-fGFP virus was generated as in (19). Virus was systemically IV injected (400ul-  
957 700ul at 1.7- 2.4<sup>10</sup> titer) in 5 marmosets. The virus was allowed to incubate for approximately 2 months.  
958 After systemic IV injection with AAV9-hDlx5/6-GFP-fGFP, marmosets were euthanized and perfused  
959 with saline followed by 4% paraformaldehyde (PFA). Brains were removed and 120µm sections were cut  
960 on a vibratome into PBS-Azide and stored at 4C or moved into 70% ethanol for storage at -20C. 70%  
961 ethanol storage prevents RNA degradation at this temperature without significant tissue shrinkage for  
962 short storage times. Due to lab shutdowns during the pandemic, sections from two marmosets were stored  
963 in 70% ethanol for approximately 4 months. These samples exhibited significant shrinkage, measured by  
964 DAPI-stained nuclei diameters (**Table S1**), therefore we only compared morphology parameters within-  
965 donor. Sections were taken as needed and *in situ* hybridization was performed with HCR antisense  
966 probes, following the generic sample in solution HCR protocol with a 2-fold increase in concentration of  
967 probe to hybridization buffer (Molecular Instruments, [https://files.molecularinstruments.com/MI-  
968 Protocol-RNAFISH-GenericSolution-Rev8.pdf](https://files.molecularinstruments.com/MI-Protocol-RNAFISH-GenericSolution-Rev8.pdf)), for markers of interest (**Table S4**) that corresponded  
969 with RNA-seq defined clusters. The sections were then stained with anti-GFP antibody (**Table S4**) and a  
970 secondary antibody (**Table S4**) to amplify the endogenous GFP signal  
971 (<https://www.protocols.io/view/marmoset-nhp-free-floating-anti-gfp-antibody-stain-3by147nb2lo5/v1>,  
972 **Table S4**). Sections were incubated in TrueBlack (Biotium, 23007) for 3-5 minutes in order to mask  
973 confounding lipofuscin autofluorescence throughout the section. Sections were then mounted onto a slide  
974 and coverslipped with ProLong Diamond Antifade Mountant (Invitrogen, P36970) for imaging.

975

976 *Imaging for morphology.* Sections prepared for morphology were imaged on a Nikon Ti Eclipse inverted  
977 microscope with an Andor CSU-W1 confocal spinning disc unit and Andor DU-888 EMCCD using a  
978 40×/1.15 NA water-immersion objective, and later on a TissueGnostic TissueFAXS SL slide-scanning,  
979 spinning disk confocal microscope (with Hamamatsu Orca Flash 4.0 v3) using a 40×/1.2 NA water-  
980 immersion objective. With the TissueFAXS, overview images were taken in order to select GFP+ cells  
981 for imaging at 40× and to highlight the exact location of the cell. GFP+ cells were imaged for stained  
982 markers of interest. Selected sections were imaged on an upright confocal laser scanning microscope



983 (Olympus Fluoview FV3000) using a 40x/0.95 NA air objective or a 60x/1.50 NA oil-immersion  
984 objective and cooled GaAsP PMTs.

985 *Morphological reconstruction and feature quantification - Imaris.* Without pre-processing the confocal  
986 images, three-dimensional (3D) reconstruction and surface rendering of striatal and neocortical  
987 interneurons were performed using Imarisx64 9.9 software (Oxford Instruments) based on GFP+ signal.  
988 Surface-rendered images were used to determine the soma diameter, total volume, and total surface area  
989 for each z-stack image. 3D-skeleton diagrams (**Figs. 5A-C** and **6H**), corresponding to each surface-  
990 rendered image (data not shown), were generated using the Filament Tracing wizard in Imaris and then  
991 pseudo-colored in Adobe Illustrator. The total number of primary dendritic branches, dendritic branch  
992 points, area, volume, and length of the 3D-skeleton diagrams were calculated using the AutoPath (no  
993 loops) algorithm in the filament tracing wizard in Imaris. The total number of primary dendritic branches  
994 for each cell is defined by the number of dendrite branches in the filament trace 1 distance value away  
995 from the soma. The distance value is calculated automatically by the AutoPath (no loops) algorithm based  
996 on the diameter of the soma and the diameter of the thinnest cellular process. All data were exported to  
997 CSV, and data collected from exemplar cells (**Fig. 5A-B** and **6G**) were reported in **Table S6**.

998 A separate dataset containing GFP+ interneurons from one animal (Cj 17-154) was first blinded using a  
999 custom Python script, then reconstructed with Imaris (**Figs. 5C-D**). All results are presented as mean  $\pm$   
1000 SEM. Comparisons between soma diameter, surface area, surface volume, and the number of primary  
1001 branches were carried out using unpaired *t*-tests. Unpaired Mann-Whitney *U* tests were used to  
1002 statistically compare the total length, area, volume, and total number of dendritic branch points  
1003 measurements. Statistically significant analyses were denoted as follows: \**p* < 0.05; \*\**p* < 0.01.

1004  
1005 *Morphological reconstruction and feature quantification - NeuTube.* Automatic or semi-automatic tracing  
1006 algorithms are challenged by some data, perhaps due to the low SNR of a given image. To overcome this,  
1007 we manually reconstructed the sparse neurons via Neutube (90) tracing software. With the software, we  
1008 1) Create 3D volume rendering of the GFP-AAV marmoset neuron, 2) use the signal transfer function  
1009 (e.g., histogram equalization) for overall intensity and opacity values to optimize the signal-to-noise ratio  
1010 by manually examining the clearest visualization of the dendrites, 3) Build the neuron skeleton over the  
1011 3D volume by tracing the processes, 4) Scan through the 3D volume to make sure no parts of the neuron  
1012 are missed, 5) Double check the raw 2D images to see if any of the branches were not presented well in  
1013 3D due to volume rendering artifacts, 6) Label axon, dendrites and soma parts of the skeleton model.  
1014 Reconstructed neurons were saved as SWC format.

### 1015 1016 **Single nucleus ATAC-seq, library preparation, sequencing**

1017 Single nucleus ATAC-seq (snATAC-seq; 10x Genomics Single Cell ATAC v1) was conducted on fresh  
1018 marmoset tissue (1 female, 1.5 y.o.) dissected from anterior striatum. Nuclei suspensions were generated  
1019 following the 10x recommended protocol (CG000212 Rev B). Library preparation followed 10x  
1020 Genomics Single Cell ATAC v1 Guide (CG000168 Rev D). Library was sequenced on an Illumina  
1021 NovaSeq (RRID:SCR\_016387) using 100 bp paired-end reads to a median per-cell fragment depth of  
1022 25,472. Alignment and fragment counting was conducted using Cell Ranger (RRID:SCR\_01734), aligned  
1023 to marmoset genome cj1700 ([https://www.ncbi.nlm.nih.gov/assembly/GCF\\_009663435.1/](https://www.ncbi.nlm.nih.gov/assembly/GCF_009663435.1/);  
1024 GCA\_009663445.2). snATAC-seq data were integrated with marmoset striatal snRNA-seq data from two  
1025 independent animals (bi005, bi006) using Signac (RRID:SCR\_021158) with the following parameters:  
1026 integration method: cca; weight.reduction = lsi. Differentially accessible peaks for each cluster were

1027 calculated with a 3-fold change cutoff and the minimum fraction of expressed cells (in target cluster) =  
1028 0.2. Enhancer locations were as follows (CJ1700 coordinates): Eh14 = chr1-122696345-122696560 (215  
1029 bp); Eh15 = chr17-32919427-32919564 (137 bp); Eh16 = chr20-38770509-38770619 (110 bp); Eh17 =  
1030 chr9-60258694-60258788 (94 bp).

1031

### 1032 **TAC3-AAV viral design and production.**

1033 AAVs were produced in accordance with the protocol (91). 5.7 µg/150 mm dish of construct DNA was  
1034 transfected with 22.8 µg/150 mm dish of pAAV9 capsid plasmid and 11.45 µg/150 mm dish of  
1035 pAdDeltaF6 helper plasmid using polyethylenimine 25K MW (Polysciences, 23966-1). Collection of  
1036 cells and media for AAV harvesting began 72 hours following transfection before iodixanol gradient  
1037 ultracentrifugation purification using a Type 70 Ti Fixed-Angle Titanium Rotor (Beckman-Coulter,  
1038 337922). Titer was calculated using digital droplet PCR (ddPCR) according to the protocol “[ddPCR  
1039 Titration of AAV Vectors](https://www.addgene.org/protocols/aav-ddpcr-titration/)” (<https://www.addgene.org/protocols/aav-ddpcr-titration/>) using the QX200  
1040 AutoDG Droplet Digital PCR System (BioRad, 1864100). gBlock fragments containing the tandem *TAC3*  
1041 enhancers (E14E15E16E17) were synthesized by Integrated DNA Technologies (IDT). The enhancers  
1042 were cloned into AAV plasmid vector backbones containing a minimal CMV promoter, the reporter and a  
1043 barcode unique to each enhancer sequence using the NEBuilder® HiFi DNA Assembly Cloning Kit  
1044 (NEB-E5520S), following standard protocol. 2 µL of Gibson assembly product was used to transform 50  
1045 µL of home-made Stb13 cells following a standard transformation protocol. Mini-preparation of plasmids  
1046 was carried out using the NucleoSpin mini kit (Macherey-Nagel). Positive clones were identified by  
1047 restriction enzyme digestion and sequencing. The positive clones were grown in 300 mL LB cultures and  
1048 the plasmids were extracted using the NucleoBond Xtra Midi EF kit (Macherey-Nagel). The plasmids  
1049 were sent out for sequencing again before being packaged into AAVs.

### 1050 **TAC3-AAV local injection procedure**

1051 *Structural MRI Scanning.* In preparation for MR imaging under anesthesia, an animal (2 marmosets, Cj  
1052 19-207 and 17-B111, **Table S1**) checked for robust health was fasted overnight with *ad libitum* access to  
1053 water. Prior to scanning, the animal was sedated with Alphaxalone (5-10 mg/kg) or a combination of  
1054 Alphaxalone (4-8 mg/kg) and Ketamine (5-10 mg/Kg) given intramuscularly. It was then transferred to a  
1055 custom designed MRI cradle equipped with a 3D printed nose cone for delivering anesthetic gases. The  
1056 animal’s head was securely held to minimize motion artifacts and stereotaxically align the rostral-caudal  
1057 axis with the MR scanner bore using contrast filled MR compatible ear bars, an adjustable palette bar and  
1058 eye bars. During scanning, anesthesia was maintained at 1-2% isoflurane in a mixture of oxygen. A  
1059 temperature controlled water circulating heat pad was used for thermal support. Heart rate and blood  
1060 oxygen saturation levels were continuously monitored and recorded every 10 min with an MR compatible  
1061 monitoring system (Nonin, MN). MR scans consisted of high-resolution 3D T1 mapping using a  
1062 Magnetization-Prepared Rapid Gradient-Echo (MPRAGE) sequence (Liu et al., 2011) with repetition  
1063 time (TR) = 6000 ms, TE (echo time) = 4.6 ms; flip angle (FA) = 12 degrees; FOV = 80, matrix size =  
1064 256x256. A high-resolution T2-weighted anatomical scan was also obtained using a RARE pulse  
1065 sequence with effective TE = 35.5 ms, TR = 2500 ms, RARE factor = 8, spatial resolution = 156 µm ×  
1066 156 µm × 0.5 mm, and matrix size = 256 × 256, RARE factor = 4, 80 mm FOV.

1067

1068 *Virus injection surgery.* Following sedation with Alphaxalone (5-10 mg/kg), the animal was intubated and  
1069 maintained at 1.5-2% isoflurane in a mixture of oxygen throughout the rest of the procedure. An

1070 intravenous (IV) catheter was placed in the saphenous vein for infusion of fluids and drugs during the  
1071 surgery and the recovery period. Heart rate, SpO<sub>2</sub>, ECG, end-tidal CO<sub>2</sub> and rectal temperature were  
1072 continuously monitored and logged every 5 minutes throughout. Once the animal acquired a stable plane  
1073 of anesthesia, it was placed in a stereotaxic apparatus (Narishige, Japan). A thin layer of sterile eye  
1074 lubricant was applied to protect against corneal drying. Animal was also provided with a single bolus  
1075 dose of intravenous dexamethasone (0.4 mg/kg) to guard against brain swelling. The scalp and fascia  
1076 were removed in layers via blunt dissection to expose the injection sites. Using MRI atlas guidance,  
1077 bilateral craniotomies were performed to expose the medial anterior caudate and ventral posterior  
1078 putamen region. The tandem enhancer virus AAV9-tandemE-TAC3-EGFP was injected in left Caudate  
1079 (high titer, 10<sup>13</sup> low volume, 0.5 ul) and left Putamen (low titer, 10<sup>11</sup>, high volume 1.5 ul). Each  
1080 injection was delivered with a controlled syringe pump (100 nL/minute). After each injection the needle  
1081 was kept in place for 10 minutes then slowly retracted over 1-2 minutes to minimize injection backflow.  
1082 Following withdrawal, the cranial openings were covered with bonewax, fascia and scalp were sutured in  
1083 layer wise manner with 3-0 vicryl sutures. The suture site was cleaned with warm sterile saline and  
1084 covered with hypafix. For recovery the animal was transferred in an incubator and monitored closely till it  
1085 was able to move effortlessly and accepted treats before returning to its home cage. Post-op medications  
1086 were provided under veterinary advice for pain and inflammation control until full recovery. The animals  
1087 were euthanized 6-10 weeks after viral injection and were perfused transcardially with 4% PFA. The  
1088 brain was extracted for histology, smFISH, and confocal microscopy.  
1089

#### 1090 **TAC3-AAV-BI103 systemic injection procedure**

1091 One 2-year old female marmoset (**Table S1**) was sedated with Alphaxalone (5-10 mg/kg) given  
1092 intramuscularly. A catheter was placed into the tail vein and 200 µl of purified viral particles were  
1093 injected at a dose of 7.85x10<sup>13</sup> vg/kg, followed by injection of 1.5 ml saline to flush the line. The animal  
1094 was euthanized 4 weeks after viral injection and was perfused transcardially with 4% PFA. The brain was  
1095 extracted for histology, smFISH, and confocal microscopy.

#### 1096 **TAC3-AAV histology**

1097 For AAV9-tandemE-TAC3-EGFP experiments, coronal sections around the injection sites were cut at  
1098 100 µm on a vibratome (Leica, VT1000S) and then stored in PBS-NaN<sub>3</sub> at 4 °C until use. For AAV-  
1099 BI103-tandemE-TAC3-EGFP experiments, coronal and sagittal sections were processed. Sections were  
1100 stained for *TAC3* (Molecular Instruments, PRC843, **Table S4**) using the HCR v.3.0 protocol (Molecular  
1101 Instruments) described above and a rabbit anti-GFP antibody (Invitrogen, A11122, **Table S4**) with  
1102 subsequent secondary goat anti-rabbit conjugated with AF488 (ThermoFisher, A-11008). Stained sections  
1103 were then incubated 1-3 minutes in TrueBlack to eliminate confounding lipofuscin autofluorescence. The  
1104 striatum was imaged for each section using the TissueFAXS SL with a 40×/1.2 NA water-immersion lens  
1105 through the whole thickness of the tissue.  
1106

#### 1107 **References**

1108 1. S. Ma, M. Skarica, Q. Li, C. Xu, R. D. Risgaard, A. T. N. Tebbenkamp, X. Mato-Blanco, R. Kovner,

- 1109 Ž. Krsnik, X. de Martin, V. Luria, X. Martí-Pérez, D. Liang, A. Karger, D. K. Schmidt, Z. Gomez-  
1110 Sanchez, C. Qi, K. T. Gobeske, S. Pochareddy, A. Debnath, C. J. Hottman, J. Spurrier, L. Teo, A. G.  
1111 Boghdadi, J. Homman-Ludiye, J. J. Ely, E. W. Daadi, D. Mi, M. Daadi, O. Marín, P. R. Hof, M.-R.  
1112 Rasin, J. Bourne, C. C. Sherwood, G. Santpere, M. J. Girgenti, S. M. Strittmatter, A. M. M. Sousa,  
1113 N. Sestan, Molecular and cellular evolution of the primate dorsolateral prefrontal cortex. *Science*,  
1114 eabo7257 (2022).
- 1115 2. T. E. Bakken, N. L. Jorstad, Q. Hu, B. B. Lake, W. Tian, B. E. Kalmbach, M. Crow, R. D. Hodge, F.  
1116 M. Krienen, S. A. Sorensen, J. Eggermont, Z. Yao, B. D. Aevermann, A. I. Aldridge, A. Bartlett, D.  
1117 Bertagnolli, T. Casper, R. G. Castanon, K. Crichton, T. L. Daigle, R. Dalley, N. Dee, N. Dembrow,  
1118 D. Diep, S.-L. Ding, W. Dong, R. Fang, S. Fischer, M. Goldman, J. Goldy, L. T. Graybuck, B. R.  
1119 Herb, X. Hou, J. Kancherla, M. Kroll, K. Lathia, B. van Lew, Y. E. Li, C. S. Liu, H. Liu, J. D.  
1120 Lucero, A. Mahurkar, D. McMillen, J. A. Miller, M. Moussa, J. R. Nery, P. R. Nicovich, S.-Y. Niu,  
1121 J. Orvis, J. K. Osteen, S. Owen, C. R. Palmer, T. Pham, N. Plongthongkum, O. Poirion, N. M. Reed,  
1122 C. Rimorin, A. Rivkin, W. J. Romanow, A. E. Sedeño-Cortés, K. Siletti, S. Somasundaram, J. Sulc,  
1123 M. Tieu, A. Torkelson, H. Tung, X. Wang, F. Xie, A. M. Yanny, R. Zhang, S. A. Ament, M. M.  
1124 Behrens, H. C. Bravo, J. Chun, A. Dobin, J. Gillis, R. Hertzano, P. R. Hof, T. Höllt, G. D. Horwitz,  
1125 C. D. Keene, P. V. Kharchenko, A. L. Ko, B. P. Lelieveldt, C. Luo, E. A. Mukamel, A. Pinto-Duarte,  
1126 S. Preissl, A. Regev, B. Ren, R. H. Scheuermann, K. Smith, W. J. Spain, O. R. White, C. Koch, M.  
1127 Hawrylycz, B. Tasic, E. Z. Macosko, S. A. McCarroll, J. T. Ting, H. Zeng, K. Zhang, G. Feng, J. R.  
1128 Ecker, S. Linnarsson, E. S. Lein, Comparative cellular analysis of motor cortex in human, marmoset  
1129 and mouse. *Nature*. **598**, 111–119 (2021).
- 1130 3. F. M. Krienen, M. Goldman, Q. Zhang, R. C. H. del Rosario, M. Florio, R. Machold, A. Saunders,  
1131 K. Levandowski, H. Zaniewski, B. Schuman, C. Wu, A. Lutservitz, C. D. Mullally, N. Reed, E.  
1132 Bien, L. Bortolin, M. Fernandez-Otero, J. D. Lin, A. Wysoker, J. Nemesh, D. Kulp, M. Burns, V.  
1133 Tkachev, R. Smith, C. A. Walsh, J. Dimidschstein, B. Rudy, L. S. Kean, S. Berretta, G. Fishell, G.  
1134 Feng, S. A. McCarroll, Innovations present in the primate interneuron repertoire. *Nature*. **586**, 262–  
1135 269 (2020).
- 1136 4. J.-P. Lin, H. M. Kelly, Y. Song, R. Kawaguchi, D. H. Geschwind, S. Jacobson, D. S. Reich,  
1137 Microenvironment Impacts the Molecular Architecture and Interactivity of Resident Cells in  
1138 Marmoset Brain. *bioRxiv* (2021), p. 2021.01.25.426385.
- 1139 5. R. C. Bandler, I. Vitali, R. N. Delgado, M. C. Ho, E. Dvoretzkova, J. S. Ibarra Molinas, P. W. Frazel,  
1140 M. Mohammadkhani, R. Machold, S. Maedler, S. A. Liddelow, T. J. Nowakowski, G. Fishell, C.  
1141 Mayer, Single-cell delineation of lineage and genetic identity in the mouse brain. *Nature*. **601**, 404–  
1142 409 (2022).
- 1143 6. A. Saunders, E. Z. Macosko, A. Wysoker, M. Goldman, F. M. Krienen, H. de Rivera, E. Bien, M.  
1144 Baum, L. Bortolin, S. Wang, A. Goeva, J. Nemesh, N. Kamitaki, S. Brumbaugh, D. Kulp, S. A.  
1145 McCarroll, Molecular Diversity and Specializations among the Cells of the Adult Mouse Brain. *Cell*.  
1146 **174**, 1015–1030.e16 (2018).
- 1147 7. A. Zeisel, H. Hochgerner, P. Lönnerberg, A. Johnsson, F. Memic, J. van der Zwan, M. Häring, E.  
1148 Braun, L. E. Borm, G. La Manno, S. Codeluppi, A. Furlan, K. Lee, N. Skene, K. D. Harris, J.  
1149 Hjerling-Leffler, E. Arenas, P. Ernfors, U. Marklund, S. Linnarsson, Molecular Architecture of the  
1150 Mouse Nervous System. *Cell*. **174**, 999–1014.e22 (2018).
- 1151 8. Z. Yao, C. T. J. van Velthoven, M. Kunst, M. Zhang, D. McMillen, C. Lee, W. Jung, J. Goldy, A.  
1152 Abdelhak, P. Baker, E. Barkan, D. Bertagnolli, J. Campos, D. Carey, T. Casper, A. B. Chakka, R.  
1153 Chakrabarty, S. Chavan, M. Chen, M. Clark, J. Close, K. Crichton, S. Daniel, T. Dolbeare, L.



- 1154 Ellingwood, J. Gee, A. Glandon, J. Gloe, J. Gould, J. Gray, N. Guilford, J. Guzman, D. Hirschstein,  
1155 W. Ho, K. Jin, M. Kroll, K. Lathia, A. Leon, B. Long, Z. Maltzer, N. Martin, R. McCue, E.  
1156 Meyerdierks, T. N. Nguyen, T. Pham, C. Rimorin, A. Ruiz, N. Shapovalova, C. Slaughterbeck, J.  
1157 Sulc, M. Tieu, A. Torkelson, H. Tung, N. V. Cuevas, K. Wadhvani, K. Ward, B. Levi, C. Farrell, C.  
1158 L. Thompson, S. Mufti, C. M. Pagan, L. Kruse, N. Dee, S. M. Sunkin, L. Esposito, M. J. Hawrylycz,  
1159 J. Waters, L. Ng, K. A. Smith, B. Tasic, X. Zhuang, H. Zeng, A high-resolution transcriptomic and  
1160 spatial atlas of cell types in the whole mouse brain. *bioRxiv* (2023), p. 2023.03.06.531121.
- 1161 9. J. Langlieb, N. Sachdev, K. Balderrama, N. Nadaf, M. Raj, E. Murray, J. Webber, C. Vanderburg, V.  
1162 Gazestani, D. Tward, C. Mezas, X. Li, D. Cable, T. Norton, P. P. Mitra, F. Chen, E. Macosko, The  
1163 cell type composition of the adult mouse brain revealed by single cell and spatial genomics. *bioRxiv*  
1164 (2023), doi:10.1101/2023.03.06.531307.
- 1165 10. K. L. Chiou, X. Huang, M. O. Bohlen, S. Tremblay, D. R. O’Day, C. H. Spurrell, A. A. Gogate, T.  
1166 M. Zintel, Cayo Biobank Research Unit, M. G. Andrews, M. I. Martinez, L. M. Starita, M. J.  
1167 Montague, M. L. Platt, J. Shendure, N. Snyder-Mackler, A single-cell multi-omic atlas spanning the  
1168 adult rhesus macaque brain. *bioRxiv* (2022), p. 2022.09.30.510346.
- 1169 11. K. Siletti, R. Hodge, A. M. Albiach, L. Hu, K. W. Lee, P. Lönnerberg, T. Bakken, S.-L. Ding, M.  
1170 Clark, T. Casper, N. Dee, J. Gloe, C. Dirk Keene, J. Nyhus, H. Tung, A. M. Yanny, E. Arenas, E. S.  
1171 Lein, S. Linnarsson, Transcriptomic diversity of cell types across the adult human brain. *bioRxiv*  
1172 (2022), p. 2022.10.12.511898.
- 1173 12. J.-P. Lin, H. M. Kelly, Y. Song, R. Kawaguchi, D. H. Geschwind, S. Jacobson, D. S. Reich,  
1174 Transcriptomic architecture of nuclei in the marmoset CNS. *Nat. Commun.* **13**, 5531 (2022).
- 1175 13. R. D. Hodge, T. E. Bakken, J. A. Miller, K. A. Smith, E. R. Barkan, L. T. Graybuck, J. L. Close, B.  
1176 Long, N. Johansen, O. Penn, Z. Yao, J. Eggermont, T. Holtt, B. P. Levi, S. I. Shehata, B.  
1177 Aevermann, A. Beller, D. Bertagnolli, K. Brouner, T. Casper, C. Cobbs, R. Dalley, N. Dee, S.-L.  
1178 Ding, R. G. Ellenbogen, O. Fong, E. Garren, J. Goldy, R. P. Gwinn, D. Hirschstein, C. D. Keene, M.  
1179 Keshk, A. L. Ko, K. Lathia, A. Mahfouz, Z. Maltzer, M. McGraw, T. N. Nguyen, J. Nyhus, J. G.  
1180 Ojemann, A. Oldre, S. Parry, S. Reynolds, C. Rimorin, N. V. Shapovalova, S. Somasundaram, A.  
1181 Szafer, E. R. Thomsen, M. Tieu, G. Quon, R. H. Scheuermann, R. Yuste, S. M. Sunkin, B.  
1182 Lelieveldt, D. Feng, L. Ng, A. Bernard, M. Hawrylycz, J. W. Phillips, B. Tasic, H. Zeng, A. R.  
1183 Jones, C. Koch, E. S. Lein, Conserved cell types with divergent features in human versus mouse  
1184 cortex. *Nature*. **573**, 1–38 (2019).
- 1185 14. S. Sahara, Y. Yanagawa, D. D. M. O’Leary, C. F. Stevens, The Fraction of Cortical GABAergic  
1186 Neurons Is Constant from Near the Start of Cortical Neurogenesis to Adulthood. *Journal of*  
1187 *Neuroscience*. **32**, 4755–4761 (2012).
- 1188 15. Y. Kim, G. R. Yang, K. Pradhan, K. U. Venkataraju, M. Bota, L. C. G. del Molino, G. Fitzgerald, K.  
1189 Ram, M. He, J. M. Levine, P. Mitra, Z. J. Huang, X.-J. Wang, P. Osten, Brain-wide Maps Reveal  
1190 Stereotyped Cell-Type- Based Cortical Architecture and Subcortical Sexual Dimorphism. *Cell*. **171**,  
1191 456–460.e22 (2017).
- 1192 16. J. Hill, T. Inder, J. Neil, D. Dierker, J. Harwell, D. Van Essen, Similar patterns of cortical expansion  
1193 during human development and evolution. *Proceedings of the National Academy of Sciences*. **107**,  
1194 13135–13140 (2010).
- 1195 17. D. Goertsen, N. C. Flytzanis, N. Goeden, M. R. Chuapoco, A. Cummins, Y. Chen, Y. Fan, Q. Zhang,  
1196 J. Sharma, Y. Duan, L. Wang, G. Feng, Y. Chen, N. Y. Ip, J. Pickel, V. Gradinaru, AAV capsid



- 1197 variants with brain-wide transgene expression and decreased liver targeting after intravenous  
1198 delivery in mouse and marmoset. *Nat. Neurosci.* **25**, 106–115 (2022).
- 1199 18. J. K. Mich, L. T. Graybuck, E. E. Hess, J. T. Mahoney, Y. Kojima, Y. Ding, S. Somasundaram, J. A.  
1200 Miller, B. E. Kalmbach, C. Radaelli, B. B. Gore, N. Weed, V. Omstead, Y. Bishaw, N. V.  
1201 Shapovalova, R. A. Martinez, O. Fong, S. Yao, M. Mortrud, P. Chong, L. Loftus, D. Bertagnolli, J.  
1202 Goldy, T. Casper, N. Dee, X. Opitz-Araya, A. Cetin, K. A. Smith, R. P. Gwinn, C. Cobbs, A. L. Ko,  
1203 J. G. Ojemann, C. D. Keene, D. L. Silbergeld, S. M. Sunkin, V. Gradinaru, G. D. Horwitz, H. Zeng,  
1204 B. Tasic, E. S. Lein, J. T. Ting, B. P. Levi, Functional enhancer elements drive subclass- selective  
1205 expression from mouse to primate neocortex. *Cell Rep.* **34**, 108754 (2021).
- 1206 19. J. Dimidschstein, Q. Chen, R. Tremblay, S. L. Rogers, G.-A. Saldi, L. Guo, Q. Xu, R. Liu, C. Lu, J.  
1207 Chu, J. S. Grimley, A.-R. Krostag, A. Kaykas, M. C. Avery, M. S. Rashid, M. Baek, A. L. Jacob, G.  
1208 B. Smith, D. E. Wilson, G. Kosche, I. Kruglikov, T. Rusielewicz, V. C. Kotak, T. M. Mowery, S. A.  
1209 Anderson, E. M. Callaway, J. S. Dasen, D. Fitzpatrick, V. Fossati, M. A. Long, S. Noggle, J. H.  
1210 Reynolds, D. H. Sanes, B. Rudy, G. Feng, G. Fishell, A viral strategy for targeting and manipulating  
1211 interneurons across vertebrate species. *Nat. Neurosci.* **19**, 1743–1749 (2016).
- 1212 20. D. Vormstein-Schneider, J. D. Lin, K. A. Pelkey, R. Chittajallu, B. Guo, M. A. Arias-Garcia, K.  
1213 Allaway, S. Sakopoulos, G. Schneider, O. Stevenson, J. Vergara, J. Sharma, Q. Zhang, T. P.  
1214 Franken, J. Smith, L. A. Ibrahim, K. J. M. Astro, E. Sabri, S. Huang, E. Favuzzi, T. Burbridge, Q.  
1215 Xu, L. Guo, I. Vogel, V. Sanchez, G. A. Saldi, B. L. Gorissen, X. Yuan, K. A. Zaghoul, O.  
1216 Devinsky, B. L. Sabatini, R. Batista-Brito, J. Reynolds, G. Feng, Z. Fu, C. J. McBain, G. Fishell, J.  
1217 Dimidschstein, Viral manipulation of functionally distinct interneurons in mice, non-human primates  
1218 and humans. *Nat. Neurosci.* **23**, 1–21 (2020).
- 1219 21. J. Alquicira-Hernandez, A. Sathe, H. P. Ji, Q. Nguyen, J. E. Powell, scPred: accurate supervised  
1220 method for cell-type classification from single-cell RNA-seq data. *Genome Biol.* **20**, 264 (2019).
- 1221 22. H. Zeng, J. R. Sanes, Neuronal cell-type classification: challenges, opportunities and the path  
1222 forward. *Nat. Rev. Neurosci.* **18**, 530–546 (2017).
- 1223 23. D. Arendt, J. M. Musser, C. V. H. Baker, A. Bergman, C. Cepko, D. H. Erwin, M. Pavlicev, G.  
1224 Schlosser, S. Widder, M. D. Laubichler, G. P. Wagner, The origin and evolution of cell types. *Nat.*  
1225 *Rev. Genet.* **17**, 744–757 (2016).
- 1226 24. H. Zeng, What is a cell type and how to define it? *Cell* (2022) (available at  
1227 <https://www.sciencedirect.com/science/article/pii/S0092867422007838>).
- 1228 25. L. J. Revell, phytools: an R package for phylogenetic comparative biology (and other things).  
1229 *Methods in Ecology and Evolution.* **3**, 217–223 (2012).
- 1230 26. J. Woych, A. Ortega Gurrola, A. Deryckere, E. C. B. Jaeger, E. Gumnit, G. Merello, J. Gu, A. Joven  
1231 Araus, N. D. Leigh, M. Yun, A. Simon, M. A. Tosches, Cell-type profiling in salamanders identifies  
1232 innovations in vertebrate forebrain evolution. *Science.* **377**, eabp9186 (2022).
- 1233 27. G. Meyer, Building a human cortex: the evolutionary differentiation of Cajal-Retzius cells and the  
1234 cortical hem. *J. Anat.* **217**, 334–343 (2010).
- 1235 28. P. Jager, G. Moore, P. Calpin, X. Durmishi, I. Salgarella, L. Menage, Y. Kita, Y. Wang, D. W. Kim,  
1236 S. Blackshaw, S. R. Schultz, S. Brickley, T. Shimogori, A. Delogu, Dual midbrain and forebrain  
1237 origins of thalamic inhibitory interneurons. *Elife.* **10** (2021), doi:10.7554/eLife.59272.

- 1238 29. K. Letinic, P. Rakic, Telencephalic origin of human thalamic GABAergic neurons. *Nat. Neurosci.* **4**,  
1239 931–936 (2001).
- 1240 30. L. W. Swanson, G. D. Petrovich, What is the amygdala? *Trends Neurosci.* **21**, 323–331 (1998).
- 1241 31. T. Hirata, P. Li, G. M. Lanuza, L. A. Cocas, M. M. Huntsman, J. G. Corbin, Identification of distinct  
1242 telencephalic progenitor pools for neuronal diversity in the amygdala. *Nat. Neurosci.* **12**, 141–149  
1243 (2009).
- 1244 32. T. Kaoru, F. C. Liu, M. Ishida, T. Oishi, M. Hayashi, M. Kitagawa, K. Shimoda, H. Takahashi,  
1245 Molecular characterization of the intercalated cell masses of the amygdala: implications for the  
1246 relationship with the striatum. *NSC.* **166**, 220–230 (2010).
- 1247 33. M. T. Schmitz, K. Sandoval, C. P. Chen, M. A. Mostajo-Radji, W. W. Seeley, T. J. Nowakowski, C.  
1248 J. Ye, M. F. Paredes, A. A. Pollen, The development and evolution of inhibitory neurons in primate  
1249 cerebrum. *Nature.* **603**, 871–877 (2022).
- 1250 34. D. L. Kaufman, C. R. Houser, A. J. Tobin, Two forms of the gamma-aminobutyric acid synthetic  
1251 enzyme glutamate decarboxylase have distinct intraneuronal distributions and cofactor interactions.  
1252 *J. Neurochem.* **56**, 720–723 (1991).
- 1253 35. J. R. Moffitt, D. Bambah-Mukku, S. W. Eichhorn, E. Vaughn, K. Shekhar, J. D. Perez, N. D.  
1254 Rubinstein, J. Hao, A. Regev, C. Dulac, X. Zhuang, Molecular, spatial, and functional single-cell  
1255 profiling of the hypothalamic preoptic region. *Science.* **362**, eaau5324–80 (2018).
- 1256 36. B. Tasic, Z. Yao, L. T. Graybiel, K. A. Smith, T. N. Nguyen, D. Bertagnolli, J. Goldy, E. Garren,  
1257 M. N. Economo, S. Viswanathan, O. Penn, T. Bakken, V. Menon, J. Miller, O. Fong, K. E.  
1258 Hirokawa, K. Lathia, C. Rimorin, M. Tieu, R. Larsen, T. Casper, E. Barkan, M. Kroll, S. Parry, N.  
1259 V. Shapovalova, D. Hirschstein, J. Pendergraft, H. A. Sullivan, T. K. Kim, A. Szafer, N. Dee, P.  
1260 Groblewski, I. Wickersham, A. Cetin, J. A. Harris, B. P. Levi, S. M. Sunkin, L. Madisen, T. L.  
1261 Daigle, L. Looger, A. Bernard, J. Phillips, E. Lein, M. Hawrylycz, K. Svoboda, A. R. Jones, C.  
1262 Koch, H. Zeng, Shared and distinct transcriptomic cell types across neocortical areas. *Nature.* **563**,  
1263 1–41 (2018).
- 1264 37. P. Balaram, J. H. Kaas, Towards a unified scheme of cortical lamination for primary visual cortex  
1265 across primates: insights from NeuN and VGLUT2 immunoreactivity. *Front. Neuroanat.* **8**, 81  
1266 (2014).
- 1267 38. O. A. Bayraktar, L. C. Fuentealba, A. Alvarez-Buylla, D. H. Rowitch, Astrocyte development and  
1268 heterogeneity. *Cold Spring Harb. Perspect. Biol.* **7**, a020362 (2014).
- 1269 39. O. A. Bayraktar, T. Bartels, S. Holmqvist, V. Kleshchevnikov, A. Martirosyan, D. Polioudakis, L.  
1270 Ben Haim, A. M. H. Young, M. Y. Batiuk, K. Prakash, A. Brown, K. Roberts, M. F. Paredes, R.  
1271 Kawaguchi, J. H. Stockley, K. Sabeur, S. M. Chang, E. Huang, P. Hutchinson, E. M. Ullian, M.  
1272 Hemberg, G. Coppola, M. G. Holt, D. H. Geschwind, D. H. Rowitch, Astrocyte layers in the  
1273 mammalian cerebral cortex revealed by a single-cell in situ transcriptomic map. *Nat. Neurosci.* **23**,  
1274 500–509 (2020).
- 1275 40. M. Y. Batiuk, A. Martirosyan, J. Wahis, F. de Vin, C. Marneffe, C. Kusserow, J. Koeppe, J. F.  
1276 Viana, J. F. Oliveira, T. Voet, C. P. Ponting, T. G. Belgard, M. G. Holt, Identification of region-  
1277 specific astrocyte subtypes at single cell resolution. *Nat. Commun.* **11**, 1220 (2020).

- 1278 41. A. Kriegstein, A. Alvarez-Buylla, The glial nature of embryonic and adult neural stem cells. *Annu.*  
1279 *Rev. Neurosci.* **32**, 149–184 (2009).
- 1280 42. C. C. Harwell, L. C. Fuentealba, A. Gonzalez-Cerrillo, P. R. L. Parker, C. C. Gertz, E. Mazzola, M.  
1281 T. Garcia, A. Alvarez-Buylla, C. L. Cepko, A. R. Kriegstein, Wide Dispersion and Diversity of  
1282 Clonally Related Inhibitory Interneurons. *Neuron.* **87**, 999–1007 (2015).
- 1283 43. C. Mayer, C. Hafemeister, R. C. Bandler, R. Machold, R. B. Brito, X. Jaglin, K. Allaway, A. Butler,  
1284 G. Fishell, R. Satija, Developmental diversification of cortical inhibitory interneurons. *Nature.* **555**,  
1285 457–462 (2018).
- 1286 44. C. Neyt, M. Welch, A. Langston, J. Kohtz, G. Fishell, A short-range signal restricts cell movement  
1287 between telencephalic proliferative zones. *J. Neurosci.* **17**, 9194–9203 (1997).
- 1288 45. F. García-Moreno, M. Pedraza, L. G. Di Giovannantonio, M. Di Salvio, L. López-Mascaraque, A.  
1289 Simeone, J. A. De Carlos, A neuronal migratory pathway crossing from diencephalon to  
1290 telencephalon populates amygdala nuclei. *Nat. Neurosci.* **13**, 680–689 (2010).
- 1291 46. A. J. Granger, M. L. Wallace, B. L. Sabatini, ScienceDirect Multi-transmitter neurons in the  
1292 mammalian central nervous system. *Curr. Opin. Neurobiol.* **45**, 85–91 (2017).
- 1293 47. N. X. Tritsch, A. J. Granger, B. L. Sabatini, Mechanisms and functions of GABA co-release. *Nat.*  
1294 *Genet.* **17**, 139–145 (2016).
- 1295 48. M. Bupesh, I. Legaz, A. Abellán, L. Medina, Multiple telencephalic and extratelencephalic  
1296 embryonic domains contribute neurons to the medial extended amygdala. *J. Comp. Neurol.* **519**,  
1297 1505–1525 (2011).
- 1298 49. L. Zhang, V. S. Hernandez, C. R. Gerfen, S. Z. Jiang, L. Zavala, R. A. Barrio, L. E. Eiden,  
1299 Behavioral role of PACAP signaling reflects its selective distribution in glutamatergic and  
1300 GABAergic neuronal subpopulations. *Elife.* **10** (2021), doi:10.7554/eLife.61718.
- 1301 50. N. Bozadjieva-Kramer, R. A. Ross, D. Q. Johnson, H. Fenselau, D. L. Haggerty, B. Atwood, B.  
1302 Lowell, J. N. Flak, The Role of Mediobasal Hypothalamic PACAP in the Control of Body Weight  
1303 and Metabolism. *Endocrinology.* **162** (2021), doi:10.1210/endocr/bqab012.
- 1304 51. J.-H. Cho, K. Zushida, G. P. Shumyatsky, W. A. Carlezon Jr, E. G. Meloni, V. Y. Bolshakov,  
1305 Pituitary adenylate cyclase-activating polypeptide induces postsynaptically expressed potentiation in  
1306 the intra-amygdala circuit. *J. Neurosci.* **32**, 14165–14177 (2012).
- 1307 52. E. Y. Lee, L. C. Chan, H. Wang, J. Lieng, M. Hung, Y. Srinivasan, J. Wang, J. A. Waschek, A. L.  
1308 Ferguson, K.-F. Lee, N. Y. Yount, M. R. Yeaman, G. C. L. Wong, PACAP is a pathogen-inducible  
1309 resident antimicrobial neuropeptide affording rapid and contextual molecular host defense of the  
1310 brain. *Proc. Natl. Acad. Sci. U. S. A.* **118** (2021), doi:10.1073/pnas.1917623117.
- 1311 53. Y. Kita, H. Nishibe, Y. Wang, T. Hashikawa, S. S. Kikuchi, M. U. A. C. Yoshida, C. Yoshida, T.  
1312 Kawase, S. Ishii, H. Skibbe, T. Shimogori, Cellular-resolution gene expression profiling in the  
1313 neonatal marmoset brain reveals dynamic species- and region-specific differences. *Proc. Natl. Acad.*  
1314 *Sci. U. S. A.* **118** (2021), doi:10.1073/pnas.2020125118.
- 1315 54. T. Shimogori, A. Abe, Y. Go, T. Hashikawa, N. Kishi, S. S. Kikuchi, Y. Kita, K. Niimi, H. Nishibe,  
1316 M. Okuno, K. Saga, M. Sakurai, M. Sato, T. Serizawa, S. Suzuki, E. Takahashi, M. Tanaka, S.

- 1317 Tatsumoto, M. Toki, M. U, Y. Wang, K. J. Windak, H. Yamagishi, K. Yamashita, T. Yoda, A. C.  
1318 Yoshida, C. Yoshida, T. Yoshimoto, H. Okano, Digital gene atlas of neonate common marmoset  
1319 brain. *Neurosci. Res.* **128**, 1–13 (2018).
- 1320 55. D. P. Orquera, M. B. Tavella, F. S. J. de Souza, S. Nasif, M. J. Low, M. Rubinstein, The  
1321 Homeodomain Transcription Factor NKX2.1 Is Essential for the Early Specification of Melanocortin  
1322 Neuron Identity and Activates Pomc Expression in the Developing Hypothalamus. *J. Neurosci.* **39**,  
1323 4023–4035 (2019).
- 1324 56. R. Murcia-Ramón, V. Company, I. Juárez-Leal, A. Andreu-Cervera, F. Almagro-García, S.  
1325 Martínez, D. Echevarría, E. Puellas, Neuronal tangential migration from Nkx2.1-positive  
1326 hypothalamus. *Brain Struct. Funct.* **225**, 2857–2869 (2020).
- 1327 57. C. E. Collins, D. C. Airey, N. A. Young, D. B. Leitch, J. H. Kaas, Neuron densities vary across and  
1328 within cortical areas in primates. *Proc. Natl. Acad. Sci. U. S. A.* **107**, 15927–15932 (2010).
- 1329 58. B. Schuman, R. P. Machold, Y. Hashikawa, J. Fuzik, G. J. Fishell, B. Rudy, Four Unique  
1330 Interneuron Populations Reside in Neocortical Layer 1. *J. Neurosci.* **39**, 125–139 (2019).
- 1331 59. M. Valero, T. J. Viney, R. Machold, S. Mederos, I. Zutshi, B. Schuman, Y. Senzai, B. Rudy, G.  
1332 Buzsáki, Sleep down state-active ID2/Nkx2.1 interneurons in the neocortex. *Nat. Neurosci.* **24**, 401–  
1333 411 (2021).
- 1334 60. B. Zingg, H. Hintiryan, L. Gou, M. Y. Song, M. Bay, M. S. Bienkowski, N. N. Foster, S. Yamashita,  
1335 I. Bowman, A. W. Toga, H.-W. Dong, Neural networks of the mouse neocortex. *Cell.* **156**, 1096–  
1336 1111 (2014).
- 1337 61. H. B. M. Uylings, H. J. Groenewegen, B. Kolb, Do rats have a prefrontal cortex? *Behav. Brain Res.*  
1338 **146**, 3–17 (2003).
- 1339 62. R. L. Buckner, D. S. Margulies, Macroscale cortical organization and a default-like apex transmodal  
1340 network in the marmoset monkey. *Nat. Commun.* **10**, 1976 (2019).
- 1341 63. M. K. Lin, Y. S. Takahashi, B.-X. Huo, M. Hanada, J. Nagashima, J. Hata, A. S. Tolpygo, K. Ram,  
1342 B. C. Lee, M. I. Miller, M. G. Rosa, E. Sasaki, A. Iriki, H. Okano, P. Mitra, A high-throughput  
1343 neurohistological pipeline for brain-wide mesoscale connectivity mapping of the common marmoset.  
1344 *Elife.* **8** (2019), doi:10.7554/eLife.40042.
- 1345 64. P. Majka, S. Bai, S. Bakola, S. Bednarek, J. M. Chan, N. Jermakow, L. Passarelli, D. H. Reser, P.  
1346 Theodoni, K. H. Worthy, X.-J. Wang, D. K. Wójcik, P. P. Mitra, M. G. P. Rosa, Open access  
1347 resource for cellular-resolution analyses of corticocortical connectivity in the marmoset monkey.  
1348 *Nat. Commun.* **11**, 1133 (2020).
- 1349 65. A. Hladnik, D. Džaja, S. Darmopil, N. Jovanov-Milošević, Z. Petanjek, Spatio-temporal extension in  
1350 site of origin for cortical calretinin neurons in primates. *Front. Neuroanat.* **8**, 50 (2014).
- 1351 66. E. Y. Choi, B. T. T. Yeo, R. L. Buckner, The organization of the human striatum estimated by  
1352 intrinsic functional connectivity. *J. Neurophysiol.* **108**, 2242–2263 (2012).
- 1353 67. K. M. Anderson, F. M. Krienen, E. Y. Choi, J. M. Reinen, B. T. T. Yeo, A. J. Holmes, Gene  
1354 expression links functional networks across cortex and striatum. *Nat. Commun.* **9**, 1428 (2018).
- 1355 68. M. Matamales, J. Götz, J. Bertran-Gonzalez, Quantitative Imaging of Cholinergic Interneurons

- 1356 Reveals a Distinctive Spatial Organization and a Functional Gradient across the Mouse Striatum.  
1357 *PLoS One*. **11**, e0157682 (2016).
- 1358 69. E. Fino, M. Vandecasteele, S. Perez, F. Saudou, L. Venance, Region-specific and state-dependent  
1359 action of striatal GABAergic interneurons. *Nat. Commun.* **9**, 3339 (2018).
- 1360 70. A. B. M. Machado, C. B. Gonzales, A. Zeisel, H. Munguba, B. Bekkouche, N. G. Skene, P.  
1361 Lonnerberg, J. Ryge, K. D. Harris, S. Linnarsson, J. Hjerling-Leffler, Diversity of Interneurons in  
1362 the Dorsal Striatum Revealed by Single-Cell RNA Sequencing and PatchSeq. *Cell Rep.* **24**, 2179–  
1363 2190.e7 (2018).
- 1364 71. T. Zerucha, T. Stühmer, G. Hatch, B. K. Park, Q. Long, G. Yu, A. Gambarotta, J. R. Schultz, J. L.  
1365 Rubenstein, M. Ekker, A highly conserved enhancer in the Dlx5/Dlx6 intergenic region is the site of  
1366 cross-regulatory interactions between Dlx genes in the embryonic forebrain. *J. Neurosci.* **20**, 709–  
1367 721 (2000).
- 1368 72. T. Stuart, A. Srivastava, S. Madad, C. A. Lareau, R. Satija, Single-cell chromatin state analysis with  
1369 Signac. *Nat. Methods.* **18**, 1333–1341 (2021).
- 1370 73. N. L. Jorstad, J. H. T. Song, D. Exposito-Alonso, H. Suresh, N. Castro, F. M. Krienen, A. M. Yanny,  
1371 J. Close, E. Gelfand, K. J. Travaglini, S. Basu, M. Beaudin, D. Bertagnolli, M. Crow, S.-L. Ding, J.  
1372 Eggermont, A. Glandon, J. Goldy, T. Kroes, B. Long, D. McMillen, T. Pham, C. Rimorin, K. Siletti,  
1373 S. Somasundaram, M. Tieu, A. Torkelson, K. Ward, G. Feng, W. D. Hopkins, T. Höllt, C. Dirk  
1374 Keene, S. Linnarsson, S. A. McCarroll, B. P. Lelieveldt, C. C. Sherwood, K. Smith, C. A. Walsh, A.  
1375 Dobin, J. Gillis, E. S. Lein, R. D. Hodge, T. E. Bakken, Comparative transcriptomics reveals human-  
1376 specific cortical features. *bioRxiv* (2022), p. 2022.09.19.508480.
- 1377 74. D. Velmeshev, L. Schirmer, D. Jung, M. Haeussler, Y. Perez, S. Mayer, A. Bhaduri, N. Goyal, D. H.  
1378 Rowitch, A. R. Kriegstein, Single-cell genomics identifies cell type-specific molecular changes in  
1379 autism. *Science.* **364**, 685–689 (2019).
- 1380 75. W. B. Ruzicka, S. Mohammadi, J. F. Fullard, J. Davila-Velderrain, S. Subburaju, D. R. Tso, M.  
1381 Hourihan, S. Jiang, H.-C. Lee, J. Bendl, G. Voloudakis, V. Haroutunian, G. E. Hoffman, P. Roussos,  
1382 M. Kellis, PsychENCODE Consortium, Single-cell multi-cohort dissection of the schizophrenia  
1383 transcriptome. *bioRxiv* (2022), , doi:10.1101/2022.08.31.22279406.
- 1384 76. C. Nagy, M. Maitra, A. Tanti, M. Suderman, J.-F. Thérout, M. A. Davoli, K. Perlman, V. Yerko, Y.  
1385 C. Wang, S. J. Tripathy, P. Pavlidis, N. Mechawar, J. Ragoussis, G. Turecki, Single-nucleus  
1386 transcriptomics of the prefrontal cortex in major depressive disorder implicates oligodendrocyte  
1387 precursor cells and excitatory neurons. *Nat. Neurosci.* **23**, 771–781 (2020).
- 1388 77. A. Sequeira, F. Mamdani, C. Ernst, M. P. Vawter, W. E. Bunney, V. Lebel, S. Rehal, T. Klempan,  
1389 A. Gratton, C. Benkelfat, G. A. Rouleau, N. Mechawar, G. Turecki, Global brain gene expression  
1390 analysis links glutamatergic and GABAergic alterations to suicide and major depression. *PLoS One.*  
1391 **4**, e6585 (2009).
- 1392 78. D. Arendt, P. Y. Bertucci, K. Achim, J. M. Musser, Evolution of neuronal types and families. *Curr.*  
1393 *Opin. Neurobiol.* **56**, 144–152 (2019).
- 1394 79. R. N. Delgado, D. E. Allen, M. G. Keefe, W. R. Mancia Leon, R. S. Ziffra, E. E. Crouch, A.  
1395 Alvarez-Buylla, T. J. Nowakowski, Individual human cortical progenitors can produce excitatory  
1396 and inhibitory neurons. *Nature.* **601**, 397–403 (2022).



- 1397 80. B. Martynoga, H. Morrison, D. J. Price, J. O. Mason, Foxg1 is required for specification of ventral  
1398 telencephalon and region-specific regulation of dorsal telencephalic precursor proliferation and  
1399 apoptosis. *Dev. Biol.* **283**, 113–127 (2005).
- 1400 81. J. M. Tepper, F. Tecuapetla, T. Koós, O. Ibáñez-Sandoval, Heterogeneity and diversity of striatal  
1401 GABAergic interneurons. *Front. Neuroanat.* **4**, 150 (2010).
- 1402 82. J. DeFelipe, P. L. López-Cruz, R. Benavides-Piccione, C. Bielza, P. Larrañaga, S. Anderson, A.  
1403 Burkhalter, B. Cauli, A. Fairén, D. Feldmeyer, G. Fishell, D. Fitzpatrick, T. F. Freund, G. González-  
1404 Burgos, S. Hestrin, S. Hill, P. R. Hof, J. Huang, E. G. Jones, Y. Kawaguchi, Z. Kisvárdy, Y.  
1405 Kubota, D. A. Lewis, O. Marín, H. Markram, C. J. McBain, H. S. Meyer, H. Monyer, S. B. Nelson,  
1406 K. Rockland, J. Rossier, J. L. R. Rubenstein, B. Rudy, M. Scanziani, G. M. Shepherd, C. C.  
1407 Sherwood, J. F. Staiger, G. Tamás, A. Thomson, Y. Wang, R. Yuste, G. A. Ascoli, New insights into  
1408 the classification and nomenclature of cortical GABAergic interneurons. *Nat. Rev. Neurosci.* **14**,  
1409 202–216 (2013).
- 1410 83. R. Tremblay, S. Lee, B. Rudy, GABAergic Interneurons in the Neocortex: From Cellular Properties  
1411 to Circuits. *Neuron.* **91**, 260–292 (2016).
- 1412 84. E. Boldog, T. E. Bakken, R. D. Hodge, M. Novotny, B. D. Aevermann, J. Baka, S. Bordé, J. L.  
1413 Close, F. Diez-Fuertes, S.-L. Ding, N. Faragó, Á. K. Kocsis, B. Kovács, Z. Maltzer, J. M.  
1414 McCarrison, J. A. Miller, G. Molnár, G. Oláh, A. Ozsvár, M. Rózsa, S. I. Shehata, K. A. Smith, S.  
1415 M. Sunkin, D. N. Tran, P. Venepally, A. Wall, L. G. Puskás, P. Barzó, F. J. Steemers, N. J. Schork,  
1416 R. H. Scheuermann, R. S. Lasken, E. S. Lein, G. Tamás, Transcriptomic and morphophysiological  
1417 evidence for a specialized human cortical GABAergic cell type. *Nat. Neurosci.* **21**, 1185–1195  
1418 (2018).
- 1419 85. A. M. M. Sousa, Y. Zhu, M. A. Raghanti, R. R. Kitchen, M. Onorati, A. T. N. Tebbenkamp, B.  
1420 Stutz, K. A. Meyer, M. Li, Y. I. Kawasawa, F. Liu, R. G. Perez, M. Mele, T. Carvalho, M. Skarica,  
1421 F. O. Gulden, M. Pletikos, A. Shibata, A. R. Stephenson, M. K. Edler, J. J. Ely, J. D. Elsworth, T. L.  
1422 Horvath, P. R. Hof, T. M. Hyde, J. E. Kleinman, D. R. Weinberger, M. Reimers, R. P. Lifton, S. M.  
1423 Mane, J. P. Noonan, State, Matthew W, E. S. Lein, J. A. Knowles, T. Marques-Bonet, C. C.  
1424 Sherwood, M. B. Gerstein, N. Šestan, Molecular and cellular reorganization of neural circuits in the  
1425 human lineage. *Science.* **358**, 1027–1032 (2017).
- 1426 86. G. Paxinos, C. Watson, M. Petrides, M. Rosa, H. Tokuno, *The marmoset brain in stereotaxic*  
1427 *coordinates* (2012).
- 1428 87. F. M. Krienen, M. Goldman, Q. Zhang, R. C H Del Rosario, M. Florio, R. Machold, A. Saunders, K.  
1429 Levandowski, H. Zaniewski, B. Schuman, C. Wu, A. Lutservitz, C. D. Mullally, N. Reed, E. Bien, L.  
1430 Bortolin, M. Fernandez-Otero, J. D. Lin, A. Wysoker, J. Nemesh, D. Kulp, M. Burns, V. Tkachev,  
1431 R. Smith, C. A. Walsh, J. Dimidschstein, B. Rudy, L. S Kean, S. Berretta, G. Fishell, G. Feng, S. A.  
1432 McCarroll, Innovations present in the primate interneuron repertoire. *Nature.* **586**, 262–269 (2020).
- 1433 88. S. J. Fleming, M. D. Chaffin, A. Arduini, A.-D. Akkad, E. Banks, J. C. Marioni, A. A. Philippakis,  
1434 P. T. Ellinor, M. Babadi, Unsupervised removal of systematic background noise from droplet-based  
1435 single-cell experiments using CellBender. *bioRxiv* (2019), , doi:10.1101/791699.
- 1436 89. C. S. McGinnis, L. M. Murrow, Z. J. Gartner, DoubletFinder: Doublet Detection in Single-Cell RNA  
1437 Sequencing Data Using Artificial Nearest Neighbors. *Cell Syst.* **8**, 329–337.e4 (2019).
- 1438 90. L. Feng, T. Zhao, J. Kim, neuTube 1.0: A New Design for Efficient Neuron Reconstruction Software

1439 Based on the SWC Format. *eNeuro*. **2** (2015), doi:10.1523/ENEURO.0049-14.2014.

1440 91. R. C. Challis, S. Ravindra Kumar, K. Y. Chan, C. Challis, K. Beadle, M. J. Jang, H. M. Kim, P. S.  
1441 Rajendran, J. D. Tompkins, K. Shivkumar, B. E. Deverman, V. Gradinaru, Systemic AAV vectors  
1442 for widespread and targeted gene delivery in rodents. *Nat. Protoc.* **14**, 379–414 (2019).

1443 **Acknowledgements:**

1444 We thank Tim Blosser for his early involvement in developing the spatial transcriptomics workflows. We  
1445 thank Atsushi Takahashi for assistance with MRI scanning for animals receiving local viral injections.  
1446 We thank the MIT veterinarian staff for animal husbandry and for their assistance with surgical  
1447 procedures. We thank Monika Burns and Yuanyuan Hou for assistance with AAV IV injections and  
1448 animal perfusions.

1449

1450 **Funding:**

1451 National Institutes of Health grant U01MH114819 (GF, SAM, EB)  
1452 The National Institute of Neurological Disorders and Stroke grant UG3NS111689 (BED)  
1453 NSF GRFP # 1745302 (MES)  
1454 MathWorks Science Fellowship (MES)  
1455 Collamore-Rogers Fellowship at MIT (MES)  
1456 NSF GRFP # 1122374 (TWS)  
1457 Broad Institute’s Stanley Center for Psychiatric Research (SAM, GF, BED)  
1458 Dean’s Innovation Award (Harvard Medical School) (SAM)  
1459 Hock E. Tan and K. Lisa Yang Center for Autism Research at MIT (GF)  
1460 Poitras Center for Psychiatric Disorders Research at MIT (GF)  
1461 McGovern Institute for Brain Research at MIT (GF)

1462

1463 **Author Contributions:**

1464 RNA/ATAC Data Generation: FMK, MG, AL  
1465 Spatial Data Generation: KML, HZ  
1466 Data Analysis: FMK, KML, HZ, RCHdR, MES, MG, AL, KXL, VFB-G, TWS, SAM  
1467 Data Interpretation: FMK, KML, HZ, RCHdR, MES, MG, KXL, VFB-G, SB, EB, SAM, GF  
1468 Tissue Samples/Tissue Processing: FMK, KML, HZ, MG, AL, QZ, GC, SB  
1469 AAV design, generation & experiments: MW, CC, QZ, JS, SJV, JD, KC, BED  
1470 Morphology Data generation/analysis: KML, HZ, VFB-G, TWS, AM, EB  
1471 Software/Data management: FMK, RCHdR, MG, AW, JN, SK  
1472 Writing: FMK, KML, HZ, MES, VFB-G, SAM, GF

1473

1474 **Competing interests:** Authors declare that they have no competing interests.

1475

1476 **Data and materials availability:**

1477 Raw sequence data were produced as part of the BRAIN Initiative Cell Census Network are available for  
1478 download from the Neuroscience Multi-omics Archive  
1479 (<https://assets.nemoarchive.org/dat-1je0mn3>) and the Brain Cell Data Center (<https://biccn.org/data>).  
1480 Morphological reconstructions and single molecule FISH of interneuron types are available for download  
1481 through the Brain Image Library ([https://submit.brainimagelibrary.org/search?grant\\_number=1-U01-](https://submit.brainimagelibrary.org/search?grant_number=1-U01-)

1482 [MH114819-01](#)). The AAV-BI103 rep-cap plasmid will be made available through Addgene upon  
1483 publication of the characterization of this capsid and through direct requests to Ben Deverman.

1484 **Supplementary Materials:**

1485 Figs. S1-S11

1486 Table S1-S7

1487 Data S1-S2

1488 Legends:

FIGURE 1

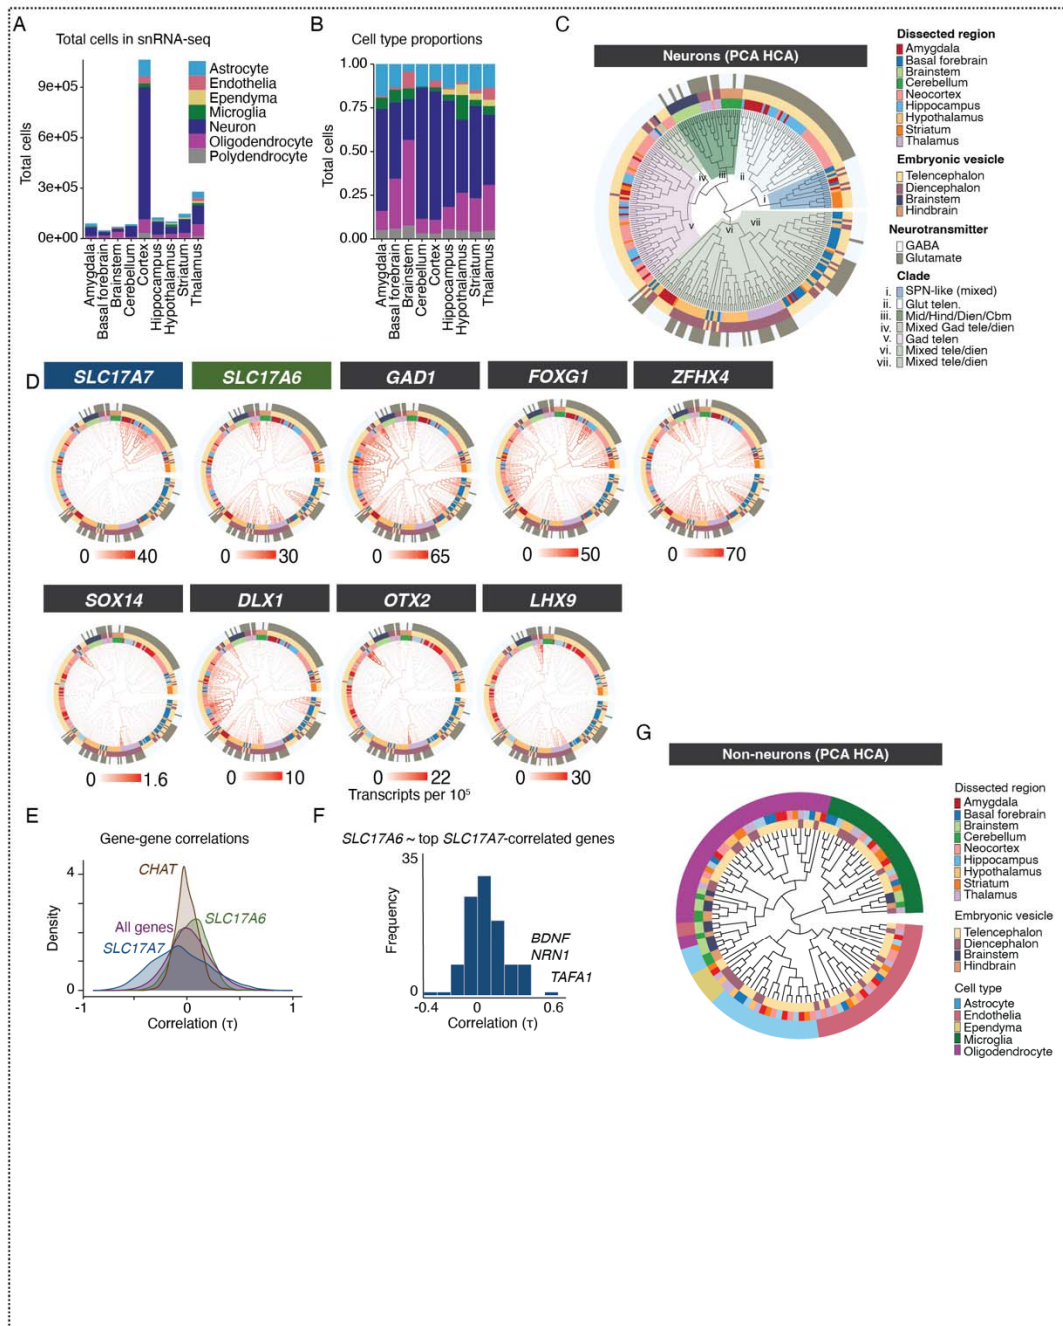

1490 **Figure 1. Single nucleus RNA sequencing of marmoset brain.** (A) Number of nuclei per brain  
1491 structure. Colors indicate cell classes. (B) Proportions of cell classes across brain structures. (C) Neurons  
1492 in each dissected region are clustered separately, then pseudo-bulked “metacells” of all 288 clusters are  
1493 arranged in the dendrogram using hierarchical clustering of top 100 PCA scores of expressed genes. Outer  
1494 rings colored by dissected subregion (1st ring), cephalic vesicle (2nd ring) and major neurotransmitter  
1495 usage (3rd ring). Seven major “clades” are colored and labeled according to cell type and regional  
1496 composition of clade. (D) Expression of markers for glutamatergic neurons (*SLC17A7*, *SLC17A6*),  
1497 GABAergic neurons (*GAD1*), and transcription factors (*FOXP1*, *ZFHX4*, *SOX14*, *DLX1*, *OTX2*, *LHX9*)  
1498 are plotted as heatmaps on dendrogram shown in (C). These transcription factors are largely restricted to  
1499 specific clades or are associated with particular cephalic vesicles. (E) Gene-gene correlation (Spearman  
1500 tau) distributions across all neuron clusters in (C) for *SLC17A7*, *SLC17A6*, and *CHAT* (marker for  
1501 cholinergic neurons) as well as background (all genes). The distribution of pairwise correlations to *CHAT*  
1502 had a lower standard deviation (mean  $r = 0.002$ , std. dev = 0.116) relative to baseline gene-gene  
1503 correlations (mean  $r = 0.02$ , std. dev = 0.199;  $F(5078, 17315809) = 0.33$ ,  $p\text{-adj} < 1e-15$ ). In contrast,  
1504 pairwise correlations to *SLC17A7* were much broader relative to the background distribution of all gene-  
1505 gene correlations. (F) Distribution of cross-cell-type correlation to *SLC17A6* of genes most correlated  
1506 with *SLC17A7* (top 116 genes with Spearman tau  $> 0.5$  to *SLC17A7*). (G) Same hierarchical clustering  
1507 procedure as (C) but for non-neuronal cell types. Outer ring colors indicate major non-neuronal cell class.  
1508 Inner ring colors indicate region dissection and vesicle; colors as in (C).



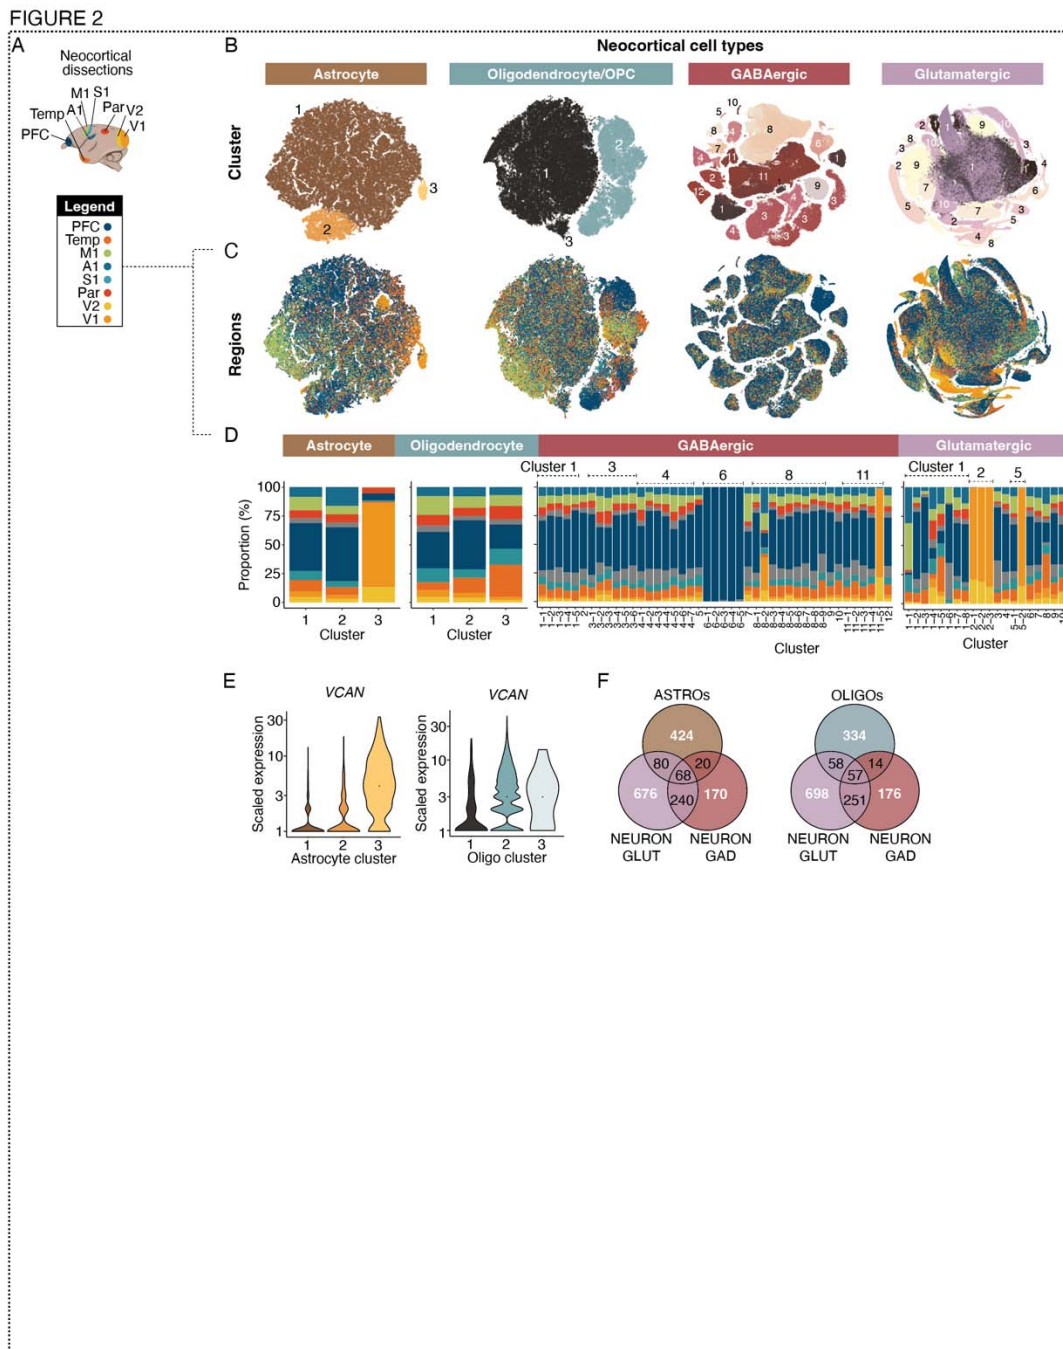

1509  
1510  
1511  
1512

**Figure 2. Regional variation in neocortical cell types and expression patterns.** (A) Cortical regions sampled. (B) t-SNE embeddings of neocortical macroglia (astrocytes, oligodendrocyte lineage types) and neurons (GABAergic interneurons, glutamatergic neurons). Colors represent clusters (numbered). (C)

1513 Same as (B) but cells colored by neocortical dissection. **(D)** Regional proportions of each cluster, colors  
1514 same as (A). **(E)** *VCAN* expression across astrocyte clusters and oligodendrocyte lineage clusters. Colors  
1515 as in (B). **(F)** Venn diagrams showing overlap of neocortical regionally differentially expressed genes  
1516 (rDEGs) across GABAergic neurons, glutamatergic neurons, astrocytes and oligodendrocyte lineage cells.  
1517 rDEGs are defined as > 3 fold expression difference in homologous cell types across pairs of cortical  
1518 regions.

FIGURE 3

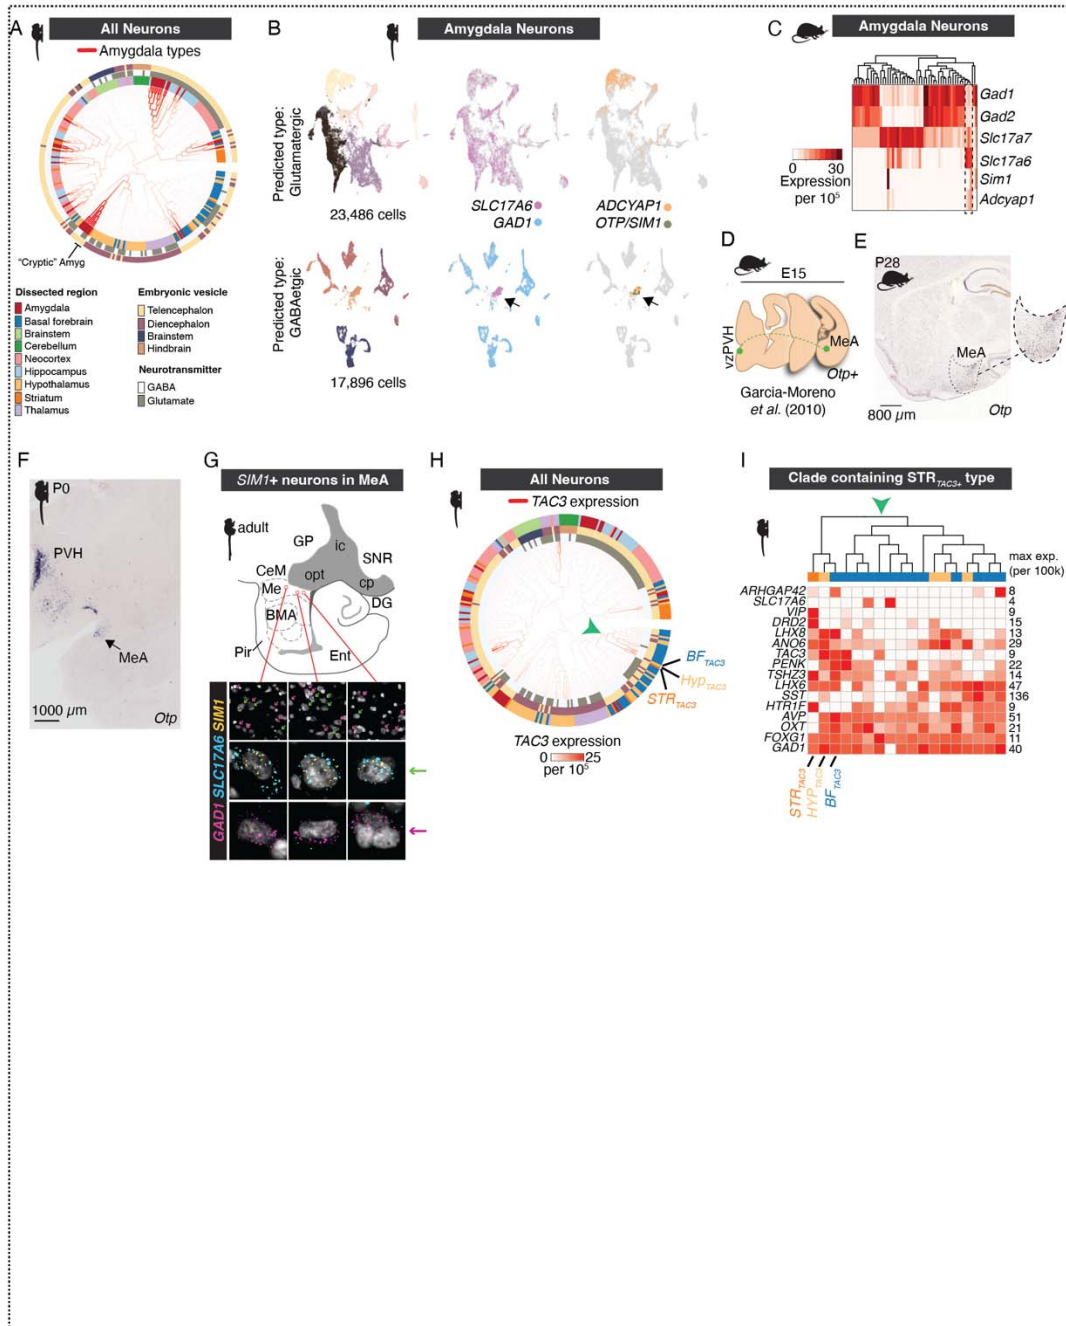

1519  
1520  
1521

**Figure 3. Examples suggesting cross-cephalic-boundary cell type migration. (A)** Locations of amygdala clusters in the dendrogram from **Fig. 1C**. **(B)** Clustering of marmoset amygdala cells (n =

1522 44,165 neurons) predicted to be glutamatergic (top row) or GABAergic (bottom row) based on a linear  
1523 classifier (scPred) trained on supervised cell type models. t-SNEs for each class are colored by cluster  
1524 (first column) or genes (*SLC17A6*, *GAD1*, *ADCYAP1*, *OTP*, *SIMI*). Arrowhead indicates cluster of  
1525 neurons that are classified as GABAergic yet do not express *GAD1* and do express *SLC17A6*. (C)  
1526 snRNA-seq from mouse amygdala neurons. Heatmap shows normalized, scaled expression of  
1527 neurotransmitters in neurons from snRNA-seq of adult mouse amygdala (n = 25,930 nuclei, 3 replicates  
1528 pooled). Dendrogram shows hierarchical clustering of neuron types. Dotted outline shows presence of 3  
1529 *Slc17a6*<sup>+</sup> subtypes that preferentially cluster with GABAergic (*GAD1*<sup>+</sup>/*GAD2*<sup>+</sup>) subtypes and that  
1530 express *Sim1* and/or *Adcyap1*. (D) Cartoon of embryonic migration of *Otp*<sup>+</sup> cells that migrate from  
1531 proliferative zones around the 3rd ventricle to periventricular hypothalamus (vzPZH) and medial  
1532 amygdala (MeA), following data in Garcia-Moreno et al. (45). (E) ISH for *Otp* in sagittal section of P28  
1533 mouse brain. Dotted outline indicates borders of medial amygdala (MeA). (F) Marmoset P0 coronal  
1534 section showing ISH staining for *OTP*. Data from (<https://gene-atlas.brainminds.jp/>; (Shimogori et al.  
1535 2018; Kita et al. 2021)). (G) Cartoon of marmoset amygdala the sagittal plane. FISH staining for *GAD1*  
1536 (magenta), *SLC17A6* (cyan), and *SIMI* (yellow) in the medial amygdala (Me). Magenta arrows highlight  
1537 *GAD1* expressing nuclei. Green arrows highlight *SLC17A6* and *SIMI* dual expressing nuclei. (H)  
1538 Marmoset neuronal dendrogram shown in **Fig. 1C** with clades colored by *TAC3* expression.  
1539 Unexpectedly, a novel primate-specific striatal *TAC3* population (3) clusters with hypothalamic and basal  
1540 forebrain populations, and not with other telencephalic GABAergic interneurons. Red arrowhead  
1541 indicates clade containing three *TAC3*<sup>+</sup> populations found in striatum, basal forebrain, and hypothalamus.  
1542 (I) Heatmap of genes expressed in the clade indicated by red arrowhead in (H). Expression values of each  
1543 gene is normalized to its max within the clade. The three *TAC3*<sup>+</sup> populations are labeled and each show  
1544 distinct expression differences.

FIGURE 4

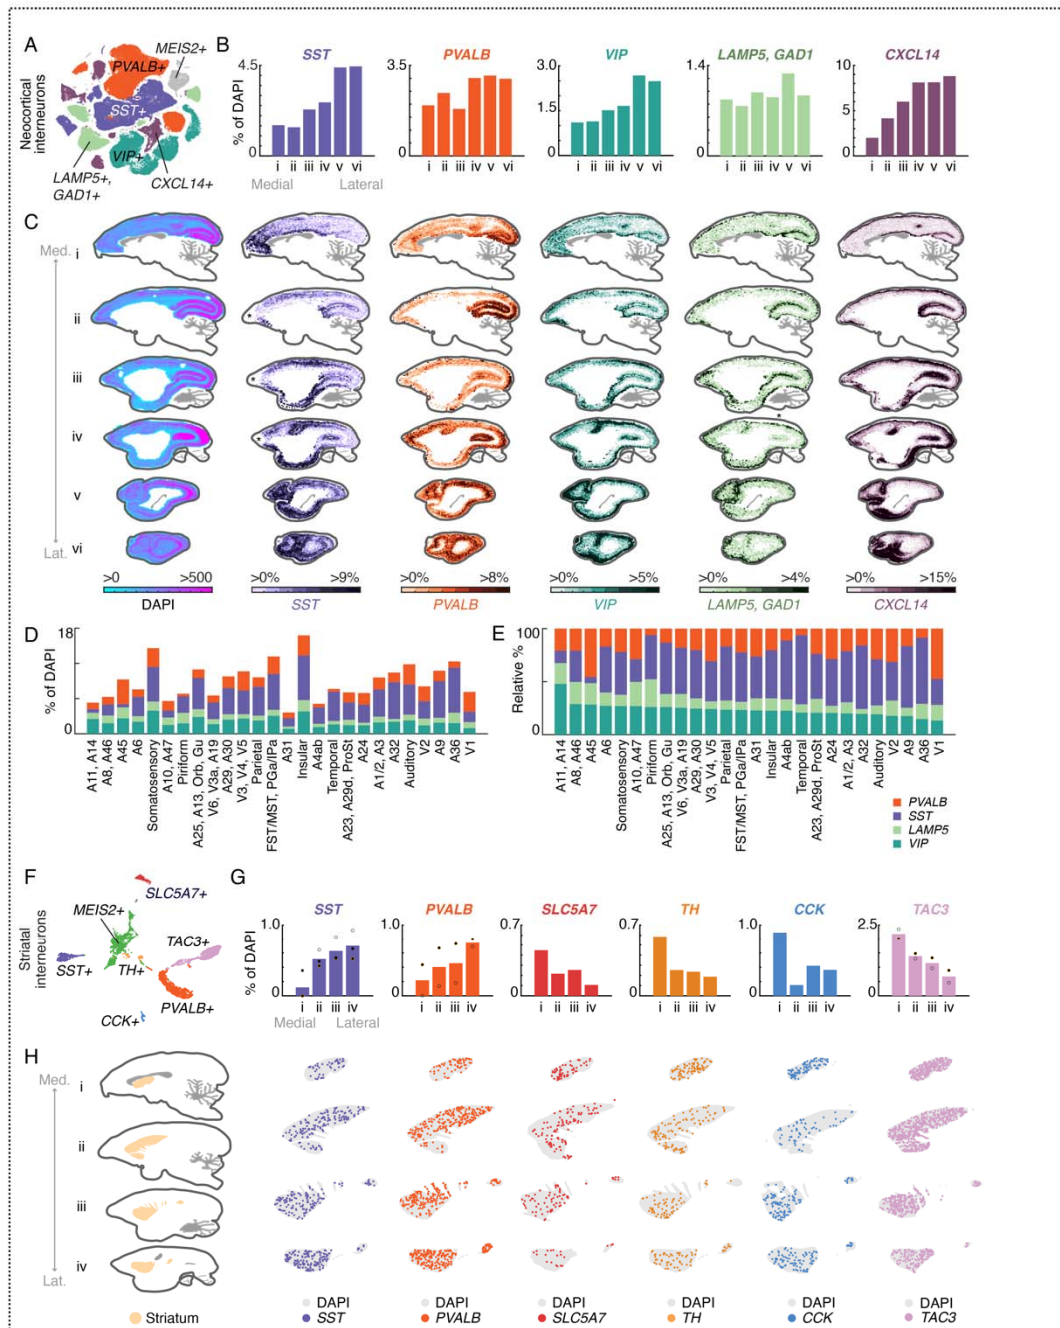

1545  
1546  
1547

**Figure 4. Cell-type-specific distributions of interneurons in primate telencephalon using quantitative smFISH. (A)** t-SNE of GABAergic neocortical interneurons as in **Fig. 2B**, colored by



1548 subclass marker (*PVALB*, *SST*, *VIP*, *LAMP5*, *CXCL14*). Gray points are the *MEIS2*<sup>+</sup> population that is  
1549 restricted to orbiomedial prefrontal cortex and was not spatially profiled. **(B)** Medial-lateral proportions of  
1550 each major class as percentage of all cells (DAPI<sup>+</sup>). Barplots quantify positive cells as proportion of all  
1551 (DAPI<sup>+</sup>) cells from medial to lateral sections of smFISH performed on 6 thin (16  $\mu\text{m}$ ) sagittal sections of  
1552 marmoset neocortex, each section being 1600  $\mu\text{m}$  apart and covering 9600  $\mu\text{m}$  of neocortex. Colors as in  
1553 (A). **(C)** smFISH for neocortical interneuron subclass markers showing locations of cells positive for each  
1554 marker across 6 sagittal sections of the marmoset neocortex. First column shows density of all DAPI<sup>+</sup>  
1555 nuclei per unit area (approximately 387  $\mu\text{m}$  per bin) profiled from one series. Heatmap scale in  
1556 subsequent columns show percentage of marker-positive cells relative to DAPI<sup>+</sup> cells. Average  
1557 proportions across section shown in (B). Med. = medial, Lat. = Lateral. Asterisks in section ii and iii of  
1558 the *SST* series and iv of the *LAMP5* series denote regions where tissue or staining artifacts caused loss of  
1559 signal. These can be seen in the DAPI-only series of these experiments, which show lower overall cell  
1560 counts at these locations (**Fig S7**). **(D)** Quantitation of interneuron proportions by cortical area parcellated  
1561 according to **Fig. S8B-C**. **(E)** Relative percentages of interneuron proportions by cortical area shown in  
1562 Fig. S8B-C, sorted by max relative proportion of *VIP*<sup>+</sup> interneurons. **(F)** t-SNE of striatal, cholinergic  
1563 neurons (*SLC5A7*) and GABAergic interneurons (*SST*, *PVALB*, *TH*, *CCK*, *TAC3*). Green points  
1564 correspond to the *MEIS2*<sup>+</sup> population and were not spatially profiled. **(G)** Medial-lateral gradients of  
1565 striatal cell type proportions across 4 sagittal sections. Dots = individual replicates. Colors as in (F). **(H)**  
1566 smFISH for striatal cholinergic and interneuron subclass markers showing locations of cells positive for  
1567 each subclass marker across 4 (16  $\mu\text{m}$ ) sagittal sections of the marmoset striatum, each 1600  $\mu\text{m}$  apart  
1568 covering 6400  $\mu\text{m}$  in total. First column shows the anatomical context of the four sagittal striatal planes.  
1569 Average proportions across each section are shown in (G).

FIGURE 5

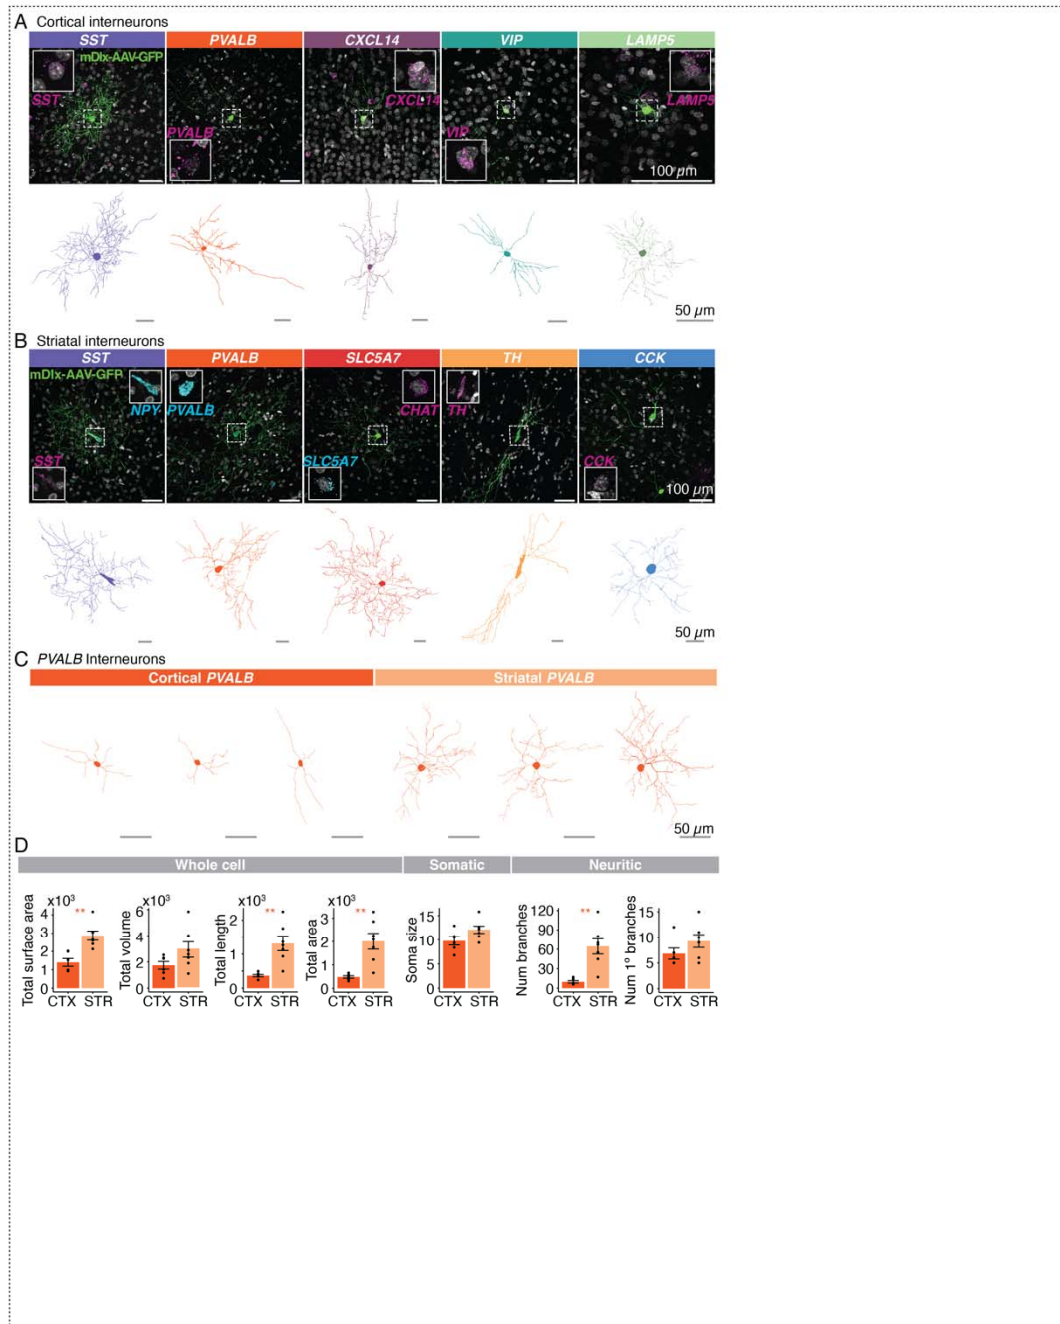

1570  
1571  
1572

**Figure 5. Morphological characteristics of marmoset cortical and striatal interneurons. (A-B) Top rows, Examples of AAV9-hDlx5/6-GFP-fGFP labeled neocortical (A) and striatal (B) interneurons. Insets**

1573 show magnified cell nucleus of GFP+ cell along with smFISH staining for interneuron type marker to  
1574 confirm molecular identity of labeled cell. Scale Bar = 100  $\mu\text{m}$ . *Bottom rows*, Reconstructed skeletonized  
1575 morphology (Imaris) of GFP+ cells depicted in *top rows*. Scale Bar = 50  $\mu\text{m}$ . **(C)** Representative  
1576 reconstructed neocortical and striatal *PVALB*+ interneurons from one marmoset (Cj 17-154; **Table S1,**  
1577 **S6**). Scale Bar = 50  $\mu\text{m}$ . **(D)** Quantification of morphological characteristics of *PVALB*+ cells from Cj 17-  
1578 154. Means  $\pm$  SEM. \* $P < 0.05$  and \*\* $P < 0.01$ . See the Methods section for detailed statistical  
1579 information.

FIGURE 6

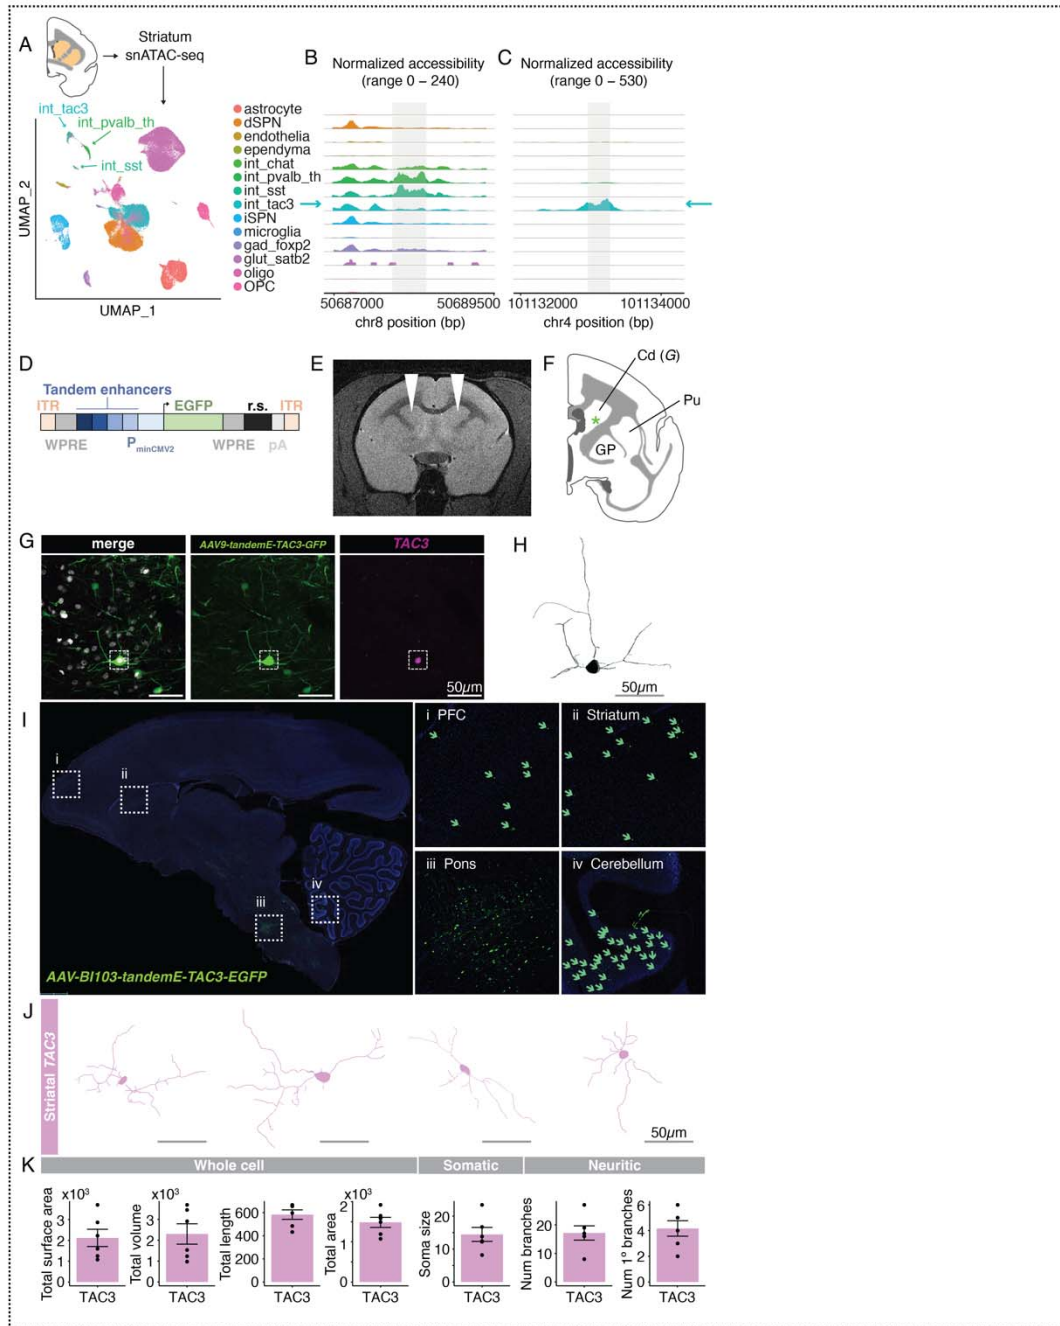

1581 **Figure 6. Development of a novel enhancer-AAV for *TAC3*+ primate-specific striatal interneurons.**  
1582 **(A)** snATAC-seq (69,808 nuclei) from fresh marmoset striatum (1 male, Cj 18-153). UMAP shows major  
1583 clusters with labels transferred from striatal snRNA-seq data. **(B)** Chromatin accessibility at the locus  
1584 corresponding to the mDlx sequence in marmoset shows read pileups in *PVALB*, *SST*, and *CHAT*+  
1585 neurons, but not in the *TAC3*+ type. **(C)** Chromatin accessibility of a candidate selective enhancer for the  
1586 *TAC3*+ type. **(D)** Sequence construct design for *TAC3* interneuron specific AAV. Four *TAC3* interneuron-  
1587 specific regulatory elements (example in (C)) are packaged in tandem upstream of a minimal promoter  
1588 driving EGFP expression. ITR = inverted terminal repeats. WPRE = Woodchuck Hepatitis Virus  
1589 Posttranscriptional Regulatory Element. PminCMV2 = minimal CMV2 promoter. EGFP = enhanced  
1590 green fluorescent protein. R.S. = 300 bp random sequence. pA = polyadenylation sequence. **(E)** MRI  
1591 showing injection location (white arrowheads) of the AAV9-tandemE-*TAC3*-EGFP virus into bilateral  
1592 dorsal striatum (caudate) in one animal (Cj 19-207, **Table S1**). **(F)** Cartoon showing location of cell  
1593 shown in (G). **(G)** Main: EGFP antibody-amplified confocal image of a labeled cell (position shown in  
1594 (F)). Insets: smFISH for *TAC3* showing colocalization. Scale bar = 50  $\mu$ m. **(H)** Morphological  
1595 reconstruction (Imaris) of cell shown in (G). Scale bar = 50  $\mu$ m. **(I)** Whole sagittal section (20x image) of  
1596 adult marmoset showing cells transduced by the AAV-BI103-tandemE-*TAC3*-EGFP virus in marmoset  
1597 Cj 20-214. GFP+/*TAC3*+ cells were detected sparsely in neocortex as well as striatum, cerebellum,  
1598 substantia nigra, superior colliculus, and brainstem. (i) Prefrontal cortex, (ii) Striatum, (iii) Pons, (iv)  
1599 Cerebellum. Green arrows highlight cells in areas with sparse expression. **(J)** Four reconstructions  
1600 (Imaris) of striatal GFP+/*TAC3*+ cells from similar section shown in (I). **(K)** Quantification of  
1601 morphological parameters of reconstructed cells from striatal GFP+/*TAC3*+ cells from the local injection  
1602 in (E) as well as the systemic injection in (I) (**Table S6**).



Supp S1

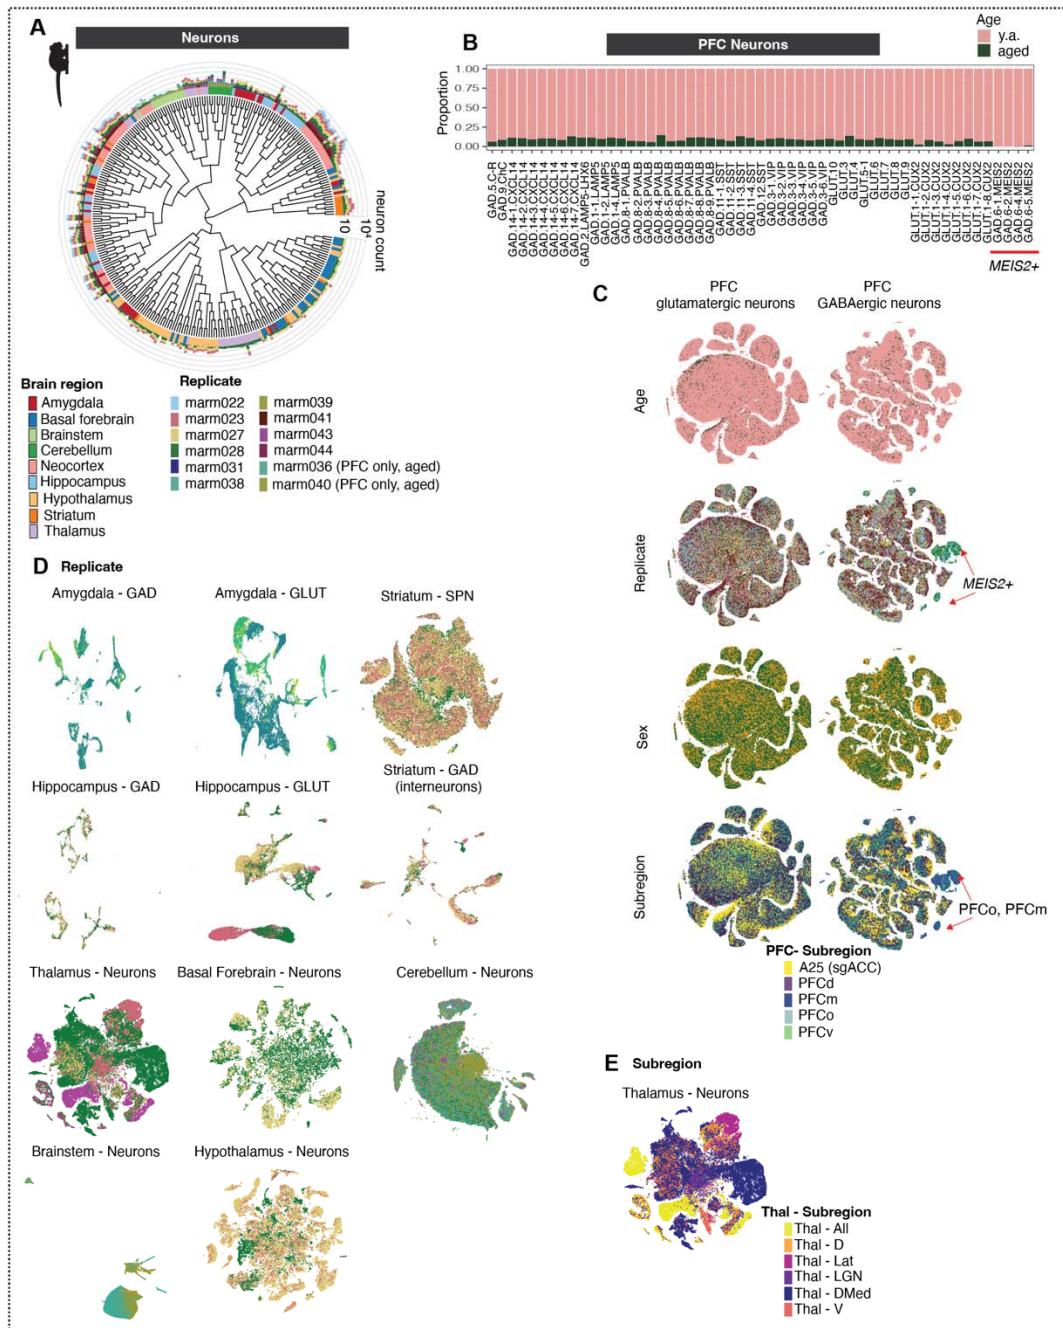

1603  
1604  
1605

**Figure S1. Neuron counts by donor across brain regions. (A)** Neuronal dendrogram as in **Fig. 1C**, with outer barplots depicting number of nuclei per cell type and replicate. Ring colors are brain regions,

1606 colors in barplots correspond to replicates. **(B)** Proportional per-cluster representation of PFC neurons  
1607 between young adult donors and aged (n=2) donors. While our snRNA-seq collection focused on post-  
1608 sexual maturity young adults, we acquired an additional dataset of PFC sampled from 2 aged animals (1  
1609 M, 11y0m; 1F, 14y4m, 37,260 cells total; **Table S1**). Individual replicates contributed similar proportions  
1610 of neurons to each prefrontal neuron subtype, and clusters generally had proportional representation  
1611 across young adults and aged animals, as well as across males and females (**Fig. S1B-C**), suggesting that  
1612 these variables do not dramatically impact neuronal ensembles and identities in prefrontal cortex. **(C)** t-  
1613 SNE embeddings of PFC neurons (*top row*, GABAergic; *bottom row*, glutamatergic) with colors  
1614 representing different metadata: age (young vs aged), replicate, PFC subregion. There was notable  
1615 enrichment of *MEIS2*+ GABAergic neurons in medial prefrontal and orbital prefrontal dissections (**Fig.**  
1616 **S1C**). Based on their gene expression profiles, these cells likely correspond to the recently described  
1617 population of LGE-derived *MEIS2*+ neurons that populate the olfactory bulb in mice, and which are  
1618 instead directed to medial prefrontal cortex in macaques and humans (33). **(D)** t-SNEs of neurons in each  
1619 brain structure, with cells colored by replicate (colors as in (A)). Telencephalic neurons are plotted  
1620 separately by class: GABAergic and glutamatergic classes (neocortex, hippocampus, amygdala), or  
1621 GABAergic interneurons and spiny projection neurons (striatum). Compared with neocortex, greater  
1622 cross-donor variability was observed in some subcortical structures such as hypothalamus and thalamus,  
1623 though this was likely driven more by dissection variability than by donor variability, as the donor-  
1624 specific clusters tended to be from subregions that were only sampled in one individual (see E). **(E)** t-  
1625 SNEs of thalamic neurons with cells colored by thalamic subdivision.  
1626

Supp S2

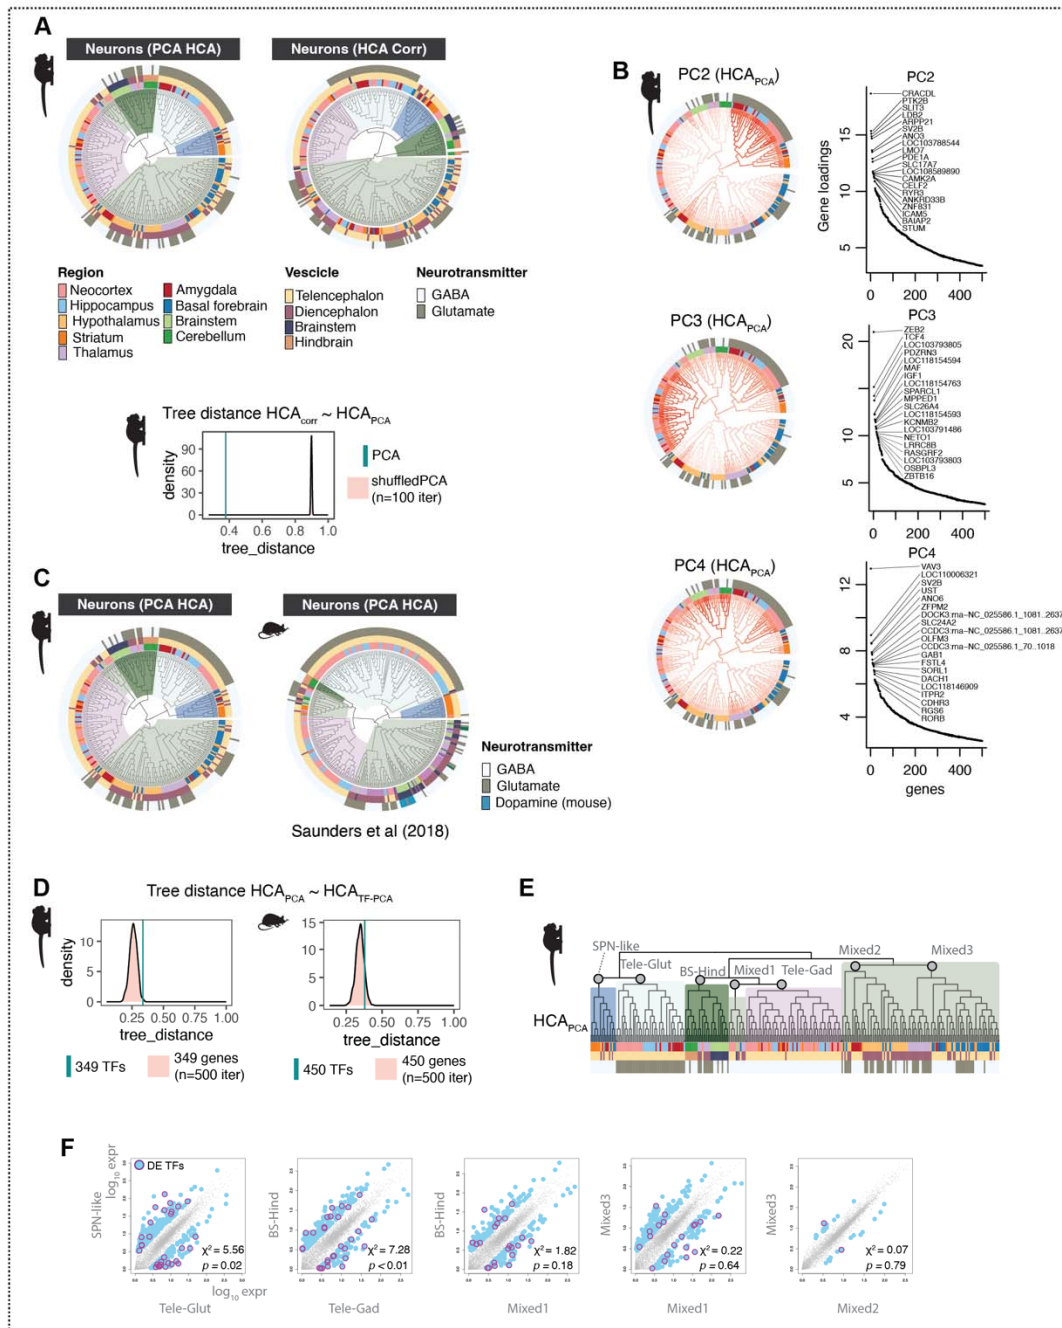

1627

1628

1629

**Figure S2. Conservation of neuronal hierarchy across species and clustering methods. (A)**

Comparison of marmoset and mouse neurons (mouse atlas data from (6)) using three different distance

1630 calculations for hierarchical clustering:  $HCA_{corr}$  distance = gene expression correlations of top 5904 genes  
1631 in marmoset or 3528 in mouse (mouse genes include all genes with 1:1 orthologs to the 5904 marmoset  
1632 genes and that are expressed in at least 10 transcripts per 100,000 in at least one mouse neuron type);  
1633  $HCA_{PCA}$  distance = top 100 PCA scores across the same genes;  $HCA_{TF-PCA}$  distance = top 100 PCA scores  
1634 using expressed transcription factors only (marmoset = 349 TFs, mouse = 450 TFs). **(B)** Distance between  
1635 hierarchical clustering (HC) dendrogram trees computed using different methods. Cyan line = tree  
1636 distance (R package TreeDist) between hierarchical clustering using distance =  $HCA_{corr}$  and using  
1637 distance =  $HCA_{PCA}$ . Pink distribution is tree distance scores between  $HCA_{corr}$  and shuffled PCA scores (n  
1638 = 100 shuffling iterations). Lower values of tree\_distance (x-axis) mean higher agreement between  
1639 dendrogram tree structures. **(C)** PCA loadings and top genes for PC2-PC4. PC scores are plotted on the  
1640  $HCA_{PCA}$  dendrogram. Ranked gene loading plots show top 20 genes per PC. **(D)** Tree distances computed  
1641 as in **(B)** between  $HCA_{PCA}$  and  $HCA_{TF-PCA}$ . The tree distances between these two trees is low, but not  
1642 different from distributions of random, same-sized sets of genes. **(E)** Marmoset dendrogram in **Fig. 1C**  
1643 ( $HCA_{PCA}$ ) indicating major clades compared in **(F)**. **(F)** Ancestral reconstruction (AR; R package  
1644 phytools) of gene expression profiles of major clades of marmoset neuron types from dendrogram in **(E)**.  
1645 Maximum likelihood estimates of gene expression (fastAnc) were computed for 7 major internal nodes  
1646 (gray circles) of the  $HCA_{PCA}$  dendrogram. Scatterplots show pairwise comparisons between AR of  
1647 internal nodes of major clades. Blue dots = genes with >3 foldchange difference between the two ARs.  
1648 Magenta circles = differentially expressed transcription factors (DE-TFs). Chi-square and p-values  
1649 describe whether TFs are significantly differentially enriched between the AR pairs.  
1650



Supp S3

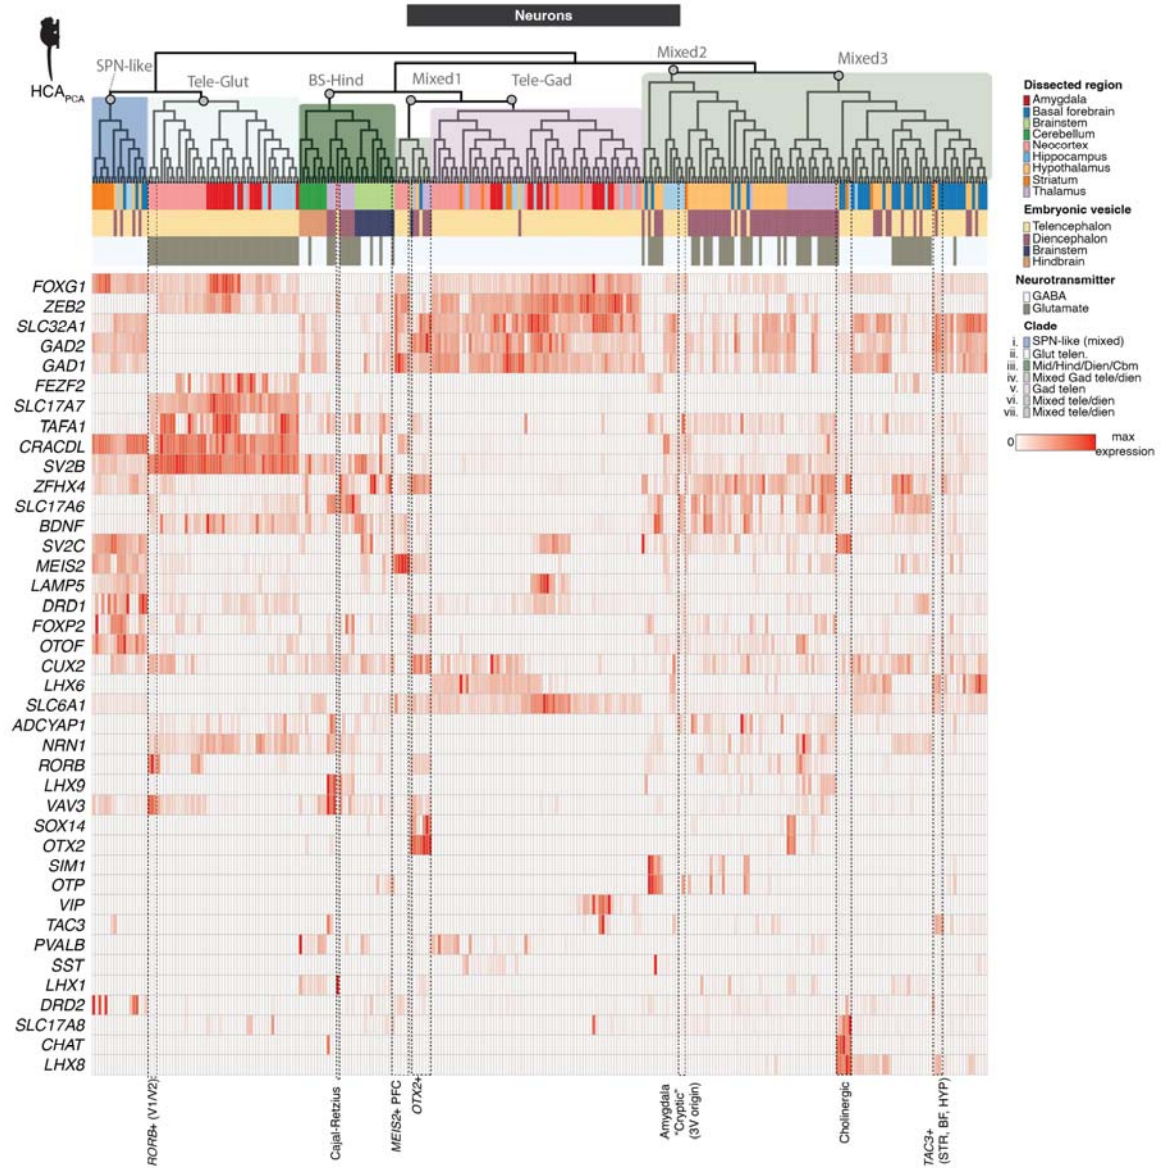

1651  
 1652 **Figure S3. Gene expression across neural populations.** Expression of broad class marker genes and  
 1653 other genes of interest across all neurons sampled by snRNA-seq. Heatmap colors are scaled to max



1654 normalized expression for each row (gene). Dendrogram ordering and metadata colors as in **Fig. 1C**. Cell  
1655 types discussed in the main text are labeled at bottom.  
1656

Supp S4 related to Fig 2

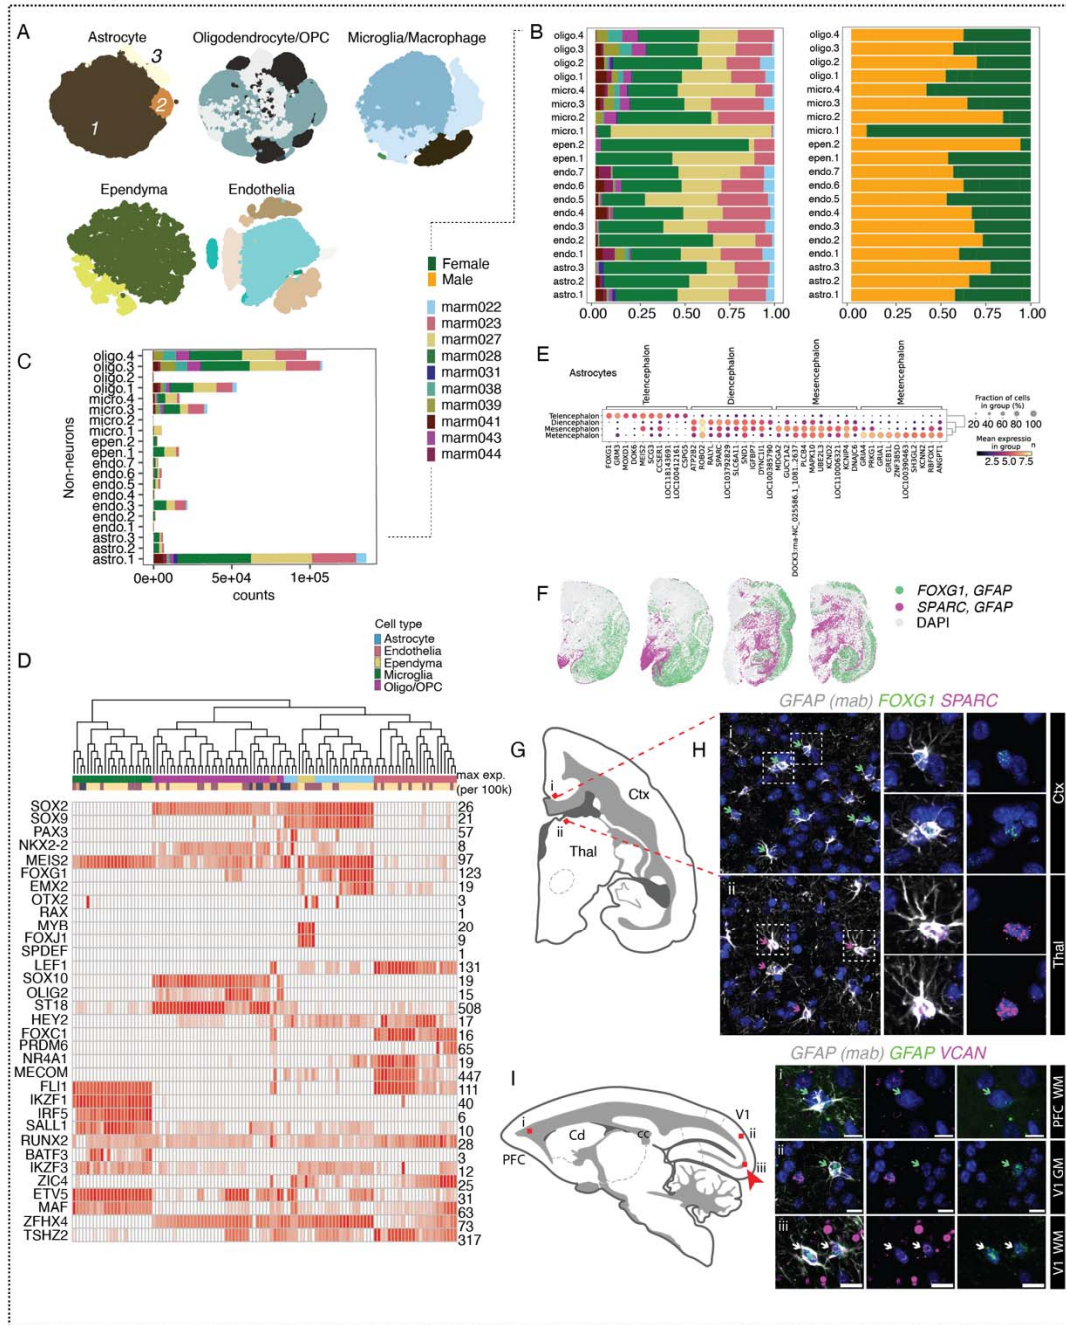

1657  
1658  
1659

**Figure S4. Glia diversity across regions.** (A) t-SNE embeddings of major non-neuronal types colored by cluster. (B) Barplots of glial proportions colored by donor and by sex. (C) Non-neuronal nuclei counts.

1660 Colors indicate donor, same as (B). **(D)** Expression of marker genes in non-neurons. Genes as in (8).  
1661 Heatmap colors are scaled to max normalized expression for each row (gene). Dendrogram and metadata  
1662 colors as in **Fig. 1G**. **(E)** Differentially expressed genes in astrocytes across cephalic compartments. **(F)**  
1663 Tissue validation for astrocyte differentially expressed genes (*FOXG1*, *SPARC*) in coronal sections of  
1664 marmoset brain. Green dots indicate locations of cells that stain positive for *GFAP* (IHC, mAb **Table S4**)  
1665 and *FOXG1* (smFISH). Magenta dots indicate cell positions for *GFAP* (IHC) and *SPARC* (smFISH). **(G)**  
1666 Cartoon of coronal section imaged; Red boxes (*i-ii*) correspond to tissue validation in (H). **(H)** (*Left*)  
1667 Fields of view from neocortex and thalamus stained for *GFAP* antibody (gray), *FOXG1* (green), and  
1668 *SPARC* (magenta). Green arrows highlight *GFAP* cells colocalized with *FOXG1*, magenta arrows  
1669 highlight *GFAP* cells colocalized with *SPARC*. (*Right*) Magnified examples of double positive cells in  
1670 neocortex and thalamus. Ctx = cortex, Thal = thalamus. **(I)** (*Left*) Cartoon of sagittal section imaged; red  
1671 boxes (*i-iii*) correspond to (*Right*) tissue validation of increased abundance of *VCAN*<sup>+</sup> astrocytes in adult  
1672 marmoset V1-adjacent white matter (*iii*) compared with PFC-adjacent white matter (*i*) and V1 gray  
1673 matter (*ii*). *GFAP* antibody (gray) combined with smFISH probes against *VCAN* (magenta) and *GFAP*  
1674 (green). Green arrows correspond to *GFAP*<sup>+</sup> (antibody), *GFAP*<sup>+</sup> (smFISH) cells. White arrows  
1675 correspond to *GFAP*<sup>+</sup> (antibody), *GFAP*<sup>+</sup> (smFISH), and *VCAN*<sup>+</sup> cells. V1 = visual cortex V1, PFC =  
1676 prefrontal cortex, GM = gray matter, WM = white matter. Red arrow highlights locale of *VCAN*<sup>+</sup> *GFAP*<sup>+</sup>  
1677 images. Scale bar = 10  $\mu$ m.

Supp S5 related to Fig 2

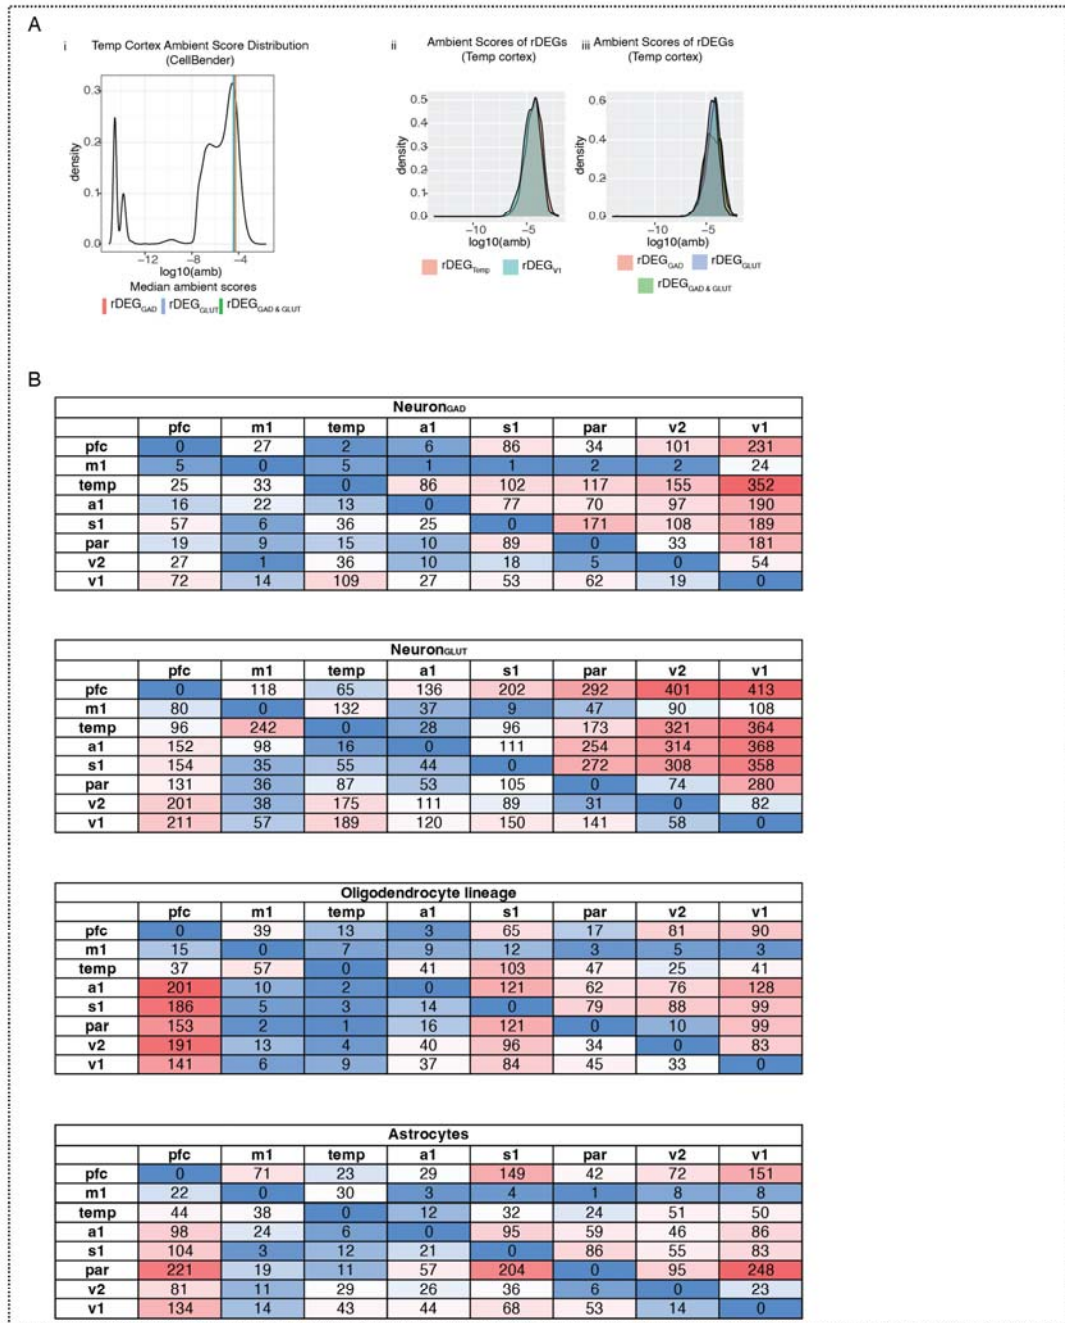

1678  
1679  
1680

**Figure S5. Cortical rDEGs are defined across cell types and do not reflect ambient RNA contamination.** (A) (i) rDEG ambient score distributions (from CellBender) in temporal cortex samples,

1681 which had amongst the highest numbers of rDEGs compared to other neocortical regions. Despite  
1682 glutamatergic neurons being more numerous and having more expressed genes/transcripts per cell, the  
1683 median ambient contamination scores for glutamatergic rDEGs were not higher than median  
1684 contamination scores for GABAergic rDEGs. rDEGs shared between glutamatergic and GABAergic  
1685 neurons had indistinguishable scores compared with rDEGs private to one neuronal class. *(ii)* Ambient  
1686 scores in temporal cortex of temporal cortex rDEGs are indistinguishable from V1 rDEGs. *(iii)*  
1687 Distributions of temporal cortex rDEG ambient scores by neuron class, again showing no difference  
1688 between rDEGs that are shared or private to a neuronal class. **(B)** Numbers of regionally differentially  
1689 expressed genes (rDEGs) between pairs of cortical regions for neurons, astrocytes, and oligodendrocyte  
1690 lineage types.



FIGURE S6

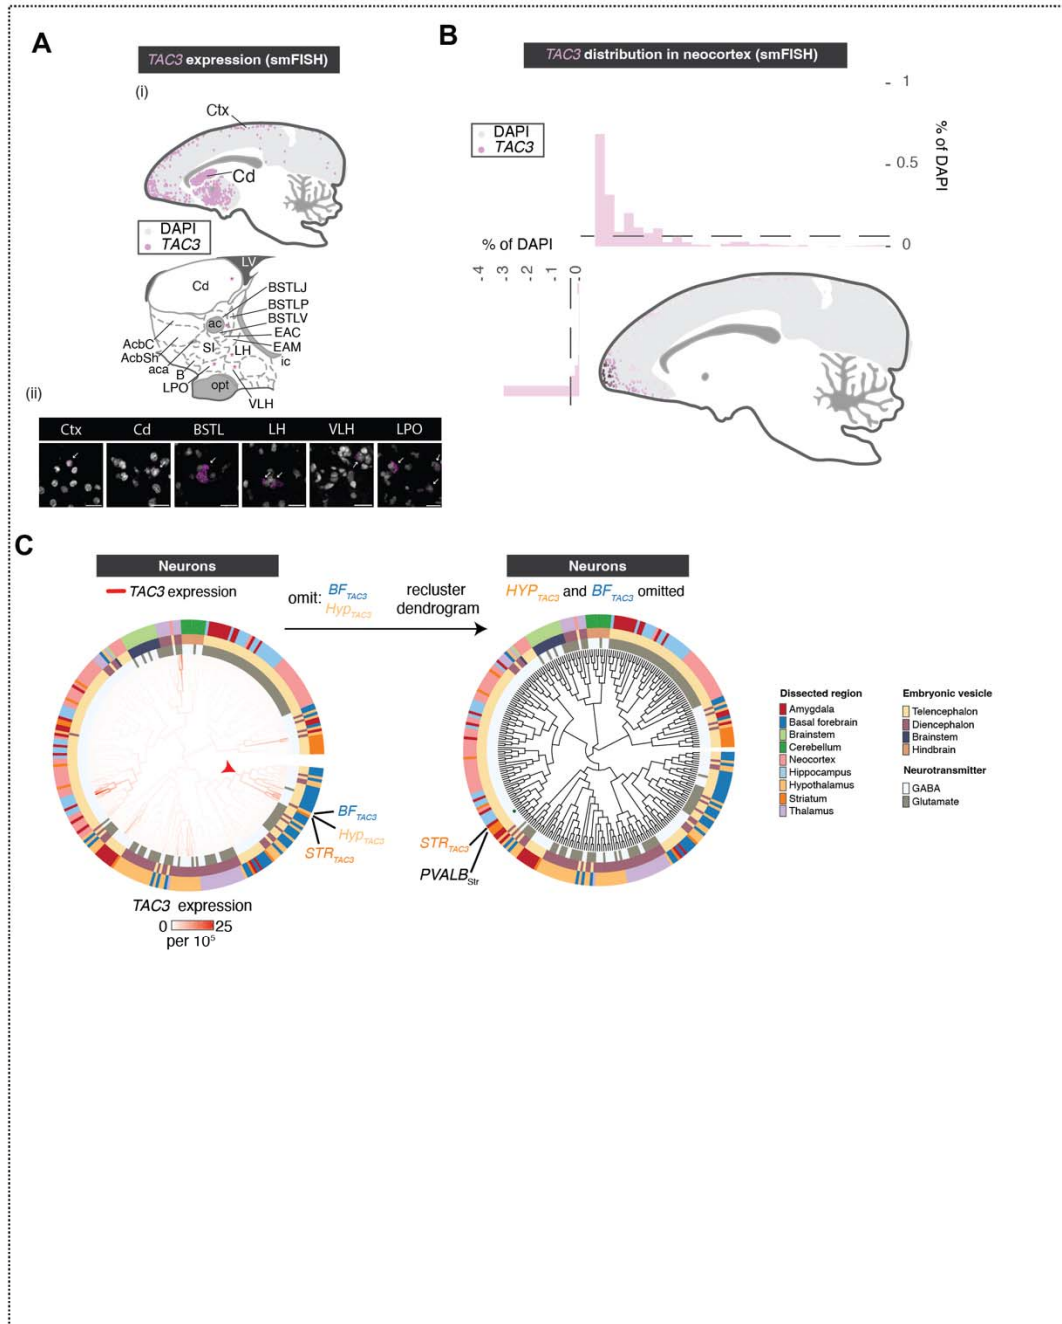

1691  
1692  
1693

**Figure S6. Locations of TAC3+ cells in marmoset forebrain.** (A) smFISH reveals anatomical locations and expression levels TAC3+ types in different brain regions. (i) Schematic of TAC3+ cells imaged across

1694 cortex, dorsal striatum. Ctx = neocortex, Cd = Caudate. (ii) Cartoon close-up of nuclei in striatum, basal  
1695 forebrain and hypothalamus. Magenta stars = locations of *TAC3*<sup>+</sup> cells in lower image panel. Cd =  
1696 Caudate, AcbC = nucleus accumbens core, AcbSh = nucleus accumbens shell, SI = Substantia  
1697 innominata, B = basal nucleus of Meynert, EAM = extended amygdala, medial, EAC = extended  
1698 amygdala, central, ac = anterior commissure, BSTLP = bed nuc st, lateral posterior, BSTLJ = bed nuc st,  
1699 juxtacap, BSTLV = bed nuc st, lateral ventral, LH = lateral hypothalamus, VLH = ventrolateral  
1700 hypothalamus, LPO = lateral preoptic area. **(B)** Density and location of *TAC3*<sup>+</sup> cells as proportion of all  
1701 DAPI<sup>+</sup> cells. Barplots show percentages in bins (approximately 1,290  $\mu$ m per bin ) taken across the  
1702 anterior-posterior (top) and dorsal-ventral (left side) axes. **(C)** Effect on placement of the *TAC3*<sup>+</sup> striatal  
1703 type on the neuronal dendrogram when omitting the two *TAC3*<sup>+</sup> types in hypothalamus and basal  
1704 forebrain. When these types are omitted and hierarchical clustering is repeated (using HCA<sub>PCA</sub>), the  
1705 *TAC3*<sup>+</sup> striatal type is most similar to *PVALB*<sup>+</sup> striatal interneurons, consistent with previous reports that  
1706 only compared telencephalic interneurons (3).  
1707

FIGURE S7

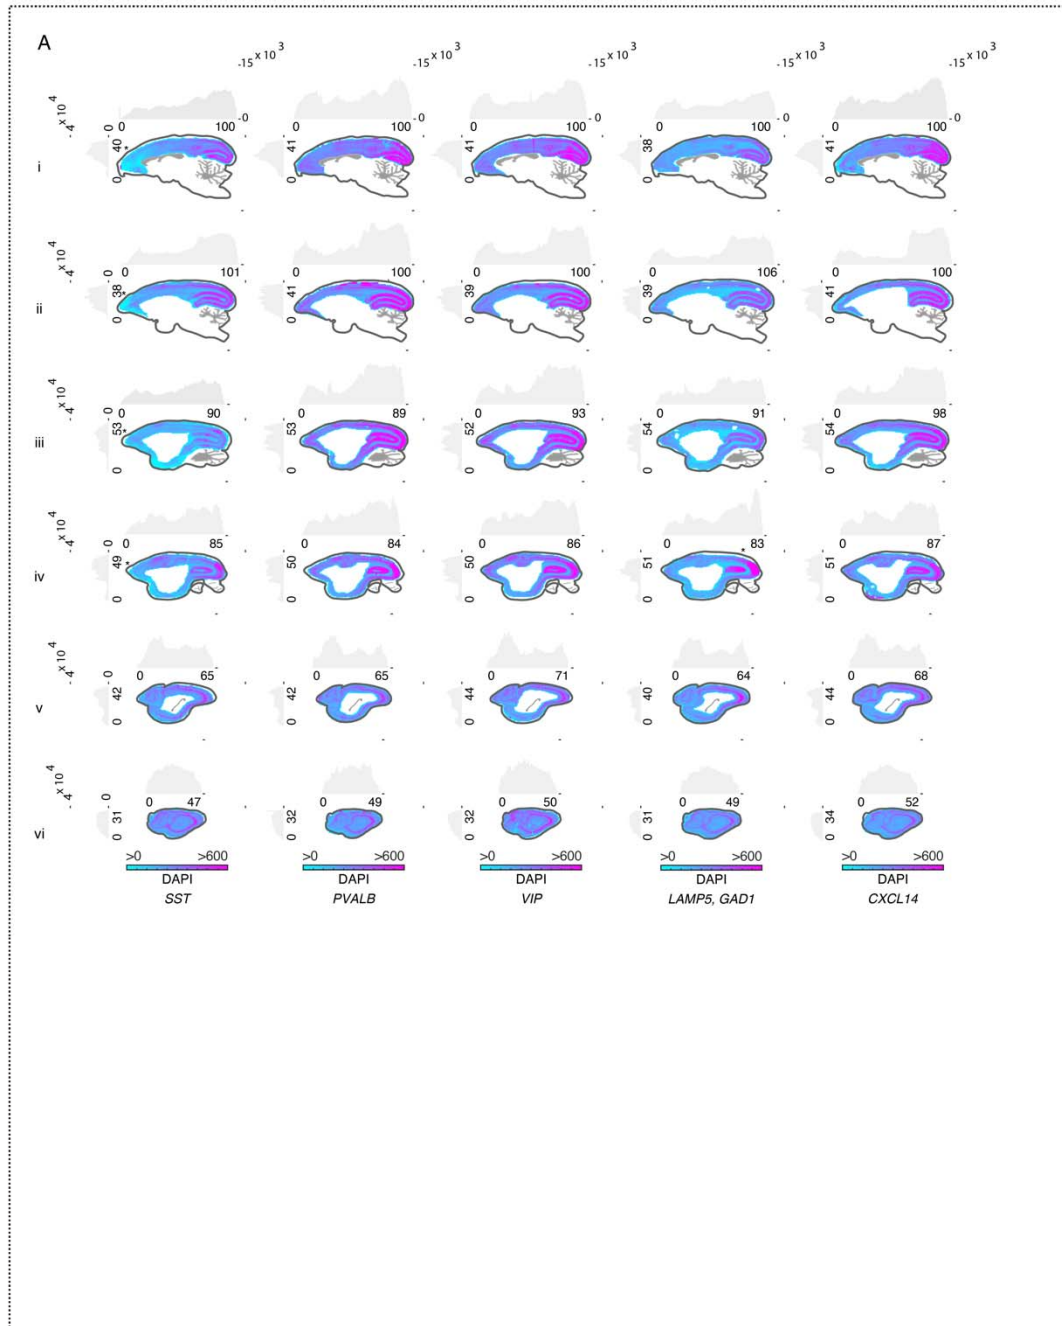

1708  
1709  
1710

**Figure S7. Total cell numbers across marmoset neocortex. (A)** Total numbers of DAPI+ cells per unit area (approximately 387  $\mu\text{m}$  per bin) for each of the sections shown in **Fig. 4C**.

FIGURE S8

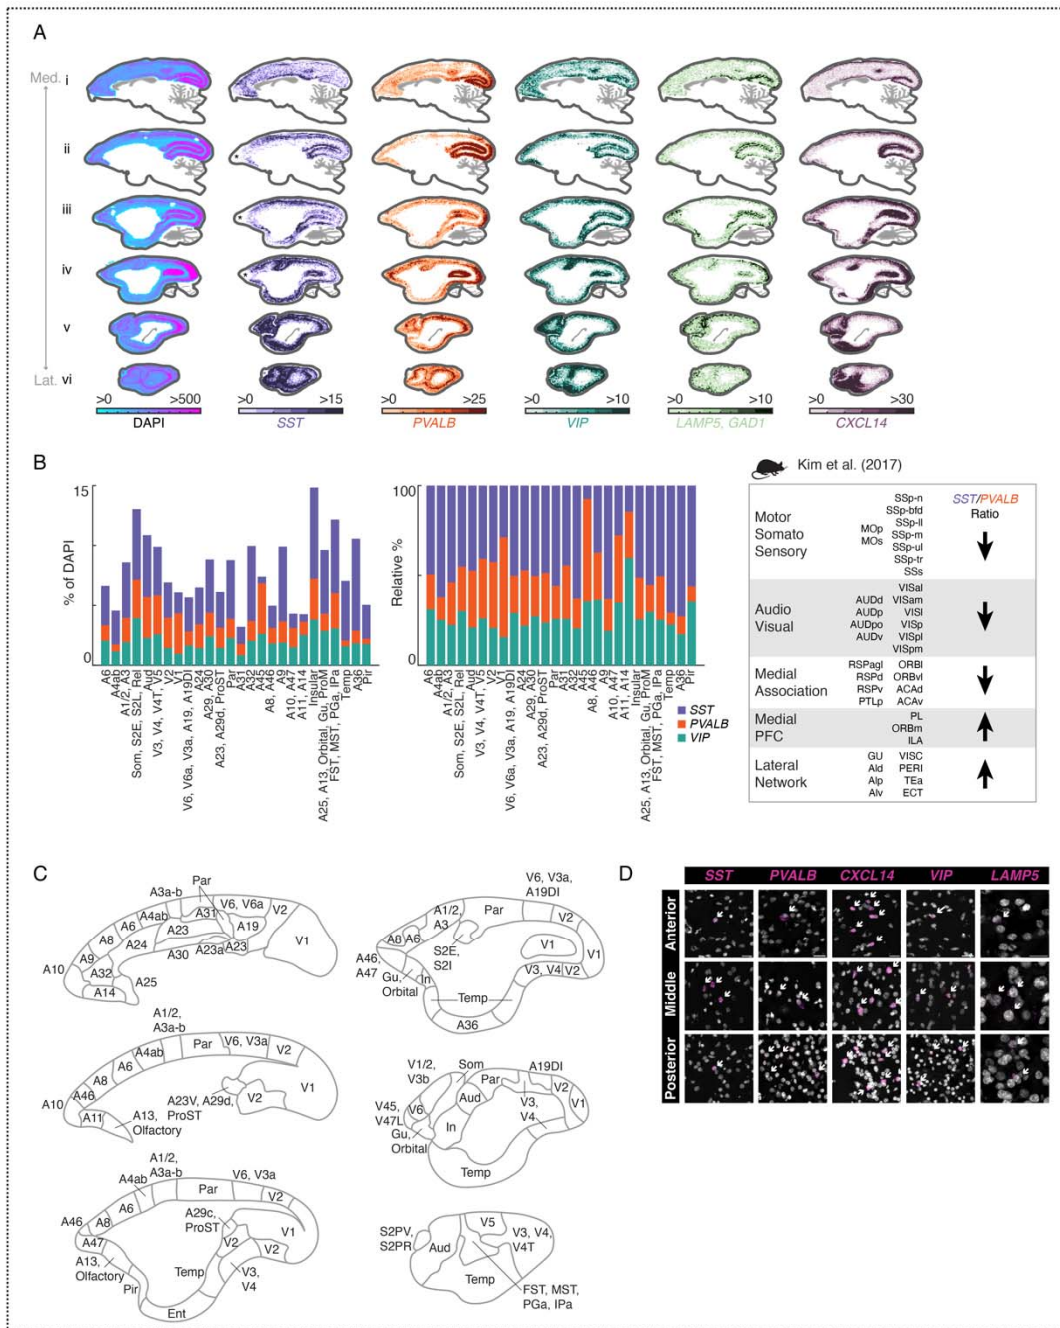

1713 **Figure S8. Interneuron numbers across marmoset neocortex.** (A) smFISH for neocortical interneuron  
1714 subclass markers showing locations of cells positive for each marker across 6 sagittal sections of the  
1715 marmoset neocortex. Heatmap scale shows absolute density per unit area (approximately 387  $\mu\text{m}$  per  
1716 bin). First column shows DAPI and area profiled. (B) (*Left, middle*) Quantitation of interneuron  
1717 proportions by cortical area in marmoset parcellated according to Fig. S8C. (*Right*) Quantitation of  
1718 interneuron proportions by cortical area in mouse reproduced from Kim et al. (2017). (*Left*) Absolute  
1719 percentages of *SST*, *PVALB*, and *VIP* populations. (*Middle*) Same as (*left*), but scaled as proportions to  
1720 100%. (*Right*) Schematic describing ratios of major interneuron types (*Sst+*, *Pvalb+*) in mouse from Kim  
1721 et al. (2017). (C) Cartoons of cortical areas and areal groupings used to bin smFISH neocortical  
1722 interneuron proportions in (B) and **Fig. 4D-E**. Neocortical parcellation from  
1723 <https://doi.org/10.24475/bma.4520>. (D) Examples of smFISH images quantitated in **Fig. 4B-E**. Panels for  
1724 each marker show example positive cells in anterior, middle, and posterior locations across neocortex.  
1725 White arrows indicate positive cells. Scale bar = 20  $\mu\text{m}$ .



FIGURE S9

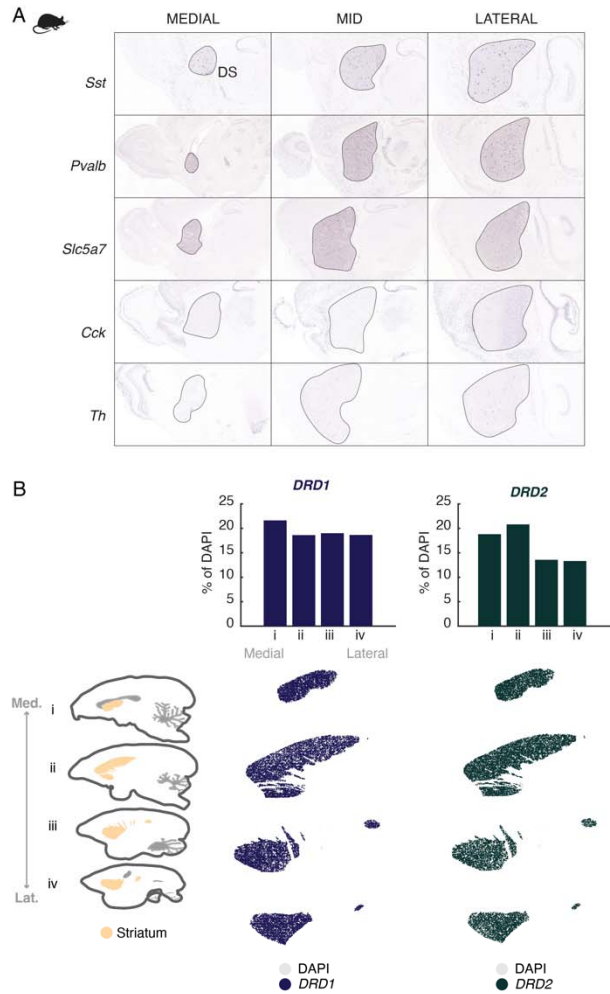

1726

1727

1728

**Figure S9. Interneuron numbers across marmoset striatum. (A)** Mouse striatal *in situ* from Allen Brain Atlas for *Sst*, *Pvalb*, *Slc5a7*, *Cck*, *Th*. **(B)** Cartoon of marmoset striatum illustrates area profiled,

1729 medial to lateral. Proportions of *DRD1+* (dark blue) and *DRD2+* (dark green) cells across primate  
1730 striatum calculated as in **Fig. 4H**.

FIGURE S10

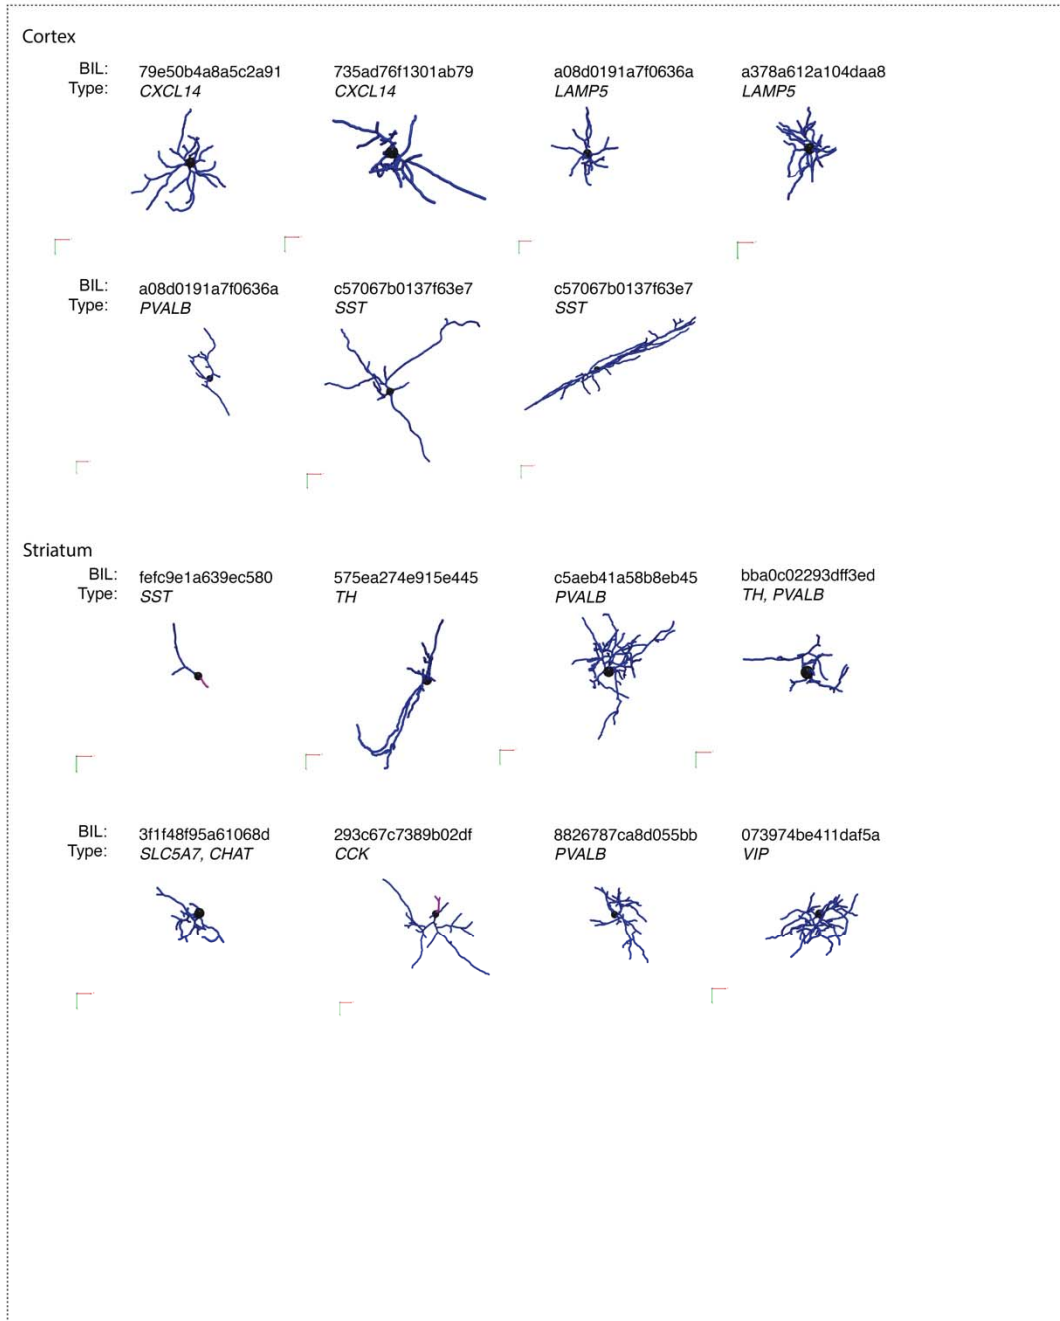

1732 **Figure S10. Morphology examples using NeuTube reconstructions. (A)** Example morphological  
1733 reconstructions of striatal and neocortical interneurons using the NeuTube pipeline. Each cell, along with  
1734 associated smFISH staining, is available for download at <https://doi.org/10.35077/g.609>.

Figure S11

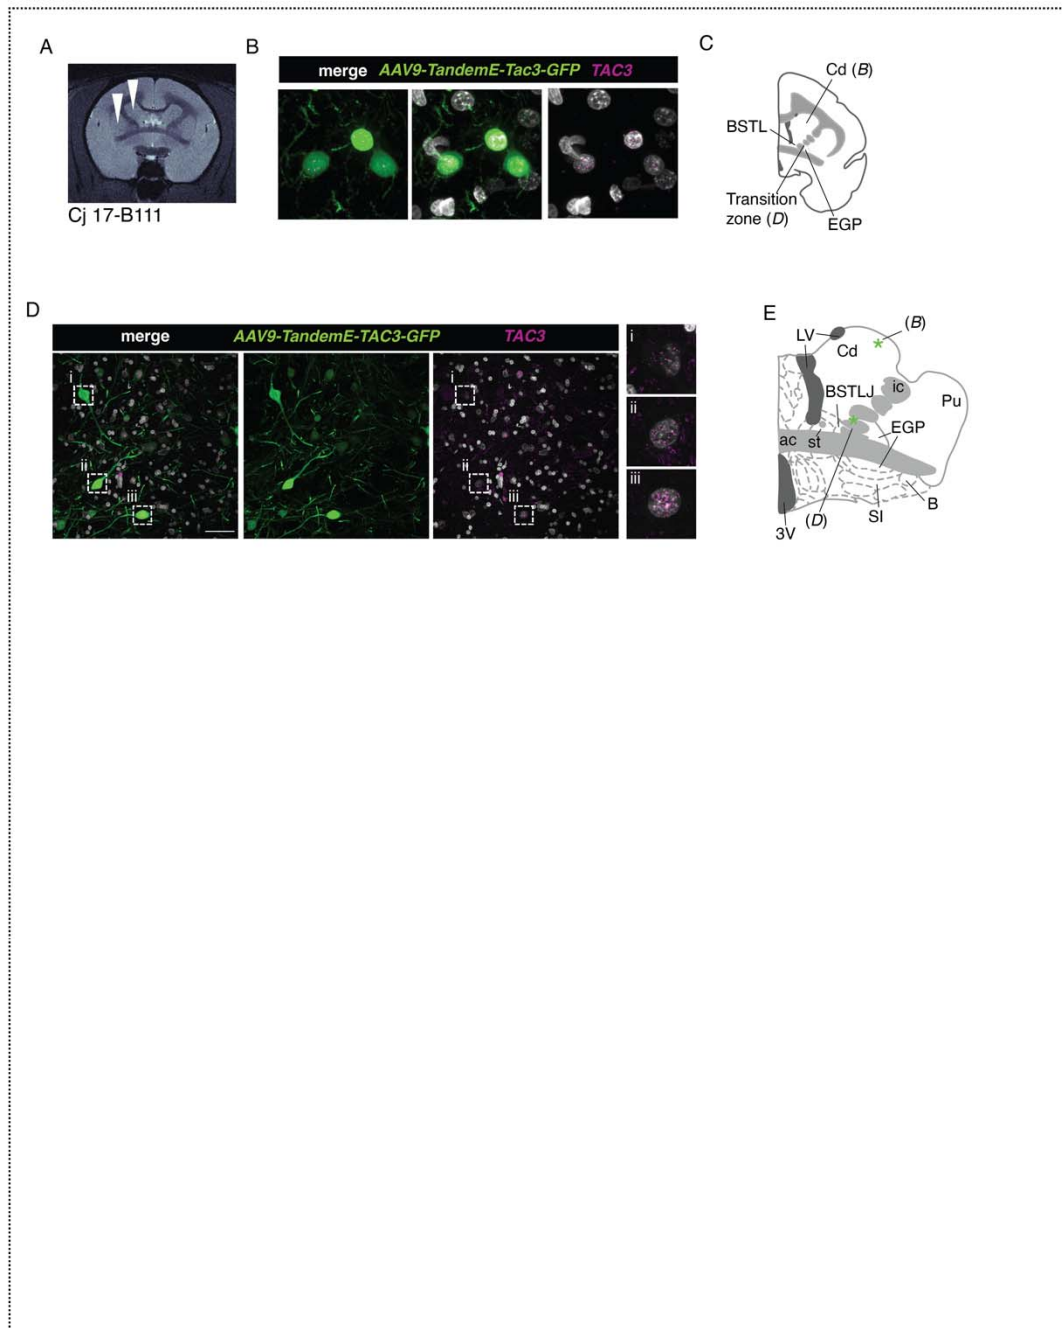

1735  
1736  
1737

**Figure S11. Examples of striatal and peri-striatal *TAC3*<sup>+</sup> neurons labeled by AAV-tandemE-TAC3-EGFP. (A)** MRI showing injection location (white arrowheads) of virus into bilateral dorsal striatum

1738 (caudate) in one animal (Cj 17-B111). **(B)** EGFP antibody-amplified confocal image of a labeled cell  
1739 (position shown in (C) with smFISH for *TAC3* showing colocalization). **(C)** Cartoon showing location of  
1740 positive cells in (B) as well as labeled cells in transition zone (D). **(D)** Examples of extra-striatal labeled  
1741 cells from injections in (A). **(E)** Position of cells in (D). Cd = Caudate, SI = Substantia innominata, B =  
1742 basal nucleus of Meynert, ac = anterior commissure, BSTLP = bed nuc st, lateral posterior, BSTLJ = bed  
1743 nuc st, juxtacap, 3V = third ventricle, LV = lateral ventricle.

1744

1745 **Table S1. Marmoset sample information.** Table of animals, metadata, and experimental information.

1746

1747 **Table S2. snRNA-seq dataset by donor and brain area.** Tables of the number of cells per brain  
1748 structure and samples per donor.

1749

1750 **Table S3. Neocortical rDEGs across three donors.** Neocortical rDEGs across three donors with  
1751 pairwise comparisons between neocortical locations for major clusters of cortical excitatory neurons,  
1752 inhibitory neurons, astrocytes and oligodendrocyte lineage types.

1753

1754 **Table S4. Fluorescent *in situ* hybridization probes and antibodies used.** A list of all FISH probes  
1755 (RNA-Scope and Molecular Instruments) and antibodies used for validation of gene and protein  
1756 expression *in situ*.

1757

1758 **Table S5. Morphological reconstructions performed with Neutube.** A list of all cells reconstructed  
1759 with Neutube with their corresponding morphological measurements.

1760

1761 **Table S6. Morphological reconstructions performed with Imaris.** A list of all cells reconstructed with  
1762 Imaris with their corresponding morphological measurements.

1763

1764 **Table S7. Links and DOIs.** A list of all links and DOIs referenced.

1765

1766 **Data S1. Striatal and cortical medio-lateral quantification.** Tabular data for striatal and cortical  
1767 medio-lateral histograms/bar plots.

1768

1769 **Data S2. *TAC3* medio-lateral quantification.** Tabular data for *TAC3* medio-lateral histograms and bar  
1770 plots.
